# Supplementary material for: Development and validation of a machine learning-supported strategy of patient selection for osteoarthritis clinical trials: the IMI-APPROACH study
Source: PubMed Central journal article supplement — Osteoarthr Cartil Open. 2023 Aug 18;5(4):100406. doi: 10.1016/j.ocarto.2023.100406 (PMC10463256; doi:10.1016/j.ocarto.2023.100406), 2023-08-18
Supplement: mmc1.pdf [file mmc1.pdf]

# SUPPLEMENTARY MATERIAL

## 1 eMethods

### 1.1 Cross-cohort harmonisation

Based on the study protocols and data collection manuals, we identified semantic similarities (common data concepts) between CHECK and each of the target cohorts. The number of mapped attributes for each cohort is shown in eTable 1. Then we processed the syntax by either (1) transforming the attribute values in CHECK to a common lowest denominator set, or (2) transforming the other cohort attribute values to match the CHECK syntax (through mapping, re-categorization, aggregation, and scale alignment), always choosing the approach preserving more information. Finally, we performed a quality control exercise to detect mistakes (mainly cross tabulation and range/distribution comparison).

|         | patients | attributes | mapped |
|---------|----------|------------|--------|
| MUST    | 630      | 886        | 77–84  |
| HOSTAS  | 538      | 130        | 45–50  |
| DIGICOD | 377      | 425        | 52–61  |
| PROCOAC | 983      | 288        | 40–57  |

**eTable 1:** Number of attributes mapped between each cohort and CHECK. A range is reported, as the exact number depends on the most recent visit timing and a number of attributes that were dropped due to the missing values (50% threshold was used).

### 1.2 Patient categories

To categorize patients we used one non-progressive category (**N**) and three progressive categories related to pain (**P**), structure (**S**), and combined pain and structure (**P+S**). The progression was analyzed multiple times per patient, in series of time windows, where a period between two visits was  $\geq 2$  years (see eFigure 1 for an example), which is representative of typical minimum timeline of a clinical trial. As a consequence, a patient may have progressive and non-progressive periods along the disease trajectory through time.

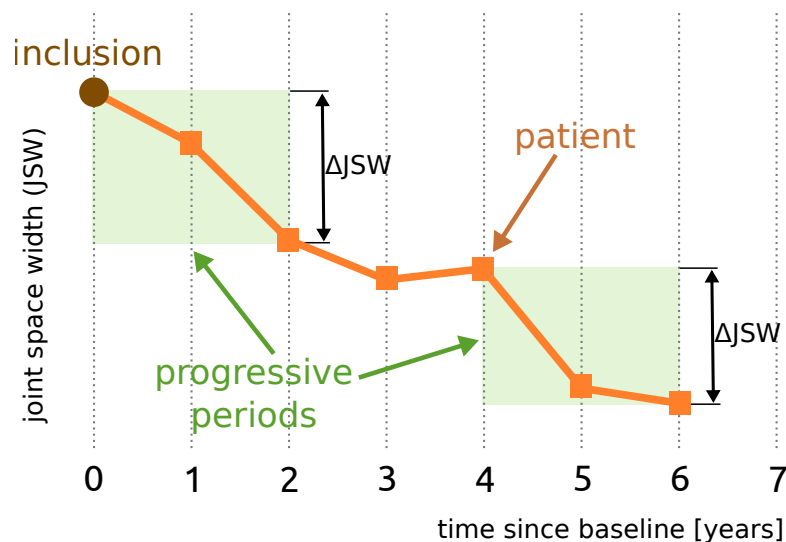

**eFigure 1:** Illustration of how the periods were used in the analysis. Example patient was included at year 0 of the cohort timeline and had measurements of joint space width (JSW) taken at every year until a knee replacement after year 6. Two periods marked with green boxes: (0, 2) and (4, 6), were assigned to the structural progression category, as the average change in JSW during these periods was above the pre-defined threshold.

When the progression could not be assessed due to missing values, the corresponding period was excluded from the dataset. When measurements were present for two knees, the most affected knee (with greater  $\Delta$ JSW) was used to decide the progression status. Additionally, all periods following a knee replacement were removed.

### 1.3 Machine learning

#### 1.3.1 Data preprocessing

Before the start of the harmonisation process we cleaned the original datasets as much as possible. We dropped duplicated columns, calculated missing visit dates or patient age using other data (e.g. visit date and age at

baseline / birthday), split the values of multi-choice attributes into separate columns, removed comments, and converted text values to numerical categories.

All attributes with more than 50% missing values and all periods with over 40% missing attributes were removed from each dataset. In addition, we removed attributes that did not vary at the start of each period (as they cannot be used to distinguishing between the categories), and attributes that could be exploited by the model, such as dates, visit numbers, and IDs. In attempt to fix some of the missing values, we filled forward attributes that do not change across visits (e.g. past diseases).

We assumed that all attributes with at most 10 different values are categorical, and we manually identified ordinal (e.g. *low, medium, high*) and continuous (e.g. *1.2, 2.4, 3.7*) attributes in the CHECK cohort variable guide.

Additional preprocessing was performed during the model training. The missing values were imputed, based on the training set only (to avoid information leaks from the test set). The imputation was carried out with the mode/mean value (for categorical/continuous attributes).

The final step after imputation was the one-hot encoding of nominal attributes (e.g. *left, right*). This encoding creates additional dummy attributes, one per category, and sets the one corresponding to the attribute value (the “hot one”) to 1, and others to 0. All categorical attributes with more than 2 distinct values were encoded, unless they were known to be ordinal.

### 1.3.2 The duo classifier

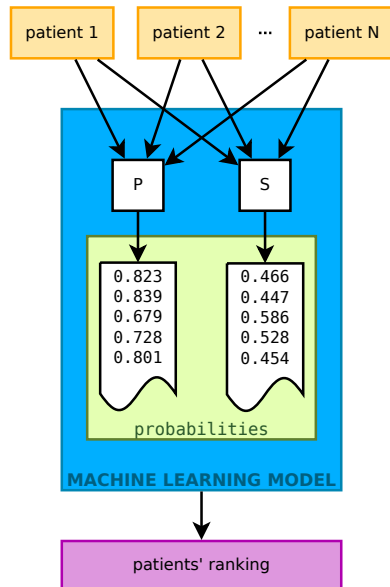

**eFigure 2:** The *duo classifier* (Widera et al. 2020) uses a random forest algorithm to train two sub-models to independently predict probabilities of the pain (P) and structure (S) related progression. We implemented this classifier as a wrapper class on top of the sub-models that predicts one of the four class labels (N, P, S, P+S), but still provides independent P and S probabilities. These probabilities are later combined into a score that is used to rank the patients. Note that the probabilities do not represent the real-world likelihood of progression, but rather express the confidence of the model in its predictions. In other words, they need to be considered in context of the specific dataset being used to train the models.

### 1.3.3 Cross-validation

In all experiments, out-of-sample estimation of the algorithm performance was used. That is, some of the samples were kept hidden from the algorithm during training, and used later to test it. Specifically, we followed the standard 10-fold stratified cross-validation (CV) protocol, in which the instances are split into 10 approximately equal-sized parts (folds) and the split preserves the overall class distribution within each fold. Each fold is then used in turn as a test set, and the remaining 9 folds are used as a training set. To score the method performance, rather than averaging the scores across all 10 folds, we pooled the out-of-sample predictions together and calculated a single score.

The cross-validation was repeated 10 times with different partitions into folds. As random forest algorithm is not deterministic, we also repeated the model training (25 times) with different random seeds (the seeds remained constant across folds and cross-validation repeats).

To tune the configuration of the *duo classifier*, we performed an exhaustive search through 84 combinations of three random forest parameters: **number of trees**  $\in [100, 200, 400, 600, 800, 1000]$ , **maximum tree depth**  $\in [4, 5, \dots, 10]$ , and **split quality criterion**  $\in [gini, entropy]$  (standing for Gini impurity and information gain). On screening data, we limited the search to 60 combinations by using only Gini impurity as the split criterion, **number of trees**  $\in [100, 200, 400, 600, 800, 1000]$ , and **maximum tree depth**  $\in [3, 4, \dots, 12]$ .

Because multiple algorithm parameters were tested, cross-validated performance of the best configuration is an optimistically biased estimate of the performance of the final model trained on all data. This “multiple induction” problem is conceptually equivalent to multiple hypothesis testing in statistics. To mitigate this, the focus was placed on the performance of the median model (rather than the best one) for each cross-validation repeat, and the median performance across all repeats.

### 1.3.4 $F_1$ score and class imbalance

The initial performance of the models was measured using the  $F_1$  score (harmonic mean of positive predictive value (precision) and sensitivity (recall)). Since we needed to deal with four imbalanced categories, we used a macro-weighted multi-class variant of the  $F_1$  score, in which per class  $F_1$  scores are averaged and weighted by support (number of periods in each category).

### 1.3.5 Recruitment score

Despite its advantages, the  $F_1$  score treats all mistakes as equal and does not represent the clinical preference for selection of patients in the **P+S** category. Therefore, we designed a specialised **recruitment score** directly based on the results of simulated selections. All simulations were based on the ranking derived from the model predictions through the use of a ranking function (see eSection 1.3.6). We tested 6 different selection sizes  $k$  representing an increasing number of patients, roughly corresponding to the number of patients expected to be enrolled from our cohorts. For each top  $k$  patients we calculated a sub-score (eEquation 1) as a weighted sum of the relative selection ( $r_i$ ) in each category, normalised by the maximum weight. The weights  $c_i$  were used to model the clinical preference between the categories **N** < **P** < **S** < **P+S**. We used two kinds of  $c_i$  weights (see eTable 2): split weights (where non-progressive category has a negative weight) and progressive weights (where **S** and **P+S** categories are weighted much heavier). The total recruitment score was calculated as a weighted average of sub-scores for all selection sizes (eEquation 2). The weights  $s_k$  were centered around the  $k \in [60, 90]$  range (see eTable 2).

| category   | weights ( $c_i$ ) |             | size ( $k$ ) | weight ( $s_k$ ) |
|------------|-------------------|-------------|--------------|------------------|
|            | split             | progressive |              |                  |
| <b>N</b>   | -0.5              | 0           | <b>10</b>    | 0.50             |
| <b>P</b>   | 1.0               | 1           | <b>30</b>    | 0.75             |
| <b>S</b>   | 1.5               | 5           | <b>60</b>    | 1.00             |
| <b>P+S</b> | 2.0               | 7           | <b>90</b>    | 1.00             |
|            |                   |             | <b>120</b>   | 0.75             |
|            |                   |             | <b>150</b>   | 0.50             |

$$sub\_score = \frac{1}{\max_i(c_i)} \sum_i c_i * r_i \quad (1)$$

$$total\_score = \frac{\sum_k s_k * sub\_score(k)}{\sum_k s_k} \quad (2)$$

eTable 2: Weights used by the recruitment score.

### 1.3.6 Time factor in training of the selection models

The patient categories were defined for three periods between the CHECK visits at which the radiographic readings were taken: (0, 2), (2, 5), and (5, 8). The difference in length (2 vs. 3 years) is negligible, as the categories have been defined using the average change per year, rather than a difference over the entire period. Additional complication arose from the fact, that for the majority of patients, even the most recent visits happened several years prior (see eTable 3). It required adjustment in training, to make sure that the patient category is not defined for a period immediately after the visit, but for a period shifted forward in time that matches the running time of the study. For example, when the most recent visit was two years prior, we used visit 0 data to predict the category of the (2, 5) period (that is shifted 2 years into the future). Given the available periods, three different shifts were possible: 5 years ( $0 \Rightarrow (5, 8)$ ), 3 years ( $2 \Rightarrow (5, 8)$ ), and 2 years ( $0 \Rightarrow (2, 5)$ ). For a few patients, no shift was needed as the data were recent enough, to directly use the original period categories in training.

| year           | '09 | '10 | '11 | '12 | '13 | '14 | '15 | '16 | '17 |
|----------------|-----|-----|-----|-----|-----|-----|-----|-----|-----|
| <b>MUST</b>    | —   | 91  | 260 | 254 | 25  | —   | —   | —   | —   |
| <b>HOSTAS</b>  | 7   | 5   | 37  | 21  | 85  | 79  | 132 | 135 | 37  |
| <b>DIGICOD</b> | —   | —   | —   | —   | 4   | 79  | 144 | 126 | 24  |
| <b>PROCOAC</b> | 36  | 44  | 47  | 41  | 53  | 132 | 298 | 220 | —   |
| <b>shift</b>   | —   | —   | 5y  | 5y  | 3y  | 3y  | 2y  | 2y  | 0y  |

eTable 3: The number of patients with the most recent visit in particular year and a corresponding shift of the target period used in training. Notice that the shift is not always exact, but only approximated due to the boundaries (begin/end years) of categorised CHECK periods.

### 1.3.7 Ranking function

To be able to rank the patients from each cohort, the  $\mathbf{P}$  and  $\mathbf{S}$  probabilities returned by the model were combined (see eFigure 3) into a single score using a ranking function.

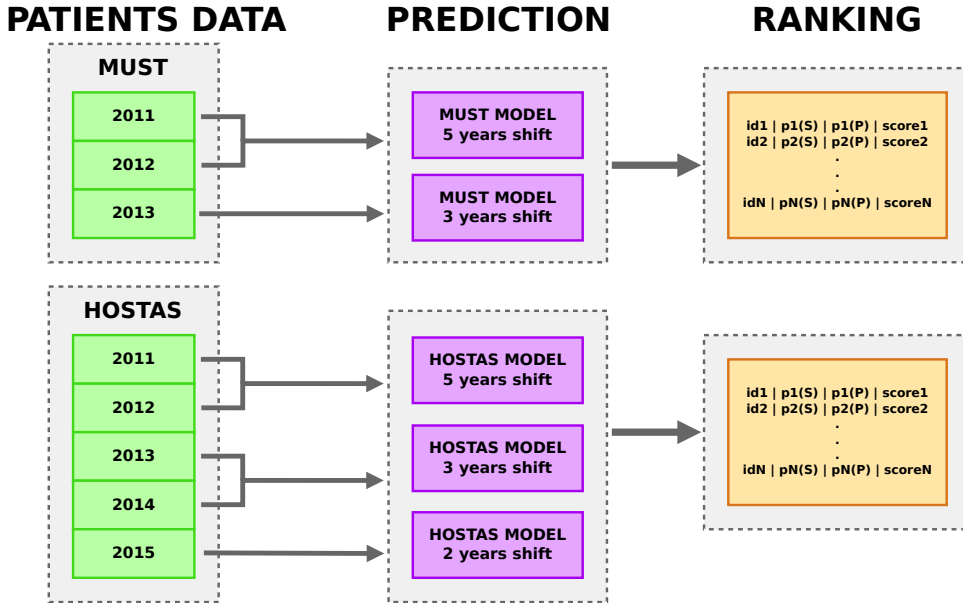

**eFigure 3:** Illustration of the link between the cohort data and multi-model predictions used to construct the per cohort selection rankings. Only MUST and HOSTAS are shown, but similar procedure was followed for DIGICOD and PROCOAC.

The ranking function was designed to bias the selection towards the minority category (the  $\mathbf{P}+\mathbf{S}$  patients). In our experiments, we used three different ranking functions: direct sum (eEquation 3), scaled sum (eEquation 4), and sum of z-scores (eEquation 5). The idea behind the latter two, was to correct for differences in range between the two probability distributions ( $\mathbf{P}$  range was found to be broader than  $\mathbf{S}$ ) and make them contribute equally to the ranking score.

$$score = P + S \quad (3) \quad score = \frac{P}{\max(P)} + \frac{S}{\max(S)} \quad (4) \quad score = \frac{P - \mu_p}{\sigma_p} + \frac{S - \mu_s}{\sigma_s} \quad (5)$$

Because different ranking functions could be used for each time shift, the scores were rescaled to the same range (using min-max normalisation) before being merged into a single cohort selection ranking.

As expected, the model prediction quality decreased with the increasing time shift. To represent the lower trust in the ranking score when a large shift is applied, we added a progressive shift-dependent non-linear penalty (eEquation 6) to the ranking score. In effect, patients with the oldest data were less likely to have a high rank.

$$penalty\_multiplier(x) = 1 - (9x + x^2)/200 \quad (6)$$

## 1.4 Enrolment process

The enrolment decisions were made weekly (or more often when needed) closely following the availability of the radiograph assessment data. We made additional effort to synchronize the start of the screening process at all recruitment centers, to maximize the number of patients in the ranking at the moment of first decisions. This was important, as the confidence in an enrolment decision increases with more patients in the ranking. That is, when many patients are already ranked, we can trust that a highly ranked new patient is likely to remain in the top of the ranking throughout the entire recruitment process, so a decision to enroll this person is straightforward. When the rank is close to the borderline between already enrolled and rejected patients, or the total number of ranked patients is low, it is best to delay the decision and wait for more data to increase the confidence. However, some sub-optimal decisions are unavoidable, as they are always made on partial ranking: never knowing how the next group of patients will be ranked. As a result, in retrospect some patients could have been rejected too soon if many future patients were ranked lower, or enrolled too early if many future patients were ranked higher.

## 2 eResults

### 2.1 Enrolment

| recruitment center | all  | invited | ranked | enrolled | rej. ratio |
|--------------------|------|---------|--------|----------|------------|
| Oslo (MUST)        | 630  | 53      | 40     | 31       | 22.5%      |
| Leiden (HOSTAS)    | 538  | 71      | 68     | 50       | 26.5%      |
| Paris (DIGICOD)    | 377  | 29      | 29     | 20       | 31.0%      |
| A Coruña (PROCOAC) | 983  | 58      | 56     | 43       | 23.2%      |
| Utrecht (CHECK)    | 1002 | 222     | 213    | 153      | 28.2%      |
| TOTAL              | 3530 | 433     | 406    | 297      | 26.8%      |

**eTable 4:** Recruitment process in numbers. The rejection ratio is the percentage of ranked patients not enrolled in the study.

## 2.2 Best model configurations with respect to recruitment score

| $F_1$ score   | configuration | AUC(P)         | configuration | AUC(S)         | configuration  |
|---------------|---------------|----------------|---------------|----------------|----------------|
| <b>0.5715</b> | 800-gini-2-d8 | <b>0.76176</b> | 400-gini-2-d7 | <b>0.67508</b> | 100-gini-2-d12 |
| <b>0.5715</b> | 400-gini-2-d8 | <b>0.75076</b> | 600-gini-2-d7 | <b>0.67263</b> | 600-gini-2-d10 |
| <b>0.571</b>  | 600-gini-2-d8 | <b>0.74835</b> | 800-gini-2-d7 | <b>0.67082</b> | 400-gini-2-d9  |
| ...           |               | ...            |               | ...            |                |
| <b>0.517</b>  | 600-gini-2-d3 | <b>0.67781</b> | 200-gini-2-d3 | <b>0.54854</b> | 400-gini-2-d3  |
| <b>0.5165</b> | 200-gini-2-d3 | <b>0.67145</b> | 200-gini-2-d4 | <b>0.54734</b> | 800-gini-2-d3  |
| <b>0.5155</b> | 100-gini-2-d3 | <b>0.66696</b> | 200-gini-2-d5 | <b>0.51323</b> | 200-gini-2-d3  |

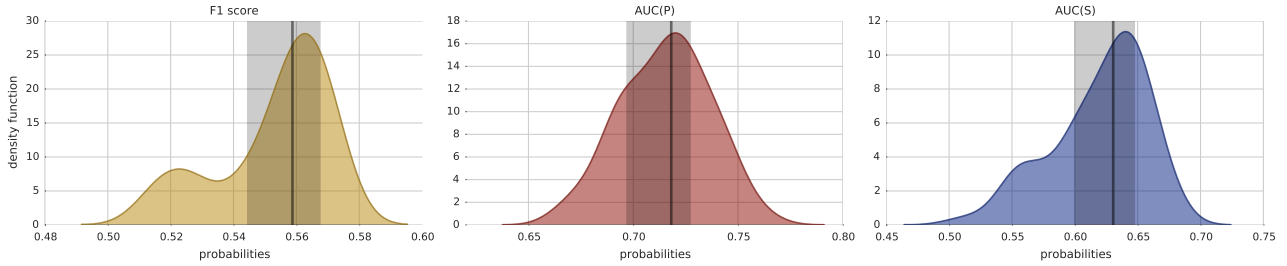

**Figure 4:** Distribution of quality measures across all **screening model** configurations. The grey area shows interquartile range and thick vertical line indicates the median value. Tables show 3 top/bottom scores and corresponding model parameters.

ranking function: **sum** 0.55880  $+0.00802$

| size | N [1153] |     | P [298] |     | S [330] |     | P+S [111] |     |
|------|----------|-----|---------|-----|---------|-----|-----------|-----|
|      | abs      | rel | abs     | rel | abs     | rel | abs       | rel |
| 10   | 0        | 0%  | 3       | 30% | 0       | 0%  | 7         | 70% |
| 30   | 3 $+1$   | 10% | 9 $-2$  | 30% | 5 $+2$  | 17% | 13 $-1$   | 43% |
| 60   | 13 $-1$  | 22% | 21 $+1$ | 35% | 7       | 12% | 19        | 32% |
| 90   | 19 $-4$  | 21% | 34 $+2$ | 38% | 12      | 13% | 25 $+2$   | 28% |
| 120  | 32       | 27% | 44 $-2$ | 37% | 15      | 12% | 29 $+2$   | 24% |
| 150  | 46 $+2$  | 31% | 56      | 37% | 19      | 13% | 29 $-2$   | 19% |

configuration: 1000-gini-2-d6  $F_1$  score: 0.55950 (29)  
AUC(P): 0.72204 (26)  
AUC(S): 0.62969 (31)

ranking function: **sum** 0.47798  $+0.00787$

| size | N [1153] |     | P [298] |     | S [330] |     | P+S [111] |     |
|------|----------|-----|---------|-----|---------|-----|-----------|-----|
|      | abs      | rel | abs     | rel | abs     | rel | abs       | rel |
| 10   | 0        | 0%  | 3       | 30% | 0       | 0%  | 7         | 70% |
| 30   | 3 $+1$   | 10% | 9 $-2$  | 30% | 5 $+2$  | 17% | 13 $-1$   | 43% |
| 60   | 13 $-1$  | 22% | 21 $+1$ | 35% | 7       | 12% | 19        | 32% |
| 90   | 19 $-4$  | 21% | 34 $+2$ | 38% | 12      | 13% | 25 $+2$   | 28% |
| 120  | 32       | 27% | 44 $-2$ | 37% | 15      | 12% | 29 $+2$   | 24% |
| 150  | 46 $+2$  | 31% | 56      | 37% | 19      | 13% | 29 $-2$   | 19% |

configuration: 1000-gini-2-d6  $F_1$  score: 0.55950 (29)  
AUC(P): 0.72204 (26)  
AUC(S): 0.62969 (31)

ranking function: **scaled** 0.56035  $+0.01234$

| size | N [1153] |     | P [298] |     | S [330] |     | P+S [111] |     |
|------|----------|-----|---------|-----|---------|-----|-----------|-----|
|      | abs      | rel | abs     | rel | abs     | rel | abs       | rel |
| 10   | 0        | 0%  | 3       | 30% | 0       | 0%  | 7         | 70% |
| 30   | 3 $+1$   | 10% | 9 $-2$  | 30% | 5 $+1$  | 17% | 13        | 43% |
| 60   | 13 $-1$  | 22% | 21      | 35% | 8 $+1$  | 13% | 18        | 30% |
| 90   | 19 $-4$  | 21% | 34 $+1$ | 38% | 12      | 13% | 25 $+3$   | 28% |
| 120  | 30       | 25% | 46 $-2$ | 38% | 16 $+1$ | 13% | 28 $+1$   | 23% |
| 150  | 46 $+1$  | 31% | 53 $-1$ | 35% | 21 $+1$ | 14% | 30 $-1$   | 20% |

configuration: 1000-gini-2-d6  $F_1$  score: 0.55950 (29)  
AUC(P): 0.72204 (26)  
AUC(S): 0.62969 (31)

ranking function: **scaled** 0.48095  $+0.01700$

| size | N [1153] |     | P [298] |     | S [330] |     | P+S [111] |     |
|------|----------|-----|---------|-----|---------|-----|-----------|-----|
|      | abs      | rel | abs     | rel | abs     | rel | abs       | rel |
| 10   | 1 $+1$   | 10% | 2 $-1$  | 20% | 1 $+1$  | 10% | 6 $-1$    | 60% |
| 30   | 3 $+1$   | 10% | 9 $-2$  | 30% | 4       | 13% | 14 $+1$   | 47% |
| 60   | 11 $-3$  | 18% | 19 $-2$ | 32% | 11 $+4$ | 18% | 19 $+1$   | 32% |
| 90   | 22 $-1$  | 24% | 33      | 37% | 13 $+1$ | 14% | 22        | 24% |
| 120  | 32 $+2$  | 27% | 42 $-6$ | 35% | 20 $+5$ | 17% | 26 $-1$   | 22% |
| 150  | 45       | 30% | 53 $-1$ | 35% | 21 $+1$ | 14% | 31        | 21% |

configuration: 100-gini-2-d6  $F_1$  score: 0.55700 (36)  
AUC(P): 0.69516 (47)  
AUC(S): 0.64988 (13)

ranking function: **zscore** 0.53659  $+0.00982$

| size | N [1153] |     | P [298] |     | S [330] |     | P+S [111] |     |
|------|----------|-----|---------|-----|---------|-----|-----------|-----|
|      | abs      | rel | abs     | rel | abs     | rel | abs       | rel |
| 10   | 0 $-1$   | 0%  | 3       | 30% | 1 $+1$  | 10% | 6         | 60% |
| 30   | 6 $+2$   | 20% | 8       | 27% | 4 $-1$  | 13% | 12 $-1$   | 40% |
| 60   | 15 $+1$  | 25% | 18 $-1$ | 30% | 9 $-1$  | 15% | 18 $+1$   | 30% |
| 90   | 23 $-2$  | 26% | 26 $-4$ | 29% | 15 $+1$ | 17% | 26 $+5$   | 29% |
| 120  | 34 $+2$  | 28% | 33 $-6$ | 28% | 22 $+1$ | 18% | 31 $+3$   | 26% |
| 150  | 43       | 29% | 45 $-6$ | 30% | 27      | 18% | 35 $+6$   | 23% |

configuration: 200-gini-2-d5  $F_1$  score: 0.54350 (47)  
AUC(P): 0.66696 (60)  
AUC(S): 0.61694 (36)

ranking function: **zscore** 0.48448  $+0.01942$

| size | N [1153] |     | P [298] |     | S [330] |     | P+S [111] |     |
|------|----------|-----|---------|-----|---------|-----|-----------|-----|
|      | abs      | rel | abs     | rel | abs     | rel | abs       | rel |
| 10   | 0 $-1$   | 0%  | 3       | 30% | 1 $+1$  | 10% | 6         | 60% |
| 30   | 6 $+2$   | 20% | 8       | 27% | 4 $-1$  | 13% | 12 $-1$   | 40% |
| 60   | 15 $+1$  | 25% | 18 $-1$ | 30% | 9 $-1$  | 15% | 18 $+1$   | 30% |
| 90   | 23 $-2$  | 26% | 26 $-4$ | 29% | 15 $+1$ | 17% | 26 $+5$   | 29% |
| 120  | 34 $+2$  | 28% | 33 $-6$ | 28% | 22 $+1$ | 18% | 31 $+3$   | 26% |
| 150  | 43       | 29% | 45 $-6$ | 30% | 27      | 18% | 35 $+6$   | 23% |

configuration: 200-gini-2-d5  $F_1$  score: 0.54350 (47)  
AUC(P): 0.66696 (60)  
AUC(S): 0.61694 (36)

(a) progressive weights

(b) split weights

**Table 5:** Results of simulated recruitment for the **screening model** configurations with best recruitment score (given at the top of each table). The differences in recruitment compared to the model configuration with highest  $F_1$  score are highlighted with **green** (positive) and **red** (negative) colour. For each of the ranking functions the used model configuration and its prediction quality measured with  $F_1$  score and AUC is given for reference (rank of the measure among all configurations is given in brackets).

| $F_1$ score   | configuration     | AUC(P)         | configuration     | AUC(S)         | configuration    |
|---------------|-------------------|----------------|-------------------|----------------|------------------|
| <b>0.531</b>  | 1000-gini-2-d6    | <b>0.72447</b> | 100-gini-2-d10    | <b>0.62874</b> | 100-gini-2-d7    |
| <b>0.5305</b> | 400-gini-2-d6     | <b>0.72223</b> | 600-gini-2-d7     | <b>0.62108</b> | 100-entropy-2-d9 |
| <b>0.53</b>   | 1000-entropy-2-d6 | <b>0.71798</b> | 400-entropy-2-d10 | <b>0.61126</b> | 200-entropy-2-d8 |
| ...           |                   | ...            |                   | ...            |                  |
| <b>0.487</b>  | 600-gini-2-d10    | <b>0.62554</b> | 200-entropy-2-d7  | <b>0.53129</b> | 600-gini-2-d9    |
| <b>0.486</b>  | 1000-gini-2-d10   | <b>0.62238</b> | 100-gini-2-d8     | <b>0.5312</b>  | 100-entropy-2-d5 |
| <b>0.4855</b> | 800-gini-2-d10    | <b>0.60731</b> | 100-entropy-2-d10 | <b>0.52607</b> | 400-gini-2-d8    |

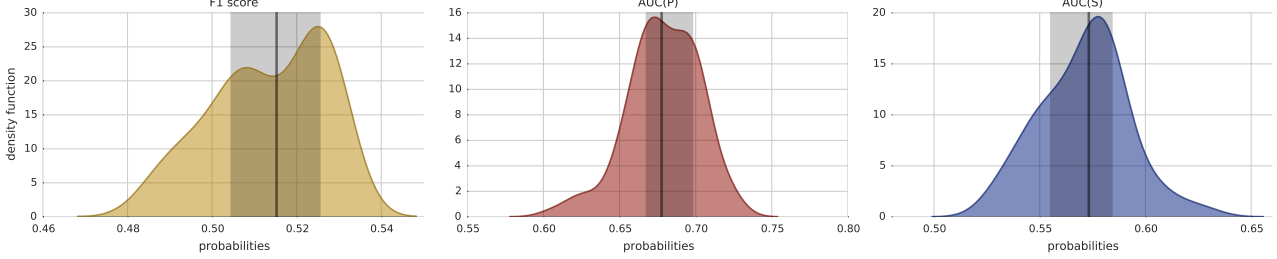

**Figure 5:** Distribution of quality measures across all **CHECK selection model (2 years shift)** configurations. The grey area shows interquartile range and thick vertical line indicates the median value. Tables show 3 top/bottom scores and corresponding model parameters.

ranking function: **sum** 0.45005  $+0.01600$

| size | N [589] |     | P [128] |     | S [205] |     | P+S [59] |     |
|------|---------|-----|---------|-----|---------|-----|----------|-----|
|      | abs     | rel | abs     | rel | abs     | rel | abs      | rel |
| 10   | 2       | 20% | 5 -1    | 50% | 1       | 10% | 2 +1     | 20% |
| 30   | 5       | 17% | 14 +1   | 47% | 2 -1    | 7%  | 9        | 30% |
| 60   | 13 -1   | 22% | 25      | 42% | 7 -1    | 12% | 15 +2    | 25% |
| 90   | 24 -3   | 27% | 35 +1   | 39% | 15 +2   | 17% | 16       | 18% |
| 120  | 39 +1   | 32% | 41 -1   | 34% | 20 -1   | 17% | 20 +1    | 17% |
| 150  | 54      | 36% | 46 -2   | 31% | 30 +3   | 20% | 20 -1    | 13% |

**configuration:** 200-entropy-2-d8

**$F_1$  score:** 0.51750 (38)  
**AUC(P):** 0.70572 (7)  
**AUC(S):** 0.61126 (3)

ranking function: **sum** 0.36628  $+0.01805$

| size | N [589] |     | P [128] |     | S [205] |     | P+S [59] |     |
|------|---------|-----|---------|-----|---------|-----|----------|-----|
|      | abs     | rel | abs     | rel | abs     | rel | abs      | rel |
| 10   | 1 -1    | 10% | 4 -2    | 40% | 1       | 10% | 4 +3     | 40% |
| 30   | 9 +4    | 30% | 11 -2   | 37% | 3       | 10% | 7 -2     | 23% |
| 60   | 18 +4   | 30% | 21 -4   | 35% | 10 +2   | 17% | 11 -2    | 18% |
| 90   | 27      | 30% | 32 -2   | 36% | 15 +2   | 17% | 16       | 18% |
| 120  | 37 -1   | 31% | 41 -1   | 34% | 23 +2   | 19% | 19       | 16% |
| 150  | 54      | 36% | 48      | 32% | 26 -1   | 17% | 22 +1    | 15% |

**configuration:** 100-gini-2-d8

**$F_1$  score:** 0.51450 (43)  
**AUC(P):** 0.62238 (83)  
**AUC(S):** 0.53503 (80)

ranking function: **scaled** 0.44934  $+0.01890$

| size | N [589] |     | P [128] |     | S [205] |     | P+S [59] |     |
|------|---------|-----|---------|-----|---------|-----|----------|-----|
|      | abs     | rel | abs     | rel | abs     | rel | abs      | rel |
| 10   | 0 -2    | 0%  | 7 +1    | 70% | 1       | 10% | 2 +1     | 20% |
| 30   | 7 +2    | 23% | 11 -2   | 37% | 5 +2    | 17% | 7 -2     | 23% |
| 60   | 14 -1   | 23% | 25 +1   | 42% | 9 +1    | 15% | 12 -1    | 20% |
| 90   | 26 -1   | 29% | 31 -3   | 34% | 16 +3   | 18% | 17 +1    | 19% |
| 120  | 38 -1   | 32% | 41 -1   | 34% | 22 +2   | 18% | 19       | 16% |
| 150  | 54      | 36% | 47 +1   | 31% | 30 +2   | 20% | 19 -3    | 13% |

**configuration:** 100-gini-2-d5

**$F_1$  score:** 0.52350 (29)  
**AUC(P):** 0.70094 (14)  
**AUC(S):** 0.58517 (18)

ranking function: **scaled** 0.37420  $+0.02643$

| size | N [589] |     | P [128] |     | S [205] |     | P+S [59] |     |
|------|---------|-----|---------|-----|---------|-----|----------|-----|
|      | abs     | rel | abs     | rel | abs     | rel | abs      | rel |
| 10   | 2       | 20% | 4 -2    | 40% | 1       | 10% | 3 +2     | 30% |
| 30   | 6 +1    | 20% | 13      | 43% | 2 -1    | 7%  | 9        | 30% |
| 60   | 14 -1   | 23% | 24      | 40% | 7 -1    | 12% | 15 +2    | 25% |
| 90   | 26 -1   | 29% | 32 -2   | 36% | 15 +2   | 17% | 17 +1    | 19% |
| 120  | 39      | 32% | 41 -1   | 34% | 20      | 17% | 20 +1    | 17% |
| 150  | 53 -1   | 35% | 46      | 31% | 31 +3   | 21% | 20 -2    | 13% |

**configuration:** 200-entropy-2-d8

**$F_1$  score:** 0.51750 (38)  
**AUC(P):** 0.70572 (7)  
**AUC(S):** 0.61126 (3)

ranking function: **zscore** 0.44890  $+0.02752$

| size | N [589] |     | P [128] |     | S [205] |     | P+S [59] |     |
|------|---------|-----|---------|-----|---------|-----|----------|-----|
|      | abs     | rel | abs     | rel | abs     | rel | abs      | rel |
| 10   | 2 -1    | 20% | 4 -1    | 40% | 2 +1    | 20% | 2 +1     | 20% |
| 30   | 4 -2    | 13% | 17 +4   | 57% | 5 +2    | 17% | 4 -4     | 13% |
| 60   | 13 -3   | 22% | 23 +2   | 38% | 10 +1   | 17% | 14       | 23% |
| 90   | 26      | 29% | 30 -3   | 33% | 16 +2   | 18% | 18 +1    | 20% |
| 120  | 40 +1   | 33% | 37 -2   | 31% | 24 +1   | 20% | 19       | 16% |
| 150  | 52      | 35% | 46      | 31% | 31 +1   | 21% | 21 -1    | 14% |

**configuration:** 100-entropy-2-d9

**$F_1$  score:** 0.50650 (59)  
**AUC(P):** 0.69862 (20)  
**AUC(S):** 0.62108 (2)

ranking function: **zscore** 0.38403  $+0.03131$

| size | N [589] |     | P [128] |     | S [205] |     | P+S [59] |     |
|------|---------|-----|---------|-----|---------|-----|----------|-----|
|      | abs     | rel | abs     | rel | abs     | rel | abs      | rel |
| 10   | 2 -1    | 20% | 3 -2    | 30% | 2 +1    | 20% | 3 +2     | 30% |
| 30   | 5 -1    | 17% | 12 -1   | 40% | 5 +2    | 17% | 8        | 27% |
| 60   | 17 +1   | 28% | 21      | 35% | 8 -1    | 13% | 14       | 23% |
| 90   | 29 +3   | 32% | 26 -7   | 29% | 19 +5   | 21% | 16 -1    | 18% |
| 120  | 45 +6   | 38% | 35 -4   | 29% | 21 -2   | 18% | 19       | 16% |
| 150  | 56 +4   | 37% | 44 -2   | 29% | 28 -2   | 19% | 22       | 15% |

**configuration:** 400-entropy-2-d8

**$F_1$  score:** 0.51750 (39)  
**AUC(P):** 0.66829 (60)  
**AUC(S):** 0.58640 (15)

(a) progressive weights

(b) split weights

**Table 6:** Results of simulated recruitment for the **CHECK selection model (2 years shift)** configurations with best recruitment score (given at the top of each table). The differences in recruitment compared to the model configuration with highest  $F_1$  score are highlighted with green (positive) and red (negative) colour. For each of the ranking functions the used model configuration and its prediction quality measured with  $F_1$  score and AUC is given for reference (rank of the measure among all configurations is given in brackets).

| $F_1$ score   | configuration    |
|---------------|------------------|
| <b>0.5475</b> | 1000-gini-2-d7   |
| <b>0.547</b>  | 800-gini-2-d7    |
| <b>0.5465</b> | 600-gini-2-d7    |
| ...           |                  |
| <b>0.509</b>  | 1000-gini-2-d4   |
| <b>0.5085</b> | 800-entropy-2-d4 |
| <b>0.508</b>  | 100-entropy-2-d4 |

| AUC(P)         | configuration     |
|----------------|-------------------|
| <b>0.72235</b> | 200-gini-2-d5     |
| <b>0.7162</b>  | 200-entropy-2-d9  |
| <b>0.71169</b> | 400-gini-2-d5     |
| ...            |                   |
| <b>0.62271</b> | 800-entropy-2-d7  |
| <b>0.61949</b> | 1000-entropy-2-d9 |
| <b>0.61639</b> | 200-gini-2-d8     |

| AUC(S)         | configuration     |
|----------------|-------------------|
| <b>0.61265</b> | 400-gini-2-d8     |
| <b>0.61033</b> | 100-entropy-2-d8  |
| <b>0.6094</b>  | 1000-entropy-2-d4 |
| ...            |                   |
| <b>0.51835</b> | 600-entropy-2-d10 |
| <b>0.51455</b> | 800-gini-2-d9     |
| <b>0.50736</b> | 200-gini-2-d6     |

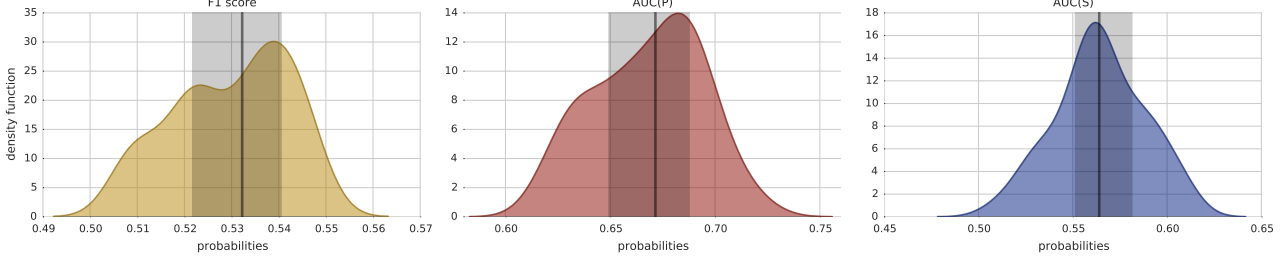

**Figure 6:** Distribution of quality measures across all PROCOAC selection model (2 years shift) configurations. The grey area shows interquartile range and thick vertical line indicates the median value. Tables show 3 top/bottom scores and corresponding model parameters.

ranking function: **sum** 0.45012 +0.05129

| size | N [600] |     | P [131] |     | S [209] |     | P+S [59] |     |
|------|---------|-----|---------|-----|---------|-----|----------|-----|
|      | abs     | rel | abs     | rel | abs     | rel | abs      | rel |
| 10   | 1 -3    | 10% | 6 +2    | 60% | 2       | 20% | 1 +1     | 10% |
| 30   | 5 -2    | 17% | 12 +2   | 40% | 6 -1    | 20% | 7 +1     | 23% |
| 60   | 13 -2   | 22% | 28 +4   | 47% | 9 -1    | 15% | 10 -1    | 17% |
| 90   | 24 -1   | 27% | 37 +2   | 41% | 14 -3   | 16% | 15 +2    | 17% |
| 120  | 36 -3   | 30% | 45 +4   | 38% | 22      | 18% | 17 -1    | 14% |
| 150  | 50 -5   | 33% | 52 +4   | 35% | 27 -1   | 18% | 21 +2    | 14% |

**$F_1$  score:** 0.50950 (81)  
**AUC(P):** 0.70460 (5)  
**AUC(S):** 0.60940 (3)

configuration: 1000-entropy-2-d4

ranking function: **sum** 0.36328 +0.02876

| size | N [600] |     | P [131] |     | S [209] |     | P+S [59] |     |
|------|---------|-----|---------|-----|---------|-----|----------|-----|
|      | abs     | rel | abs     | rel | abs     | rel | abs      | rel |
| 10   | 2 -2    | 20% | 5 +1    | 50% | 3 +1    | 30% | 0        | 0%  |
| 30   | 6 -1    | 20% | 10      | 33% | 6 -1    | 20% | 8 +2     | 27% |
| 60   | 11 -4   | 18% | 25 +1   | 42% | 13 +3   | 22% | 11       | 18% |
| 90   | 24 -1   | 27% | 35      | 39% | 15 -2   | 17% | 16 +3    | 18% |
| 120  | 38 -1   | 32% | 43 +2   | 36% | 22      | 18% | 17 -1    | 14% |
| 150  | 52 -3   | 35% | 51 +3   | 34% | 26 -2   | 17% | 21 +2    | 14% |

**$F_1$  score:** 0.52200 (62)  
**AUC(P):** 0.67133 (43)  
**AUC(S):** 0.56952 (32)

configuration: 200-entropy-2-d5

ranking function: **scaled** 0.45904 +0.06262

| size | N [600] |     | P [131] |     | S [209] |     | P+S [59] |     |
|------|---------|-----|---------|-----|---------|-----|----------|-----|
|      | abs     | rel | abs     | rel | abs     | rel | abs      | rel |
| 10   | 1 -3    | 10% | 5 +1    | 50% | 3 +1    | 30% | 1 +1     | 10% |
| 30   | 6 -2    | 20% | 11 +1   | 37% | 5 -1    | 17% | 8 +2     | 27% |
| 60   | 13      | 22% | 25 +1   | 42% | 11 -2   | 18% | 11 +1    | 18% |
| 90   | 21 -5   | 23% | 36 +3   | 40% | 19 +2   | 21% | 14       | 16% |
| 120  | 37 -5   | 31% | 42 +3   | 35% | 24 +3   | 20% | 17 -1    | 14% |
| 150  | 53 -1   | 35% | 48      | 32% | 30 +1   | 20% | 19       | 13% |

**$F_1$  score:** 0.50800 (84)  
**AUC(P):** 0.65652 (57)  
**AUC(S):** 0.59390 (10)

configuration: 100-entropy-2-d4

ranking function: **scaled** 0.37050 +0.03481

| size | N [600] |     | P [131] |     | S [209] |     | P+S [59] |     |
|------|---------|-----|---------|-----|---------|-----|----------|-----|
|      | abs     | rel | abs     | rel | abs     | rel | abs      | rel |
| 10   | 1 -3    | 10% | 5 +1    | 50% | 3 +1    | 30% | 1 +1     | 10% |
| 30   | 6 -2    | 20% | 11 +1   | 37% | 5 -1    | 17% | 8 +2     | 27% |
| 60   | 13      | 22% | 25 +1   | 42% | 11 -2   | 18% | 11 +1    | 18% |
| 90   | 21 -5   | 23% | 36 +3   | 40% | 19 +2   | 21% | 14       | 16% |
| 120  | 37 -5   | 31% | 42 +3   | 35% | 24 +3   | 20% | 17 -1    | 14% |
| 150  | 53 -1   | 35% | 48      | 32% | 30 +1   | 20% | 19       | 13% |

**$F_1$  score:** 0.50800 (84)  
**AUC(P):** 0.65652 (57)  
**AUC(S):** 0.59390 (10)

configuration: 100-entropy-2-d4

ranking function: **zscore** 0.43789 +0.05213

| size | N [600] |     | P [131] |     | S [209] |     | P+S [59] |     |
|------|---------|-----|---------|-----|---------|-----|----------|-----|
|      | abs     | rel | abs     | rel | abs     | rel | abs      | rel |
| 10   | 2 -1    | 20% | 4       | 40% | 3 +1    | 30% | 1        | 10% |
| 30   | 7 -1    | 23% | 9       | 30% | 8 +2    | 27% | 6 -1     | 20% |
| 60   | 17 -1   | 28% | 18 -2   | 30% | 13      | 22% | 12 +3    | 20% |
| 90   | 25 -7   | 28% | 29 +4   | 32% | 20 +3   | 22% | 16       | 18% |
| 120  | 37 -8   | 31% | 38 +2   | 32% | 25 +4   | 21% | 20 +2    | 17% |
| 150  | 51 -4   | 34% | 46 +2   | 31% | 33 +2   | 22% | 20       | 13% |

**$F_1$  score:** 0.50950 (79)  
**AUC(P):** 0.69462 (12)  
**AUC(S):** 0.59230 (11)

configuration: 400-entropy-2-d4

ranking function: **zscore** 0.38412 +0.03549

| size | N [600] |     | P [131] |     | S [209] |     | P+S [59] |     |
|------|---------|-----|---------|-----|---------|-----|----------|-----|
|      | abs     | rel | abs     | rel | abs     | rel | abs      | rel |
| 10   | 2 -1    | 20% | 4       | 40% | 3 +1    | 30% | 1        | 10% |
| 30   | 7 -1    | 23% | 9       | 30% | 8 +2    | 27% | 6 -1     | 20% |
| 60   | 17 -1   | 28% | 18 -2   | 30% | 13      | 22% | 12 +3    | 20% |
| 90   | 25 -7   | 28% | 29 +4   | 32% | 20 +3   | 22% | 16       | 18% |
| 120  | 37 -8   | 31% | 38 +2   | 32% | 25 +4   | 21% | 20 +2    | 17% |
| 150  | 51 -4   | 34% | 46 +2   | 31% | 33 +2   | 22% | 20       | 13% |

**$F_1$  score:** 0.50950 (79)  
**AUC(P):** 0.69462 (12)  
**AUC(S):** 0.59230 (11)

configuration: 400-entropy-2-d4

(a) progressive weights

(b) split weights

**Table 7:** Results of simulated recruitment for the PROCOAC selection model (2 years shift) configurations with best recruitment score (given at the top of each table). The differences in recruitment compared to the model configuration with highest  $F_1$  score are highlighted with green (positive) and red (negative) colour. For each of the ranking functions the used model configuration and its prediction quality measured with  $F_1$  score and AUC is given for reference (rank of the measure among all configurations is given in brackets).



| $F_1$ score   | configuration    | AUC(P)         | configuration     | AUC(S)         | configuration     |
|---------------|------------------|----------------|-------------------|----------------|-------------------|
| <b>0.671</b>  | 600-gini-2-d8    | <b>0.7579</b>  | 200-entropy-2-d10 | <b>0.50995</b> | 100-gini-2-d5     |
| <b>0.671</b>  | 800-gini-2-d8    | <b>0.74864</b> | 600-entropy-2-d10 | <b>0.49726</b> | 100-entropy-2-d10 |
| <b>0.671</b>  | 1000-gini-2-d8   | <b>0.73559</b> | 800-entropy-2-d10 | <b>0.47931</b> | 200-entropy-2-d8  |
| ...           |                  | ...            |                   | ...            |                   |
| <b>0.6195</b> | 400-entropy-2-d4 | <b>0.66532</b> | 400-entropy-2-d4  | <b>0.31457</b> | 600-gini-2-d9     |
| <b>0.6185</b> | 200-entropy-2-d4 | <b>0.66488</b> | 100-gini-2-d6     | <b>0.31423</b> | 600-entropy-2-d7  |
| <b>0.614</b>  | 100-entropy-2-d4 | <b>0.66409</b> | 600-entropy-2-d7  | <b>0.30115</b> | 100-entropy-2-d5  |

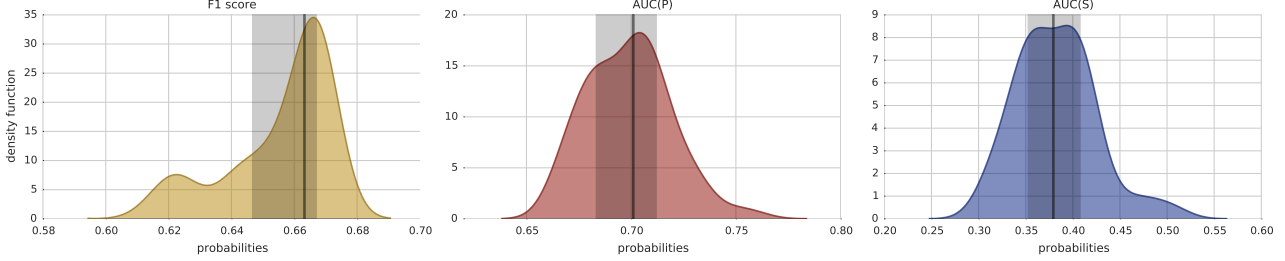

**eFigure 7:** Distribution of quality measures across all **PROCOAC** selection model (**3 years shift**) configurations. The grey area shows interquartile range and thick vertical line indicates the median value. Tables show 3 top/bottom scores and corresponding model parameters.

ranking function: **sum** 0.19963 +0.04667

| size | N [695] |     | P [115] |     | S [109] |     | P+S [24] |     |
|------|---------|-----|---------|-----|---------|-----|----------|-----|
|      | abs     | rel | abs     | rel | abs     | rel | abs      | rel |
| 10   | 4 -1    | 40% | 6 +2    | 60% | 0       | 0%  | 0 -1     | 0%  |
| 30   | 12 -4   | 40% | 14 +3   | 47% | 2       | 7%  | 2 +1     | 7%  |
| 60   | 26 -5   | 43% | 27 +6   | 45% | 3 -1    | 5%  | 4        | 7%  |
| 90   | 41 -5   | 46% | 38 +2   | 42% | 7 +3    | 8%  | 4        | 4%  |
| 120  | 62      | 52% | 44      | 37% | 10      | 8%  | 4        | 3%  |
| 150  | 78 -1   | 52% | 52 +1   | 35% | 13 +1   | 9%  | 7 -1     | 5%  |

**configuration:**  
600-gini-2-d4  
 $F_1$  score: 0.62550 (75)  
AUC(P): 0.67687 (72)  
AUC(S): 0.39203 (35)

ranking function: **sum** 0.16284 +0.01514

| size | N [695] |     | P [115] |     | S [109] |     | P+S [24] |     |
|------|---------|-----|---------|-----|---------|-----|----------|-----|
|      | abs     | rel | abs     | rel | abs     | rel | abs      | rel |
| 10   | 5       | 50% | 4       | 40% | 0       | 0%  | 1        | 10% |
| 30   | 12 -4   | 40% | 13 +2   | 43% | 3 +1    | 10% | 2 +1     | 7%  |
| 60   | 26 -5   | 43% | 26 +5   | 43% | 4       | 7%  | 4        | 7%  |
| 90   | 43 -3   | 48% | 38 +2   | 42% | 5 +1    | 6%  | 4        | 4%  |
| 120  | 60 -2   | 50% | 46 +2   | 38% | 10      | 8%  | 4        | 3%  |
| 150  | 81 +2   | 54% | 51      | 34% | 12      | 8%  | 6 -2     | 4%  |

**configuration:**  
1000-gini-2-d5  
 $F_1$  score: 0.64700 (63)  
AUC(P): 0.69741 (46)  
AUC(S): 0.34269 (72)

ranking function: **scaled** 0.17176 +0.07243

| size | N [695] |     | P [115] |     | S [109] |     | P+S [24] |     |
|------|---------|-----|---------|-----|---------|-----|----------|-----|
|      | abs     | rel | abs     | rel | abs     | rel | abs      | rel |
| 10   | 4 -3    | 40% | 6 +4    | 60% | 0       | 0%  | 0 -1     | 0%  |
| 30   | 13 -4   | 43% | 14 +4   | 47% | 2       | 7%  | 1        | 3%  |
| 60   | 31 -3   | 52% | 22 +3   | 37% | 3 -1    | 5%  | 4 +1     | 7%  |
| 90   | 45 -7   | 50% | 34 +4   | 38% | 7 +3    | 8%  | 4        | 4%  |
| 120  | 62 -7   | 52% | 45 +4   | 38% | 8 +4    | 7%  | 5 -1     | 4%  |
| 150  | 77 -8   | 51% | 54 +8   | 36% | 12 +1   | 8%  | 7 -1     | 5%  |

**configuration:**  
200-entropy-2-d4  
 $F_1$  score: 0.61850 (83)  
AUC(P): 0.67400 (76)  
AUC(S): 0.38778 (39)

ranking function: **scaled** 0.14999 +0.01797

| size | N [695] |     | P [115] |     | S [109] |     | P+S [24] |     |
|------|---------|-----|---------|-----|---------|-----|----------|-----|
|      | abs     | rel | abs     | rel | abs     | rel | abs      | rel |
| 10   | 5 -2    | 50% | 3 +1    | 30% | 1 +1    | 10% | 1        | 10% |
| 30   | 17      | 57% | 10      | 33% | 2       | 7%  | 1        | 3%  |
| 60   | 32 -2   | 53% | 23 +4   | 38% | 2 -2    | 3%  | 3        | 5%  |
| 90   | 47 -5   | 52% | 31 +1   | 34% | 7 +3    | 8%  | 5 +1     | 6%  |
| 120  | 62 -7   | 52% | 44 +3   | 37% | 8 +4    | 7%  | 6        | 5%  |
| 150  | 83 -2   | 55% | 50 +4   | 33% | 11      | 7%  | 6 -2     | 4%  |

**configuration:**  
200-entropy-2-d5  
 $F_1$  score: 0.63850 (71)  
AUC(P): 0.70149 (42)  
AUC(S): 0.41199 (20)

ranking function: **zscore** 0.10859 +0.07952

| size | N [695] |     | P [115] |     | S [109] |     | P+S [24] |     |
|------|---------|-----|---------|-----|---------|-----|----------|-----|
|      | abs     | rel | abs     | rel | abs     | rel | abs      | rel |
| 10   | 5 -3    | 50% | 5 +4    | 50% | 0 -1    | 0%  | 0        | 0%  |
| 30   | 16 -4   | 53% | 12 +4   | 40% | 1       | 3%  | 1        | 3%  |
| 60   | 34 -6   | 57% | 21 +5   | 35% | 2 -1    | 3%  | 3 +2     | 5%  |
| 90   | 52 -6   | 58% | 27 +2   | 30% | 4       | 4%  | 7 +4     | 8%  |
| 120  | 73 -3   | 61% | 34 +2   | 28% | 6 +1    | 5%  | 7        | 6%  |
| 150  | 91 -3   | 61% | 42 +3   | 28% | 9       | 6%  | 8        | 5%  |

**configuration:**  
600-entropy-2-d4  
 $F_1$  score: 0.62050 (79)  
AUC(P): 0.68470 (61)  
AUC(S): 0.45113 (6)

ranking function: **zscore** 0.13388 +0.02925

| size | N [695] |     | P [115] |     | S [109] |     | P+S [24] |     |
|------|---------|-----|---------|-----|---------|-----|----------|-----|
|      | abs     | rel | abs     | rel | abs     | rel | abs      | rel |
| 10   | 4 -4    | 40% | 4 +3    | 40% | 1       | 10% | 1 +1     | 10% |
| 30   | 18 -2   | 60% | 10 +2   | 33% | 1       | 3%  | 1        | 3%  |
| 60   | 39 -1   | 65% | 16      | 27% | 3       | 5%  | 2 +1     | 3%  |
| 90   | 54 -4   | 60% | 27 +2   | 30% | 6 +2    | 7%  | 3        | 3%  |
| 120  | 73 -3   | 61% | 32      | 27% | 9 +4    | 8%  | 6 -1     | 5%  |
| 150  | 94      | 63% | 36 -3   | 24% | 12 +3   | 8%  | 8        | 5%  |

**configuration:**  
100-entropy-2-d6  
 $F_1$  score: 0.65200 (60)  
AUC(P): 0.66777 (81)  
AUC(S): 0.33462 (75)

(a) progressive weights

(b) split weights

**eTable 8:** Results of simulated recruitment for the **PROCOAC** selection model (**3 years shift**) configurations with best recruitment score (given at the top of each table). The differences in recruitment compared to the model configuration with highest  $F_1$  score are highlighted with **green** (positive) and **red** (negative) colour. For each of the ranking functions the used model configuration and its prediction quality measured with  $F_1$  score and AUC is given for reference (rank of the measure among all configurations is given in brackets).

| $F_1$ score   | configuration    |
|---------------|------------------|
| <b>0.665</b>  | 400-entropy-2-d9 |
| <b>0.6645</b> | 200-entropy-2-d9 |
| <b>0.6645</b> | 800-entropy-2-d9 |
| ...           |                  |
| <b>0.6095</b> | 600-entropy-2-d4 |
| <b>0.608</b>  | 200-entropy-2-d4 |
| <b>0.6045</b> | 100-entropy-2-d4 |

| AUC(P)         | configuration     |
|----------------|-------------------|
| <b>0.74779</b> | 100-entropy-2-d10 |
| <b>0.73464</b> | 800-gini-2-d10    |
| <b>0.72941</b> | 1000-gini-2-d10   |
| ...            |                   |
| <b>0.61348</b> | 400-entropy-2-d8  |
| <b>0.60744</b> | 200-gini-2-d6     |
| <b>0.60453</b> | 100-entropy-2-d7  |

| AUC(S)         | configuration     |
|----------------|-------------------|
| <b>0.54454</b> | 100-entropy-2-d8  |
| <b>0.52455</b> | 100-entropy-2-d7  |
| <b>0.52258</b> | 200-gini-2-d5     |
| ...            |                   |
| <b>0.37827</b> | 1000-entropy-2-d8 |
| <b>0.37705</b> | 400-entropy-2-d7  |
| <b>0.37631</b> | 200-entropy-2-d10 |

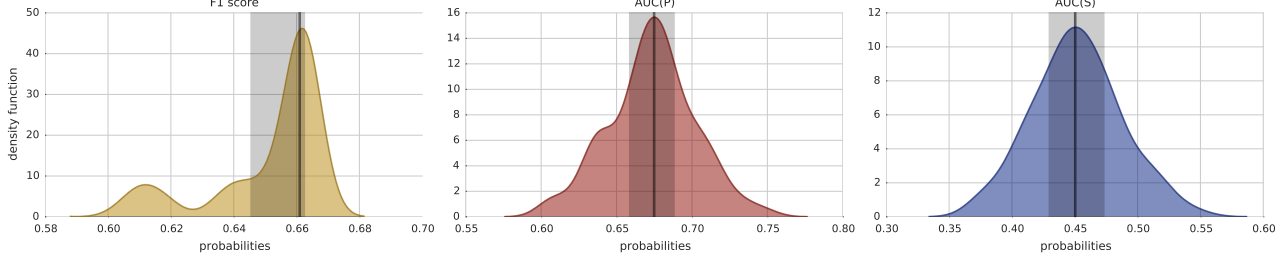

**Figure 8:** Distribution of quality measures across all PROCOAC selection model (5 years shift) configurations. The grey area shows interquartile range and thick vertical line indicates the median value. Tables show 3 top/bottom scores and corresponding model parameters.

| ranking function: <b>sum</b> |         |     |                                             |     |         |     |          |     | 0.12759 +0.08711 |     |
|------------------------------|---------|-----|---------------------------------------------|-----|---------|-----|----------|-----|------------------|-----|
| size                         | N [748] |     | P [115]                                     |     | S [109] |     | P+S [25] |     | abs              | rel |
|                              | abs     | rel | abs                                         | rel | abs     | rel | abs      | rel |                  |     |
| 10                           | 3 -4    | 30% | 6 +3                                        | 60% | 1 +1    | 10% | 0        | 0%  |                  |     |
| 30                           | 15 -2   | 50% | 12 +2                                       | 40% | 2       | 7%  | 1        | 3%  |                  |     |
| 60                           | 36 -3   | 60% | 17                                          | 28% | 4 +1    | 7%  | 3 +2     | 5%  |                  |     |
| 90                           | 53 -5   | 59% | 26 +3                                       | 29% | 7 +1    | 8%  | 4 +1     | 4%  |                  |     |
| 120                          | 72 -11  | 60% | 33 +8                                       | 28% | 10 +2   | 8%  | 5 +1     | 4%  |                  |     |
| 150                          | 90 -10  | 60% | 42 +10                                      | 28% | 12 -1   | 8%  | 6 +1     | 4%  |                  |     |
| <b>configuration:</b>        |         |     | <b><math>F_1</math> score:</b> 0.61450 (77) |     |         |     |          |     |                  |     |
| 200-gini-2-d4                |         |     | <b>AUC(P):</b> 0.67888 (35)                 |     |         |     |          |     |                  |     |
|                              |         |     | <b>AUC(S):</b> 0.47582 (19)                 |     |         |     |          |     |                  |     |

| ranking function: <b>sum</b> |         |     |                                             |     |         |     |          |     | 0.14726 +0.04191 |     |
|------------------------------|---------|-----|---------------------------------------------|-----|---------|-----|----------|-----|------------------|-----|
| size                         | N [748] |     | P [115]                                     |     | S [109] |     | P+S [25] |     | abs              | rel |
|                              | abs     | rel | abs                                         | rel | abs     | rel | abs      | rel |                  |     |
| 10                           | 6 -1    | 60% | 1 -2                                        | 10% | 2 +2    | 20% | 1 +1     | 10% |                  |     |
| 30                           | 17      | 57% | 9 -1                                        | 30% | 3 +1    | 10% | 1        | 3%  |                  |     |
| 60                           | 35 -4   | 58% | 17                                          | 28% | 5 +2    | 8%  | 3 +2     | 5%  |                  |     |
| 90                           | 56 -2   | 62% | 24 +1                                       | 27% | 6       | 7%  | 4 +1     | 4%  |                  |     |
| 120                          | 78 -5   | 65% | 30 +5                                       | 25% | 8       | 7%  | 4        | 3%  |                  |     |
| 150                          | 99 -1   | 66% | 37 +5                                       | 25% | 9 -4    | 6%  | 5        | 3%  |                  |     |
| <b>configuration:</b>        |         |     | <b><math>F_1</math> score:</b> 0.66200 (35) |     |         |     |          |     |                  |     |
| 100-gini-2-d9                |         |     | <b>AUC(P):</b> 0.66996 (49)                 |     |         |     |          |     |                  |     |
|                              |         |     | <b>AUC(S):</b> 0.41570 (70)                 |     |         |     |          |     |                  |     |

| ranking function: <b>scaled</b> |         |     |                                             |     |         |     |          |     | 0.11106 +0.10766 |     |
|---------------------------------|---------|-----|---------------------------------------------|-----|---------|-----|----------|-----|------------------|-----|
| size                            | N [748] |     | P [115]                                     |     | S [109] |     | P+S [25] |     | abs              | rel |
|                                 | abs     | rel | abs                                         | rel | abs     | rel | abs      | rel |                  |     |
| 10                              | 4 -3    | 40% | 5 +2                                        | 50% | 1 +1    | 10% | 0        | 0%  |                  |     |
| 30                              | 16 -4   | 53% | 10 +3                                       | 33% | 3 +1    | 10% | 1        | 3%  |                  |     |
| 60                              | 36 -7   | 60% | 18 +6                                       | 30% | 3 -1    | 5%  | 3 +2     | 5%  |                  |     |
| 90                              | 55 -8   | 61% | 24 +5                                       | 27% | 7       | 8%  | 4 +3     | 4%  |                  |     |
| 120                             | 72 -11  | 60% | 31 +6                                       | 26% | 12 +2   | 10% | 5 +3     | 4%  |                  |     |
| 150                             | 93 -10  | 62% | 38 +6                                       | 25% | 13 +1   | 9%  | 6 +3     | 4%  |                  |     |
| <b>configuration:</b>           |         |     | <b><math>F_1</math> score:</b> 0.61100 (78) |     |         |     |          |     |                  |     |
| 100-gini-2-d4                   |         |     | <b>AUC(P):</b> 0.67596 (40)                 |     |         |     |          |     |                  |     |
|                                 |         |     | <b>AUC(S):</b> 0.45560 (37)                 |     |         |     |          |     |                  |     |

| ranking function: <b>scaled</b> |         |     |                                             |     |         |     |          |     | 0.14087 +0.04530 |     |
|---------------------------------|---------|-----|---------------------------------------------|-----|---------|-----|----------|-----|------------------|-----|
| size                            | N [748] |     | P [115]                                     |     | S [109] |     | P+S [25] |     | abs              | rel |
|                                 | abs     | rel | abs                                         | rel | abs     | rel | abs      | rel |                  |     |
| 10                              | 4 -3    | 40% | 5 +2                                        | 50% | 1 +1    | 10% | 0        | 0%  |                  |     |
| 30                              | 16 -4   | 53% | 10 +3                                       | 33% | 3 +1    | 10% | 1        | 3%  |                  |     |
| 60                              | 36 -7   | 60% | 18 +6                                       | 30% | 3 -1    | 5%  | 3 +2     | 5%  |                  |     |
| 90                              | 55 -8   | 61% | 24 +5                                       | 27% | 7       | 8%  | 4 +3     | 4%  |                  |     |
| 120                             | 72 -11  | 60% | 31 +6                                       | 26% | 12 +2   | 10% | 5 +3     | 4%  |                  |     |
| 150                             | 93 -10  | 62% | 38 +6                                       | 25% | 13 +1   | 9%  | 6 +3     | 4%  |                  |     |
| <b>configuration:</b>           |         |     | <b><math>F_1</math> score:</b> 0.61100 (78) |     |         |     |          |     |                  |     |
| 100-gini-2-d4                   |         |     | <b>AUC(P):</b> 0.67596 (40)                 |     |         |     |          |     |                  |     |
|                                 |         |     | <b>AUC(S):</b> 0.45560 (37)                 |     |         |     |          |     |                  |     |

| ranking function: <b>zscore</b> |         |     |                                             |     |         |     |          |     | 0.06046 +0.09153 |     |
|---------------------------------|---------|-----|---------------------------------------------|-----|---------|-----|----------|-----|------------------|-----|
| size                            | N [748] |     | P [115]                                     |     | S [109] |     | P+S [25] |     | abs              | rel |
|                                 | abs     | rel | abs                                         | rel | abs     | rel | abs      | rel |                  |     |
| 10                              | 6 -2    | 60% | 3 +1                                        | 30% | 1 +1    | 10% | 0        | 0%  |                  |     |
| 30                              | 18 -4   | 60% | 10 +4                                       | 33% | 1       | 3%  | 1        | 3%  |                  |     |
| 60                              | 39 -6   | 65% | 15 +5                                       | 25% | 4       | 7%  | 2 +1     | 3%  |                  |     |
| 90                              | 56 -10  | 62% | 19 +4                                       | 21% | 11 +3   | 12% | 4 +3     | 4%  |                  |     |
| 120                             | 80 -6   | 67% | 25 +4                                       | 21% | 11      | 9%  | 4 +2     | 3%  |                  |     |
| 150                             | 101 -7  | 67% | 30 +2                                       | 20% | 15 +3   | 10% | 4 +2     | 3%  |                  |     |
| <b>configuration:</b>           |         |     | <b><math>F_1</math> score:</b> 0.61100 (78) |     |         |     |          |     |                  |     |
| 100-gini-2-d4                   |         |     | <b>AUC(P):</b> 0.67596 (40)                 |     |         |     |          |     |                  |     |
|                                 |         |     | <b>AUC(S):</b> 0.45560 (37)                 |     |         |     |          |     |                  |     |

| ranking function: <b>zscore</b> |         |     |                                             |     |         |     |          |     | 0.12757 +0.04001 |     |
|---------------------------------|---------|-----|---------------------------------------------|-----|---------|-----|----------|-----|------------------|-----|
| size                            | N [748] |     | P [115]                                     |     | S [109] |     | P+S [25] |     | abs              | rel |
|                                 | abs     | rel | abs                                         | rel | abs     | rel | abs      | rel |                  |     |
| 10                              | 6 -2    | 60% | 3 +1                                        | 30% | 1 +1    | 10% | 0        | 0%  |                  |     |
| 30                              | 18 -4   | 60% | 10 +4                                       | 33% | 1       | 3%  | 1        | 3%  |                  |     |
| 60                              | 39 -6   | 65% | 15 +5                                       | 25% | 4       | 7%  | 2 +1     | 3%  |                  |     |
| 90                              | 56 -10  | 62% | 19 +4                                       | 21% | 11 +3   | 12% | 4 +3     | 4%  |                  |     |
| 120                             | 80 -6   | 67% | 25 +4                                       | 21% | 11      | 9%  | 4 +2     | 3%  |                  |     |
| 150                             | 101 -7  | 67% | 30 +2                                       | 20% | 15 +3   | 10% | 4 +2     | 3%  |                  |     |
| <b>configuration:</b>           |         |     | <b><math>F_1</math> score:</b> 0.61100 (78) |     |         |     |          |     |                  |     |
| 100-gini-2-d4                   |         |     | <b>AUC(P):</b> 0.67596 (40)                 |     |         |     |          |     |                  |     |
|                                 |         |     | <b>AUC(S):</b> 0.45560 (37)                 |     |         |     |          |     |                  |     |

(a) progressive weights

(b) split weights

**Table 9:** Results of simulated recruitment for the PROCOAC selection model (5 years shift) configurations with best recruitment score (given at the top of each table). The differences in recruitment compared to the model configuration with highest  $F_1$  score are highlighted with green (positive) and red (negative) colour. For each of the ranking functions the used model configuration and its prediction quality measured with  $F_1$  score and AUC is given for reference (rank of the measure among all configurations is given in brackets).

| $F_1$ score   | configuration    | AUC(P)         | configuration    | AUC(S)         | configuration     |
|---------------|------------------|----------------|------------------|----------------|-------------------|
| <b>0.5075</b> | 600-gini-2-d10   | <b>0.77101</b> | 400-gini-2-d9    | <b>0.62573</b> | 100-entropy-2-d9  |
| <b>0.5075</b> | 200-gini-2-d10   | <b>0.7691</b>  | 200-gini-2-d9    | <b>0.61445</b> | 600-gini-2-d9     |
| <b>0.5075</b> | 800-gini-2-d10   | <b>0.76522</b> | 1000-gini-2-d9   | <b>0.61146</b> | 400-gini-2-d9     |
| ...           |                  | ...            |                  | ...            |                   |
| <b>0.4055</b> | 200-entropy-2-d4 | <b>0.67686</b> | 800-gini-2-d5    | <b>0.51838</b> | 100-gini-2-d10    |
| <b>0.4055</b> | 400-entropy-2-d4 | <b>0.67596</b> | 100-gini-2-d5    | <b>0.51642</b> | 1000-entropy-2-d4 |
| <b>0.4055</b> | 600-gini-2-d4    | <b>0.6497</b>  | 200-entropy-2-d4 | <b>0.49083</b> | 800-gini-2-d4     |

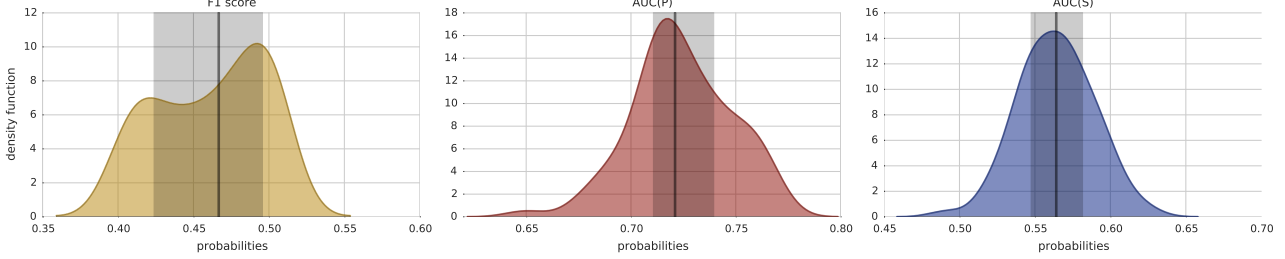

**Figure 9:** Distribution of quality measures across all DIGICOD selection model (no shift) configurations. The grey area shows interquartile range and thick vertical line indicates the median value. Tables show 3 top/bottom scores and corresponding model parameters.

ranking function: **sum** 0.40107 +0.05096

| size | N [1749] |     | P [358] |     | S [591] |     | P+S [160] |     |
|------|----------|-----|---------|-----|---------|-----|-----------|-----|
|      | abs      | rel | abs     | rel | abs     | rel | abs       | rel |
| 10   | 0 -2     | 0%  | 3       | 30% | 2       | 20% | 5 +2      | 50% |
| 30   | 7 -1     | 23% | 12 +2   | 40% | 3 -1    | 10% | 8         | 27% |
| 60   | 19 -4    | 32% | 25 +7   | 42% | 4 -4    | 7%  | 12 +1     | 20% |
| 90   | 33 -5    | 37% | 35 +12  | 39% | 6 -9    | 7%  | 16 +2     | 18% |
| 120  | 52 -3    | 43% | 43 +13  | 36% | 7 -12   | 6%  | 18 +2     | 15% |
| 150  | 65 -8    | 43% | 49 +11  | 33% | 16 -7   | 11% | 20 +4     | 13% |

**configuration:** 800-entropy-2-d6

**F<sub>1</sub> score:** 0.44600 (54)  
**AUC(P):** 0.73757 (23)  
**AUC(S):** 0.57591 (25)

ranking function: **sum** 0.34905 +0.01120

| size | N [1749] |     | P [358] |     | S [591] |     | P+S [160] |     |
|------|----------|-----|---------|-----|---------|-----|-----------|-----|
|      | abs      | rel | abs     | rel | abs     | rel | abs       | rel |
| 10   | 1 -1     | 10% | 4 +1    | 40% | 2       | 20% | 3         | 30% |
| 30   | 7 -1     | 23% | 12 +2   | 40% | 4       | 13% | 7 -1      | 23% |
| 60   | 25 +2    | 42% | 15 -3   | 25% | 9 +1    | 15% | 11        | 18% |
| 90   | 38       | 42% | 21 -2   | 23% | 16 +1   | 18% | 15 +1     | 17% |
| 120  | 53 -2    | 44% | 27 -3   | 22% | 23 +4   | 19% | 17 +1     | 14% |
| 150  | 65 -8    | 43% | 39 +1   | 26% | 28 +5   | 19% | 18 +2     | 12% |

**configuration:** 100-gini-2-d10

**F<sub>1</sub> score:** 0.50600 (6)  
**AUC(P):** 0.72094 (43)  
**AUC(S):** 0.51838 (82)

ranking function: **scaled** 0.40534 +0.10619

| size | N [1749] |     | P [358] |     | S [591] |     | P+S [160] |     |
|------|----------|-----|---------|-----|---------|-----|-----------|-----|
|      | abs      | rel | abs     | rel | abs     | rel | abs       | rel |
| 10   | 0 -3     | 0%  | 3 +1    | 30% | 2       | 20% | 5 +2      | 50% |
| 30   | 6 -3     | 20% | 15 +5   | 50% | 3 -1    | 10% | 6 -1      | 20% |
| 60   | 18 -9    | 30% | 25 +11  | 42% | 4 -6    | 7%  | 13 +4     | 22% |
| 90   | 35 -9    | 39% | 33 +13  | 37% | 7 -7    | 8%  | 15 +3     | 17% |
| 120  | 50 -12   | 42% | 41 +17  | 34% | 12 -8   | 10% | 17 +3     | 14% |
| 150  | 63 -12   | 42% | 46 +13  | 31% | 20 -4   | 13% | 21 +3     | 14% |

**configuration:** 400-entropy-2-d5

**F<sub>1</sub> score:** 0.42200 (71)  
**AUC(P):** 0.73463 (29)  
**AUC(S):** 0.59744 (8)

ranking function: **scaled** 0.35374 +0.03652

| size | N [1749] |     | P [358] |     | S [591] |     | P+S [160] |     |
|------|----------|-----|---------|-----|---------|-----|-----------|-----|
|      | abs      | rel | abs     | rel | abs     | rel | abs       | rel |
| 10   | 1 -2     | 10% | 2       | 20% | 2       | 20% | 5 +2      | 50% |
| 30   | 8 -1     | 27% | 10      | 33% | 2 -2    | 7%  | 10 +3     | 33% |
| 60   | 22 -5    | 37% | 22 +8   | 37% | 4 -6    | 7%  | 12 +3     | 20% |
| 90   | 34 -10   | 38% | 34 +14  | 38% | 7 -7    | 8%  | 15 +3     | 17% |
| 120  | 47 -15   | 39% | 40 +16  | 33% | 15 -5   | 12% | 18 +4     | 15% |
| 150  | 61 -14   | 41% | 46 +13  | 31% | 23 -1   | 15% | 20 +2     | 13% |

**configuration:** 200-gini-2-d6

**F<sub>1</sub> score:** 0.44600 (53)  
**AUC(P):** 0.70588 (69)  
**AUC(S):** 0.56553 (42)

ranking function: **zscore** 0.37788 +0.07958

| size | N [1749] |     | P [358] |     | S [591] |     | P+S [160] |     |
|------|----------|-----|---------|-----|---------|-----|-----------|-----|
|      | abs      | rel | abs     | rel | abs     | rel | abs       | rel |
| 10   | 1 -2     | 10% | 2       | 20% | 2       | 20% | 5 +2      | 50% |
| 30   | 8 -1     | 27% | 12 +2   | 40% | 2 -2    | 7%  | 8 +1      | 27% |
| 60   | 21 -6    | 35% | 23 +9   | 38% | 5 -5    | 8%  | 11 +2     | 18% |
| 90   | 37 -7    | 41% | 29 +9   | 32% | 10 -4   | 11% | 14 +2     | 16% |
| 120  | 51 -12   | 42% | 36 +13  | 30% | 16 -4   | 13% | 17 +3     | 14% |
| 150  | 65 -10   | 43% | 43 +11  | 29% | 22 -3   | 15% | 20 +2     | 13% |

**configuration:** 400-entropy-2-d5

**F<sub>1</sub> score:** 0.42200 (71)  
**AUC(P):** 0.73463 (29)  
**AUC(S):** 0.59744 (8)

ranking function: **zscore** 0.35132 +0.03387

| size | N [1749] |     | P [358] |     | S [591] |     | P+S [160] |     |
|------|----------|-----|---------|-----|---------|-----|-----------|-----|
|      | abs      | rel | abs     | rel | abs     | rel | abs       | rel |
| 10   | 2 -1     | 20% | 1 -1    | 10% | 2       | 20% | 5 +2      | 50% |
| 30   | 11 +2    | 37% | 8 -2    | 27% | 3 -1    | 10% | 8 +1      | 27% |
| 60   | 26 -1    | 43% | 17 +3   | 28% | 6 -4    | 10% | 11 +2     | 18% |
| 90   | 36 -8    | 40% | 24 +4   | 27% | 16 +2   | 18% | 14 +2     | 16% |
| 120  | 55 -8    | 46% | 30 +7   | 25% | 18 -2   | 15% | 17 +3     | 14% |
| 150  | 70 -5    | 47% | 35 +3   | 23% | 27 +2   | 18% | 18        | 12% |

**configuration:** 100-gini-2-d8

**F<sub>1</sub> score:** 0.48500 (30)  
**AUC(P):** 0.74470 (19)  
**AUC(S):** 0.56772 (37)

(a) progressive weights

(b) split weights

**Table 10:** Results of simulated recruitment for the DIGICOD selection model (no shift) configurations with best recruitment score (given at the top of each table). The differences in recruitment compared to the model configuration with highest  $F_1$  score are highlighted with green (positive) and red (negative) colour. For each of the ranking functions the used model configuration and its prediction quality measured with  $F_1$  score and AUC is given for reference (rank of the measure among all configurations is given in brackets).

| $F_1$ score   | configuration    | AUC(P)         | configuration    | AUC(S)         | configuration    |
|---------------|------------------|----------------|------------------|----------------|------------------|
| <b>0.488</b>  | 800-entropy-2-d7 | <b>0.69284</b> | 600-entropy-2-d7 | <b>0.66614</b> | 100-entropy-2-d5 |
| <b>0.4875</b> | 1000-gini-2-d6   | <b>0.69242</b> | 1000-gini-2-d9   | <b>0.63768</b> | 200-gini-2-d9    |
| <b>0.4875</b> | 600-gini-2-d6    | <b>0.68539</b> | 600-gini-2-d9    | <b>0.63185</b> | 100-gini-2-d9    |
| ...           |                  | ...            |                  | ...            |                  |
| <b>0.4675</b> | 100-gini-2-d4    | <b>0.60083</b> | 100-gini-2-d10   | <b>0.50369</b> | 200-gini-2-d6    |
| <b>0.4675</b> | 200-entropy-2-d4 | <b>0.59814</b> | 600-gini-2-d5    | <b>0.50276</b> | 800-gini-2-d8    |
| <b>0.467</b>  | 100-entropy-2-d4 | <b>0.59669</b> | 100-entropy-2-d5 | <b>0.49902</b> | 100-entropy-2-d7 |

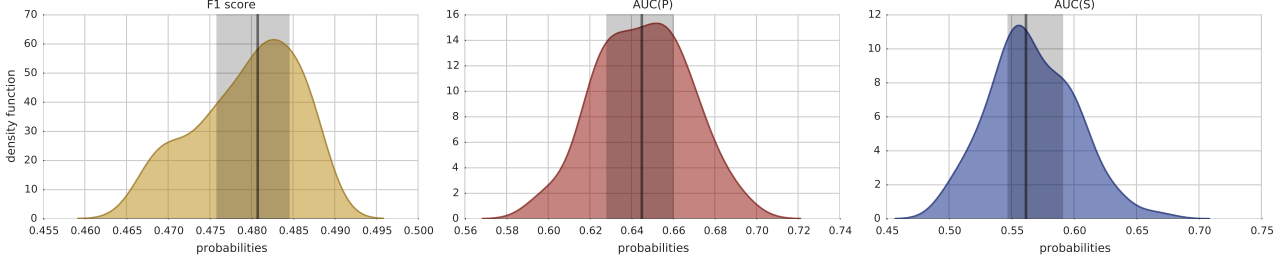

**eFigure 10:** Distribution of quality measures across all **DIGICOD selection model (2 years shift)** configurations. The grey area shows interquartile range and thick vertical line indicates the median value. Tables show 3 top/bottom scores and corresponding model parameters.

ranking function: **sum** 0.27076 +0.04159

| size | N [601] |     | P [131] |     | S [210] |     | P+S [59] |     |
|------|---------|-----|---------|-----|---------|-----|----------|-----|
|      | abs     | rel | abs     | rel | abs     | rel | abs      | rel |
| 10   | 3       | 30% | 5 -1    | 50% | 1 +1    | 10% | 1        | 10% |
| 30   | 13 -1   | 43% | 11 -1   | 37% | 4 +3    | 13% | 2 -1     | 7%  |
| 60   | 26 -3   | 43% | 18 +2   | 30% | 8       | 13% | 8 +1     | 13% |
| 90   | 39 -3   | 43% | 24 +1   | 27% | 15      | 17% | 12 +2    | 13% |
| 120  | 57 -5   | 48% | 30      | 25% | 20 +3   | 17% | 13 +2    | 11% |
| 150  | 70 -10  | 47% | 36 +3   | 24% | 29 +4   | 19% | 15 +3    | 10% |

**$F_1$  score:** 0.46900 (79)  
**AUC(P):** 0.64130 (48)  
**AUC(S):** 0.58921 (23)

configuration: 400-entropy-2-d4

ranking function: **sum** 0.27167 +0.04236

| size | N [601] |     | P [131] |     | S [210] |     | P+S [59] |     |
|------|---------|-----|---------|-----|---------|-----|----------|-----|
|      | abs     | rel | abs     | rel | abs     | rel | abs      | rel |
| 10   | 4 +1    | 40% | 3 -3    | 30% | 1 +1    | 10% | 2 +1     | 20% |
| 30   | 14      | 47% | 10 -2   | 33% | 3 +2    | 10% | 3        | 10% |
| 60   | 23 -6   | 38% | 20 +4   | 33% | 9 +1    | 15% | 8 +1     | 13% |
| 90   | 40 -2   | 44% | 23      | 26% | 15      | 17% | 12 +2    | 13% |
| 120  | 59 -3   | 49% | 28 -2   | 23% | 20 +3   | 17% | 13 +2    | 11% |
| 150  | 76 -4   | 51% | 33      | 22% | 25      | 17% | 16 +4    | 11% |

**$F_1$  score:** 0.46750 (82)  
**AUC(P):** 0.64346 (45)  
**AUC(S):** 0.59745 (16)

configuration: 100-gini-2-d4

ranking function: **scaled** 0.27646 +0.07134

| size | N [601] |     | P [131] |     | S [210] |     | P+S [59] |     |
|------|---------|-----|---------|-----|---------|-----|----------|-----|
|      | abs     | rel | abs     | rel | abs     | rel | abs      | rel |
| 10   | 3 -1    | 30% | 6       | 60% | 0       | 0%  | 1 +1     | 10% |
| 30   | 13 -2   | 43% | 10 +1   | 33% | 4 +2    | 13% | 3 -1     | 10% |
| 60   | 25 -4   | 42% | 17 +1   | 28% | 9 +1    | 15% | 9 +2     | 15% |
| 90   | 39 -7   | 43% | 24 +3   | 27% | 15 +2   | 17% | 12 +2    | 13% |
| 120  | 57 -7   | 48% | 29 +1   | 24% | 20 +3   | 17% | 14 +3    | 12% |
| 150  | 71 -8   | 47% | 35      | 23% | 29 +6   | 19% | 15 +2    | 10% |

**$F_1$  score:** 0.46900 (79)  
**AUC(P):** 0.64130 (48)  
**AUC(S):** 0.58921 (23)

configuration: 400-entropy-2-d4

ranking function: **scaled** 0.27675 +0.05614

| size | N [601] |     | P [131] |     | S [210] |     | P+S [59] |     |
|------|---------|-----|---------|-----|---------|-----|----------|-----|
|      | abs     | rel | abs     | rel | abs     | rel | abs      | rel |
| 10   | 3 -1    | 30% | 4 -2    | 40% | 1 +1    | 10% | 2 +2     | 20% |
| 30   | 16 +1   | 53% | 7 -2    | 23% | 2       | 7%  | 5 +1     | 17% |
| 60   | 25 -4   | 42% | 18 +2   | 30% | 9 +1    | 15% | 8 +1     | 13% |
| 90   | 43 -3   | 48% | 23 +2   | 26% | 12 -1   | 13% | 12 +2    | 13% |
| 120  | 53 -11  | 44% | 30 +2   | 25% | 23 +6   | 19% | 14 +3    | 12% |
| 150  | 75 -4   | 50% | 33 -2   | 22% | 27 +4   | 18% | 15 +2    | 10% |

**$F_1$  score:** 0.46700 (84)  
**AUC(P):** 0.64518 (42)  
**AUC(S):** 0.59520 (18)

configuration: 100-entropy-2-d4

ranking function: **zscore** 0.29147 +0.09761

| size | N [601] |     | P [131] |     | S [210] |     | P+S [59] |     |
|------|---------|-----|---------|-----|---------|-----|----------|-----|
|      | abs     | rel | abs     | rel | abs     | rel | abs      | rel |
| 10   | 3 -2    | 30% | 4 -1    | 40% | 1 +1    | 10% | 2 +2     | 20% |
| 30   | 13 -2   | 43% | 9       | 30% | 3 +1    | 10% | 5 +1     | 17% |
| 60   | 26 -2   | 43% | 17      | 28% | 10 +1   | 17% | 7 +1     | 12% |
| 90   | 38 -10  | 42% | 23 +3   | 26% | 17 +4   | 19% | 12 +3    | 13% |
| 120  | 53 -12  | 44% | 28 +4   | 23% | 25 +6   | 21% | 14 +2    | 12% |
| 150  | 73 -7   | 49% | 33 +1   | 22% | 28 +3   | 19% | 16 +3    | 11% |

**$F_1$  score:** 0.46750 (82)  
**AUC(P):** 0.64346 (45)  
**AUC(S):** 0.59745 (16)

configuration: 100-gini-2-d4

ranking function: **zscore** 0.29239 +0.07340

| size | N [601] |     | P [131] |     | S [210] |     | P+S [59] |     |
|------|---------|-----|---------|-----|---------|-----|----------|-----|
|      | abs     | rel | abs     | rel | abs     | rel | abs      | rel |
| 10   | 3 -2    | 30% | 4 -1    | 40% | 1 +1    | 10% | 2 +2     | 20% |
| 30   | 13 -2   | 43% | 9       | 30% | 3 +1    | 10% | 5 +1     | 17% |
| 60   | 26 -2   | 43% | 17      | 28% | 10 +1   | 17% | 7 +1     | 12% |
| 90   | 38 -10  | 42% | 23 +3   | 26% | 17 +4   | 19% | 12 +3    | 13% |
| 120  | 53 -12  | 44% | 28 +4   | 23% | 25 +6   | 21% | 14 +2    | 12% |
| 150  | 73 -7   | 49% | 33 +1   | 22% | 28 +3   | 19% | 16 +3    | 11% |

**$F_1$  score:** 0.46750 (82)  
**AUC(P):** 0.64346 (45)  
**AUC(S):** 0.59745 (16)

configuration: 100-gini-2-d4

(a) progressive weights

(b) split weights

**eTable 11:** Results of simulated recruitment for the **DIGICOD selection model (2 years shift)** configurations with best recruitment score (given at the top of each table). The differences in recruitment compared to the model configuration with highest  $F_1$  score are highlighted with green (positive) and red (negative) colour. For each of the ranking functions the used model configuration and its prediction quality measured with  $F_1$  score and AUC is given for reference (rank of the measure among all configurations is given in brackets).

| $F_1$ score   | configuration    | AUC(P)         | configuration     | AUC(S)         | configuration     |
|---------------|------------------|----------------|-------------------|----------------|-------------------|
| <b>0.635</b>  | 400-entropy-2-d9 | <b>0.75403</b> | 600-entropy-2-d6  | <b>0.4697</b>  | 800-entropy-2-d10 |
| <b>0.635</b>  | 800-gini-2-d9    | <b>0.74839</b> | 200-entropy-2-d6  | <b>0.46506</b> | 600-gini-2-d10    |
| <b>0.635</b>  | 1000-gini-2-d8   | <b>0.72026</b> | 1000-entropy-2-d6 | <b>0.44963</b> | 100-entropy-2-d5  |
| ...           |                  | ...            |                   | ...            |                   |
| <b>0.592</b>  | 200-entropy-2-d4 | <b>0.60554</b> | 100-gini-2-d10    | <b>0.29548</b> | 1000-entropy-2-d4 |
| <b>0.59</b>   | 100-gini-2-d4    | <b>0.59794</b> | 600-gini-2-d4     | <b>0.29349</b> | 400-gini-2-d5     |
| <b>0.5875</b> | 100-entropy-2-d4 | <b>0.59259</b> | 600-gini-2-d10    | <b>0.27736</b> | 400-entropy-2-d6  |

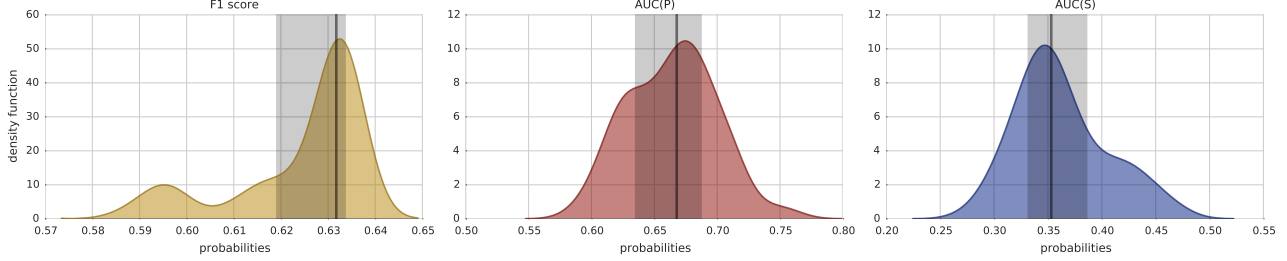

**eFigure 11:** Distribution of quality measures across all **DIGICOD selection model (3 years shift)** configurations. The grey area shows interquartile range and thick vertical line indicates the median value. Tables show 3 top/bottom scores and corresponding model parameters.

ranking function: **sum** 0.11305 +0.09372

| size | N [695] |     | P [115] |     | S [109] |     | P+S [24] |     |
|------|---------|-----|---------|-----|---------|-----|----------|-----|
|      | abs     | rel | abs     | rel | abs     | rel | abs      | rel |
| 10   | 5       | 50% | 5       | 50% | 0       | 0%  | 0        | 0%  |
| 30   | 15 -4   | 50% | 11 +2   | 37% | 3 +2    | 10% | 1        | 3%  |
| 60   | 33 -10  | 55% | 20 +9   | 33% | 5 +1    | 8%  | 2        | 3%  |
| 90   | 54 -10  | 60% | 26 +11  | 29% | 7       | 8%  | 3 -1     | 3%  |
| 120  | 71 -16  | 59% | 32 +13  | 27% | 14 +4   | 12% | 3 -1     | 2%  |
| 150  | 93 -19  | 62% | 37 +16  | 25% | 17 +4   | 11% | 3 -1     | 2%  |

**configuration:** 200-gini-2-d4

**$F_1$  score:** 0.59600 (77)  
**AUC(P):** 0.67962 (28)  
**AUC(S):** 0.35275 (43)

ranking function: **sum** 0.13653 +0.02929

| size | N [695] |     | P [115] |     | S [109] |     | P+S [24] |     |
|------|---------|-----|---------|-----|---------|-----|----------|-----|
|      | abs     | rel | abs     | rel | abs     | rel | abs      | rel |
| 10   | 5       | 50% | 5       | 50% | 0       | 0%  | 0        | 0%  |
| 30   | 16 -3   | 53% | 9       | 30% | 4 +3    | 13% | 1        | 3%  |
| 60   | 38 -5   | 63% | 11      | 18% | 9 +5    | 15% | 2        | 3%  |
| 90   | 60 -4   | 67% | 18 +3   | 20% | 10 +3   | 11% | 2 -2     | 2%  |
| 120  | 83 -4   | 69% | 23 +4   | 19% | 12 +2   | 10% | 2 -2     | 2%  |
| 150  | 102 -10 | 68% | 27 +6   | 18% | 17 +4   | 11% | 4        | 3%  |

**configuration:** 100-gini-2-d6

**$F_1$  score:** 0.62450 (59)  
**AUC(P):** 0.69898 (13)  
**AUC(S):** 0.39538 (18)

ranking function: **scaled** 0.09109 +0.09426

| size | N [695] |     | P [115] |     | S [109] |     | P+S [24] |     |
|------|---------|-----|---------|-----|---------|-----|----------|-----|
|      | abs     | rel | abs     | rel | abs     | rel | abs      | rel |
| 10   | 6       | 60% | 4       | 40% | 0       | 0%  | 0        | 0%  |
| 30   | 16 -5   | 53% | 10 +2   | 33% | 3 +2    | 10% | 1 +1     | 3%  |
| 60   | 34 -9   | 57% | 20 +9   | 33% | 5 +1    | 8%  | 1 -1     | 2%  |
| 90   | 54 -11  | 60% | 24 +10  | 27% | 9 +2    | 10% | 3 -1     | 3%  |
| 120  | 74 -14  | 62% | 30 +11  | 25% | 13 +4   | 11% | 3 -1     | 2%  |
| 150  | 97 -15  | 65% | 35 +15  | 23% | 15 +1   | 10% | 3 -1     | 2%  |

**configuration:** 200-gini-2-d4

**$F_1$  score:** 0.59600 (77)  
**AUC(P):** 0.67962 (28)  
**AUC(S):** 0.35275 (43)

ranking function: **scaled** 0.12788 +0.02951

| size | N [695] |     | P [115] |     | S [109] |     | P+S [24] |     |
|------|---------|-----|---------|-----|---------|-----|----------|-----|
|      | abs     | rel | abs     | rel | abs     | rel | abs      | rel |
| 10   | 6       | 60% | 4       | 40% | 0       | 0%  | 0        | 0%  |
| 30   | 16 -5   | 53% | 10 +2   | 33% | 3 +2    | 10% | 1 +1     | 3%  |
| 60   | 34 -9   | 57% | 20 +9   | 33% | 5 +1    | 8%  | 1 -1     | 2%  |
| 90   | 54 -11  | 60% | 24 +10  | 27% | 9 +2    | 10% | 3 -1     | 3%  |
| 120  | 74 -14  | 62% | 30 +11  | 25% | 13 +4   | 11% | 3 -1     | 2%  |
| 150  | 97 -15  | 65% | 35 +15  | 23% | 15 +1   | 10% | 3 -1     | 2%  |

**configuration:** 200-gini-2-d4

**$F_1$  score:** 0.59600 (77)  
**AUC(P):** 0.67962 (28)  
**AUC(S):** 0.35275 (43)

ranking function: **zscore** 0.05304 +0.05882

| size | N [695] |     | P [115] |     | S [109] |     | P+S [24] |     |
|------|---------|-----|---------|-----|---------|-----|----------|-----|
|      | abs     | rel | abs     | rel | abs     | rel | abs      | rel |
| 10   | 7 +1    | 70% | 3 -1    | 30% | 0       | 0%  | 0        | 0%  |
| 30   | 19 -1   | 63% | 9 +1    | 30% | 1 -1    | 3%  | 1 +1     | 3%  |
| 60   | 34 -10  | 57% | 20 +8   | 33% | 5 +2    | 8%  | 1        | 2%  |
| 90   | 57 -8   | 63% | 23 +8   | 26% | 9 +3    | 10% | 1 -3     | 1%  |
| 120  | 79 -10  | 66% | 27 +10  | 22% | 13 +3   | 11% | 1 -3     | 1%  |
| 150  | 97 -17  | 65% | 34 +15  | 23% | 16 +3   | 11% | 3 -1     | 2%  |

**configuration:** 200-gini-2-d4

**$F_1$  score:** 0.59600 (77)  
**AUC(P):** 0.67962 (28)  
**AUC(S):** 0.35275 (43)

ranking function: **zscore** 0.11869 +0.02362

| size | N [695] |     | P [115] |     | S [109] |     | P+S [24] |     |
|------|---------|-----|---------|-----|---------|-----|----------|-----|
|      | abs     | rel | abs     | rel | abs     | rel | abs      | rel |
| 10   | 5 -1    | 50% | 4       | 40% | 1 +1    | 10% | 0        | 0%  |
| 30   | 19 -1   | 63% | 7 -1    | 23% | 4 +2    | 13% | 0        | 0%  |
| 60   | 43 -1   | 72% | 11 -1   | 18% | 6 +3    | 10% | 0 -1     | 0%  |
| 90   | 64 -1   | 71% | 15      | 17% | 9 +3    | 10% | 2 -2     | 2%  |
| 120  | 84 -5   | 70% | 20 +3   | 17% | 12 +2   | 10% | 4        | 3%  |
| 150  | 106 -8  | 71% | 25 +6   | 17% | 14 +1   | 9%  | 5 +1     | 3%  |

**configuration:** 100-entropy-2-d8

**$F_1$  score:** 0.63200 (40)  
**AUC(P):** 0.66417 (44)  
**AUC(S):** 0.44677 (4)

(a) progressive weights

(b) split weights

**eTable 12:** Results of simulated recruitment for the **DIGICOD selection model (3 years shift)** configurations with best recruitment score (given at the top of each table). The differences in recruitment compared to the model configuration with highest  $F_1$  score are highlighted with green (positive) and red (negative) colour. For each of the ranking functions the used model configuration and its prediction quality measured with  $F_1$  score and AUC is given for reference (rank of the measure among all configurations is given in brackets).

| $F_1$ score   | configuration    |
|---------------|------------------|
| <b>0.534</b>  | 1000-gini-2-d9   |
| <b>0.534</b>  | 800-gini-2-d9    |
| <b>0.5335</b> | 600-gini-2-d9    |
| ...           |                  |
| <b>0.458</b>  | 200-entropy-2-d4 |
| <b>0.458</b>  | 400-entropy-2-d4 |
| <b>0.4555</b> | 100-entropy-2-d4 |

| AUC(P)         | configuration     |
|----------------|-------------------|
| <b>0.71063</b> | 100-entropy-2-d8  |
| <b>0.69878</b> | 200-entropy-2-d10 |
| <b>0.66968</b> | 1000-gini-2-d10   |
| ...            |                   |
| <b>0.59698</b> | 800-gini-2-d4     |
| <b>0.59521</b> | 1000-gini-2-d8    |
| <b>0.56287</b> | 100-gini-2-d7     |

| AUC(S)         | configuration     |
|----------------|-------------------|
| <b>0.65308</b> | 200-entropy-2-d8  |
| <b>0.64805</b> | 200-gini-2-d5     |
| <b>0.64666</b> | 200-entropy-2-d5  |
| ...            |                   |
| <b>0.54374</b> | 100-gini-2-d6     |
| <b>0.52782</b> | 1000-entropy-2-d8 |
| <b>0.52771</b> | 100-entropy-2-d6  |

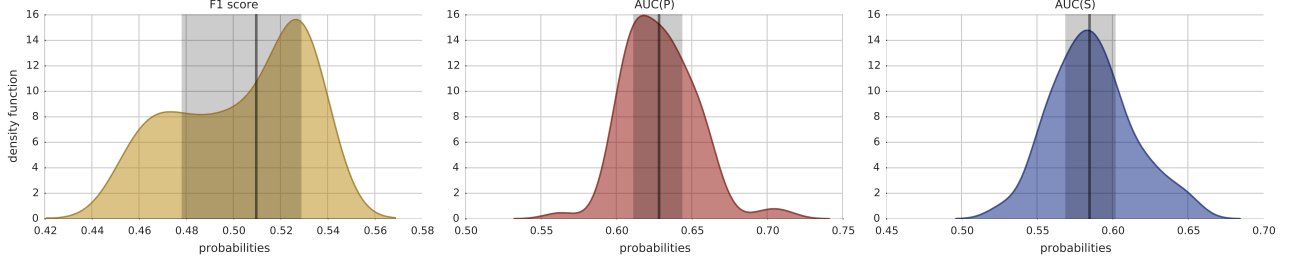

**Figure 12:** Distribution of quality measures across all **HOSTAS selection model (no shift)** configurations. The grey area shows interquartile range and thick vertical line indicates the median value. Tables show 3 top/bottom scores and corresponding model parameters.

| ranking function: <b>sum</b> |        | 0.42769 <sup>+0.13967</sup>                 |        |         |       |         |       |           |  |
|------------------------------|--------|---------------------------------------------|--------|---------|-------|---------|-------|-----------|--|
|                              |        | N [1733]                                    |        | P [358] |       | S [591] |       | P+S [160] |  |
| size                         | abs    | rel                                         | abs    | rel     | abs   | rel     | abs   | rel       |  |
| 10                           | 1 -3   | 10%                                         | 6      | 60%     | 1 +1  | 10%     | 2 +2  | 20%       |  |
| 30                           | 6 -6   | 20%                                         | 18 +5  | 60%     | 1 -1  | 3%      | 5 +2  | 17%       |  |
| 60                           | 14 -6  | 23%                                         | 31 +3  | 52%     | 4 -3  | 7%      | 11 +6 | 18%       |  |
| 90                           | 22 -12 | 24%                                         | 43 +4  | 48%     | 9     | 10%     | 16 +8 | 18%       |  |
| 120                          | 37 -10 | 31%                                         | 52 +8  | 43%     | 10 -3 | 8%      | 21 +5 | 18%       |  |
| 150                          | 53 -5  | 35%                                         | 59 +11 | 39%     | 11 -6 | 7%      | 27    | 18%       |  |
| <b>configuration:</b>        |        | <b><math>F_1</math> score:</b> 0.45800 (83) |        |         |       |         |       |           |  |
| 400-entropy-2-d4             |        | <b>AUC(P):</b> 0.62820 (43)                 |        |         |       |         |       |           |  |
|                              |        | <b>AUC(S):</b> 0.56992 (62)                 |        |         |       |         |       |           |  |

| ranking function: <b>sum</b> |        | 0.31392 <sup>+0.09032</sup>                 |        |         |       |         |       |           |  |
|------------------------------|--------|---------------------------------------------|--------|---------|-------|---------|-------|-----------|--|
|                              |        | N [1733]                                    |        | P [358] |       | S [591] |       | P+S [160] |  |
| size                         | abs    | rel                                         | abs    | rel     | abs   | rel     | abs   | rel       |  |
| 10                           | 2 -2   | 20%                                         | 6      | 60%     | 1 +1  | 10%     | 1 +1  | 10%       |  |
| 30                           | 6 -6   | 20%                                         | 16 +3  | 53%     | 1 -1  | 3%      | 7 +4  | 23%       |  |
| 60                           | 17 -3  | 28%                                         | 25 -3  | 42%     | 4 -3  | 7%      | 14 +9 | 23%       |  |
| 90                           | 22 -12 | 24%                                         | 44 +5  | 49%     | 9     | 10%     | 15 +7 | 17%       |  |
| 120                          | 35 -12 | 29%                                         | 52 +8  | 43%     | 13    | 11%     | 20 +4 | 17%       |  |
| 150                          | 48 -10 | 32%                                         | 59 +11 | 39%     | 16 -1 | 11%     | 27    | 18%       |  |
| <b>configuration:</b>        |        | <b><math>F_1</math> score:</b> 0.45950 (78) |        |         |       |         |       |           |  |
| 100-gini-2-d4                |        | <b>AUC(P):</b> 0.60619 (73)                 |        |         |       |         |       |           |  |
|                              |        | <b>AUC(S):</b> 0.60128 (23)                 |        |         |       |         |       |           |  |

| ranking function: <b>scaled</b> |        | 0.40155 <sup>+0.16160</sup>                 |        |         |       |         |       |           |  |
|---------------------------------|--------|---------------------------------------------|--------|---------|-------|---------|-------|-----------|--|
|                                 |        | N [1733]                                    |        | P [358] |       | S [591] |       | P+S [160] |  |
| size                            | abs    | rel                                         | abs    | rel     | abs   | rel     | abs   | rel       |  |
| 10                              | 2 -4   | 20%                                         | 6 +2   | 60%     | 1 +1  | 10%     | 1 +1  | 10%       |  |
| 30                              | 8 -6   | 27%                                         | 15 +5  | 50%     | 2     | 7%      | 5 +1  | 17%       |  |
| 60                              | 16 -10 | 27%                                         | 26 +5  | 43%     | 5 -3  | 8%      | 13 +8 | 22%       |  |
| 90                              | 25 -14 | 28%                                         | 41 +9  | 46%     | 6 -4  | 7%      | 18 +9 | 20%       |  |
| 120                             | 38 -10 | 32%                                         | 49 +8  | 41%     | 11 -6 | 9%      | 22 +8 | 18%       |  |
| 150                             | 52 -7  | 35%                                         | 58 +11 | 39%     | 15 -8 | 10%     | 25 +4 | 17%       |  |
| <b>configuration:</b>           |        | <b><math>F_1</math> score:</b> 0.45850 (81) |        |         |       |         |       |           |  |
| 600-entropy-2-d4                |        | <b>AUC(P):</b> 0.62516 (46)                 |        |         |       |         |       |           |  |
|                                 |        | <b>AUC(S):</b> 0.62772 (8)                  |        |         |       |         |       |           |  |

| ranking function: <b>scaled</b> |        | 0.31180 <sup>+0.08828</sup>                 |        |         |       |         |       |           |  |
|---------------------------------|--------|---------------------------------------------|--------|---------|-------|---------|-------|-----------|--|
|                                 |        | N [1733]                                    |        | P [358] |       | S [591] |       | P+S [160] |  |
| size                            | abs    | rel                                         | abs    | rel     | abs   | rel     | abs   | rel       |  |
| 10                              | 3 -3   | 30%                                         | 5 +1   | 50%     | 1 +1  | 10%     | 1 +1  | 10%       |  |
| 30                              | 8 -6   | 27%                                         | 13 +3  | 43%     | 3 +1  | 10%     | 6 +2  | 20%       |  |
| 60                              | 16 -10 | 27%                                         | 27 +6  | 45%     | 5 -3  | 8%      | 12 +7 | 20%       |  |
| 90                              | 29 -10 | 32%                                         | 36 +4  | 40%     | 7 -3  | 8%      | 18 +9 | 20%       |  |
| 120                             | 37 -11 | 31%                                         | 47 +6  | 39%     | 13 -4 | 11%     | 23 +9 | 19%       |  |
| 150                             | 50 -9  | 33%                                         | 58 +11 | 39%     | 17 -6 | 11%     | 25 +4 | 17%       |  |
| <b>configuration:</b>           |        | <b><math>F_1</math> score:</b> 0.45950 (78) |        |         |       |         |       |           |  |
| 100-gini-2-d4                   |        | <b>AUC(P):</b> 0.60619 (73)                 |        |         |       |         |       |           |  |
|                                 |        | <b>AUC(S):</b> 0.60128 (23)                 |        |         |       |         |       |           |  |

| ranking function: <b>zscore</b> |       | 0.30406 <sup>+0.06586</sup>                 |       |         |       |         |       |           |  |
|---------------------------------|-------|---------------------------------------------|-------|---------|-------|---------|-------|-----------|--|
|                                 |       | N [1733]                                    |       | P [358] |       | S [591] |       | P+S [160] |  |
| size                            | abs   | rel                                         | abs   | rel     | abs   | rel     | abs   | rel       |  |
| 10                              | 4     | 40%                                         | 3     | 30%     | 2     | 20%     | 1     | 10%       |  |
| 30                              | 11 -5 | 37%                                         | 10 +3 | 33%     | 5 +1  | 17%     | 4 +1  | 13%       |  |
| 60                              | 21 -8 | 35%                                         | 21 +6 | 35%     | 11 +1 | 18%     | 7 +1  | 12%       |  |
| 90                              | 38 -6 | 42%                                         | 26 +2 | 29%     | 14    | 16%     | 12 +4 | 13%       |  |
| 120                             | 55    | 46%                                         | 31 +2 | 26%     | 17 -4 | 14%     | 17 +2 | 14%       |  |
| 150                             | 65    | 43%                                         | 42 +3 | 28%     | 22 -5 | 15%     | 21 +2 | 14%       |  |
| <b>configuration:</b>           |       | <b><math>F_1</math> score:</b> 0.47050 (72) |       |         |       |         |       |           |  |
| 100-entropy-2-d5                |       | <b>AUC(P):</b> 0.61668 (57)                 |       |         |       |         |       |           |  |
|                                 |       | <b>AUC(S):</b> 0.55021 (79)                 |       |         |       |         |       |           |  |

| ranking function: <b>zscore</b> |       | 0.29884 <sup>+0.03957</sup>                 |       |         |       |         |       |           |  |
|---------------------------------|-------|---------------------------------------------|-------|---------|-------|---------|-------|-----------|--|
|                                 |       | N [1733]                                    |       | P [358] |       | S [591] |       | P+S [160] |  |
| size                            | abs   | rel                                         | abs   | rel     | abs   | rel     | abs   | rel       |  |
| 10                              | 4     | 40%                                         | 3     | 30%     | 1 -1  | 10%     | 2 +1  | 20%       |  |
| 30                              | 13 -3 | 43%                                         | 6 -1  | 20%     | 4     | 13%     | 7 +4  | 23%       |  |
| 60                              | 29    | 48%                                         | 14 -1 | 23%     | 8 -2  | 13%     | 9 +3  | 15%       |  |
| 90                              | 42 -2 | 47%                                         | 21 -3 | 23%     | 16 +2 | 18%     | 11 +3 | 12%       |  |
| 120                             | 56 +1 | 47%                                         | 26 -3 | 22%     | 23 +2 | 19%     | 15    | 12%       |  |
| 150                             | 70 +5 | 47%                                         | 36 -3 | 24%     | 26 -1 | 17%     | 18 -1 | 12%       |  |
| <b>configuration:</b>           |       | <b><math>F_1</math> score:</b> 0.47200 (71) |       |         |       |         |       |           |  |
| 200-entropy-2-d5                |       | <b>AUC(P):</b> 0.60272 (78)                 |       |         |       |         |       |           |  |
|                                 |       | <b>AUC(S):</b> 0.64666 (3)                  |       |         |       |         |       |           |  |

(a) progressive weights

(b) split weights

**Table 13:** Results of simulated recruitment for the **HOSTAS selection model (no shift)** configurations with best recruitment score (given at the top of each table). The differences in recruitment compared to the model configuration with highest  $F_1$  score are highlighted with green (positive) and red (negative) colour. For each of the ranking functions the used model configuration and its prediction quality measured with  $F_1$  score and AUC is given for reference (rank of the measure among all configurations is given in brackets).

| $F_1$ score   | configuration    | AUC(P)         | configuration     | AUC(S)         | configuration    |
|---------------|------------------|----------------|-------------------|----------------|------------------|
| <b>0.5065</b> | 800-gini-2-d7    | <b>0.683</b>   | 400-entropy-2-d10 | <b>0.57127</b> | 200-gini-2-d9    |
| <b>0.5065</b> | 1000-gini-2-d7   | <b>0.6682</b>  | 600-gini-2-d10    | <b>0.55159</b> | 800-entropy-2-d9 |
| <b>0.5065</b> | 1000-gini-2-d6   | <b>0.6617</b>  | 200-entropy-2-d10 | <b>0.54481</b> | 800-gini-2-d10   |
| ...           |                  | ...            |                   | ...            |                  |
| <b>0.478</b>  | 200-entropy-2-d4 | <b>0.56448</b> | 200-gini-2-d9     | <b>0.40815</b> | 200-entropy-2-d4 |
| <b>0.4775</b> | 100-entropy-2-d4 | <b>0.5615</b>  | 200-entropy-2-d8  | <b>0.40785</b> | 200-gini-2-d4    |
| <b>0.4775</b> | 100-gini-2-d4    | <b>0.55471</b> | 100-gini-2-d4     | <b>0.37153</b> | 400-gini-2-d4    |

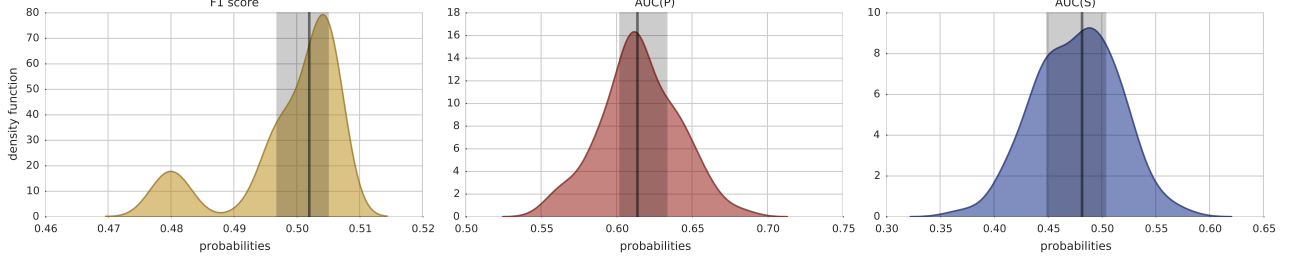

**eFigure 13:** Distribution of quality measures across all **HOSTAS** selection model (2 years shift) configurations. The grey area shows interquartile range and thick vertical line indicates the median value. Tables show 3 top/bottom scores and corresponding model parameters.

ranking function: **sum** 0.33606 +0.05119

| size | N [598] |     | P [131] |     | S [208] |     | P+S [59] |     |
|------|---------|-----|---------|-----|---------|-----|----------|-----|
|      | abs     | rel | abs     | rel | abs     | rel | abs      | rel |
| 10   | 1 -2    | 10% | 7 +1    | 70% | 1       | 10% | 1 +1     | 10% |
| 30   | 9 -2    | 30% | 13 +1   | 43% | 5 -1    | 17% | 3 +2     | 10% |
| 60   | 25 +2   | 42% | 19 -1   | 32% | 9 -3    | 15% | 7 +2     | 12% |
| 90   | 35 -5   | 39% | 30 +4   | 33% | 14      | 16% | 11 +1    | 12% |
| 120  | 46 -6   | 38% | 38 +4   | 32% | 20      | 17% | 16 +2    | 13% |
| 150  | 59 -6   | 39% | 47 +8   | 31% | 25 -2   | 17% | 19       | 13% |

**configuration:** 100-entropy-2-d4  **$F_1$  score:** 0.47750 (83)  
**AUC(P):** 0.64205 (12)  
**AUC(S):** 0.48170 (44)

ranking function: **sum** 0.28131 +0.02704

| size | N [598] |     | P [131] |     | S [208] |     | P+S [59] |     |
|------|---------|-----|---------|-----|---------|-----|----------|-----|
|      | abs     | rel | abs     | rel | abs     | rel | abs      | rel |
| 10   | 3       | 30% | 4 -2    | 40% | 1       | 10% | 2 +2     | 20% |
| 30   | 9 -2    | 30% | 12      | 40% | 6       | 20% | 3 +2     | 10% |
| 60   | 25 +2   | 42% | 18 -2   | 30% | 11 -1   | 18% | 6 +1     | 10% |
| 90   | 41 +1   | 46% | 26      | 29% | 14      | 16% | 9 -1     | 10% |
| 120  | 53 +1   | 44% | 33 -1   | 28% | 19 -1   | 16% | 15 +1    | 12% |
| 150  | 69 +4   | 46% | 36 -3   | 24% | 26 -1   | 17% | 19       | 13% |

**configuration:** 200-entropy-2-d10  **$F_1$  score:** 0.50050 (51)  
**AUC(P):** 0.66170 (3)  
**AUC(S):** 0.50763 (19)

ranking function: **scaled** 0.30863 +0.05184

| size | N [598] |     | P [131] |     | S [208] |     | P+S [59] |     |
|------|---------|-----|---------|-----|---------|-----|----------|-----|
|      | abs     | rel | abs     | rel | abs     | rel | abs      | rel |
| 10   | 2 -3    | 20% | 7 +3    | 70% | 0 -1    | 0%  | 1 +1     | 10% |
| 30   | 11      | 37% | 13 +1   | 43% | 4 -2    | 13% | 2 +1     | 7%  |
| 60   | 25      | 42% | 19      | 32% | 8 -5    | 13% | 8 +5     | 13% |
| 90   | 36 -4   | 40% | 28 +2   | 31% | 16 +2   | 18% | 10       | 11% |
| 120  | 46 -7   | 38% | 38 +5   | 32% | 23 +3   | 19% | 13 -1    | 11% |
| 150  | 62 -6   | 41% | 44 +7   | 29% | 26 -1   | 17% | 18       | 12% |

**configuration:** 100-entropy-2-d4  **$F_1$  score:** 0.47750 (83)  
**AUC(P):** 0.64205 (12)  
**AUC(S):** 0.48170 (44)

ranking function: **scaled** 0.27571 +0.03105

| size | N [598] |     | P [131] |     | S [208] |     | P+S [59] |     |
|------|---------|-----|---------|-----|---------|-----|----------|-----|
|      | abs     | rel | abs     | rel | abs     | rel | abs      | rel |
| 10   | 4 -1    | 40% | 3 -1    | 30% | 2 +1    | 20% | 1 +1     | 10% |
| 30   | 10 -1   | 33% | 13 +1   | 43% | 6       | 20% | 1        | 3%  |
| 60   | 20 -5   | 33% | 21 +2   | 35% | 15 +2   | 25% | 4 +1     | 7%  |
| 90   | 37 -3   | 41% | 25 -1   | 28% | 18 +4   | 20% | 10       | 11% |
| 120  | 56 +3   | 47% | 30 -3   | 25% | 21 +1   | 18% | 13 -1    | 11% |
| 150  | 74 +6   | 49% | 35 -2   | 23% | 26 -1   | 17% | 15 -3    | 10% |

**configuration:** 400-entropy-2-d10  **$F_1$  score:** 0.50100 (50)  
**AUC(P):** 0.68300 (1)  
**AUC(S):** 0.51902 (11)

ranking function: **zscore** 0.30153 +0.04397

| size | N [598] |     | P [131] |     | S [208] |     | P+S [59] |     |
|------|---------|-----|---------|-----|---------|-----|----------|-----|
|      | abs     | rel | abs     | rel | abs     | rel | abs      | rel |
| 10   | 2 -3    | 20% | 7 +3    | 70% | 1       | 10% | 0        | 0%  |
| 30   | 11      | 37% | 13 +2   | 43% | 4 -3    | 13% | 2 +1     | 7%  |
| 60   | 24      | 40% | 19 -2   | 32% | 12      | 20% | 5 +2     | 8%  |
| 90   | 37 -2   | 41% | 28 +2   | 31% | 14 -2   | 16% | 11 +2    | 12% |
| 120  | 48 -6   | 40% | 36 +3   | 30% | 22 +2   | 18% | 14 +1    | 12% |
| 150  | 63 -9   | 42% | 46 +11  | 31% | 26 +1   | 17% | 15 -3    | 10% |

**configuration:** 100-gini-2-d4  **$F_1$  score:** 0.47750 (84)  
**AUC(P):** 0.55471 (84)  
**AUC(S):** 0.49832 (26)

ranking function: **zscore** 0.27582 +0.03119

| size | N [598] |     | P [131] |     | S [208] |     | P+S [59] |     |
|------|---------|-----|---------|-----|---------|-----|----------|-----|
|      | abs     | rel | abs     | rel | abs     | rel | abs      | rel |
| 10   | 3 -2    | 30% | 4       | 40% | 1       | 10% | 2 +2     | 20% |
| 30   | 9 -2    | 30% | 12 +1   | 40% | 6 -1    | 20% | 3 +2     | 10% |
| 60   | 26 +2   | 43% | 17 -4   | 28% | 11 -1   | 18% | 6 +3     | 10% |
| 90   | 44 +5   | 49% | 24 -2   | 27% | 13 -3   | 14% | 9        | 10% |
| 120  | 57 +3   | 48% | 30 -3   | 25% | 20      | 17% | 13       | 11% |
| 150  | 72      | 48% | 32 -3   | 21% | 28 +3   | 19% | 18       | 12% |

**configuration:** 200-entropy-2-d10  **$F_1$  score:** 0.50050 (51)  
**AUC(P):** 0.66170 (3)  
**AUC(S):** 0.50763 (19)

(a) progressive weights

(b) split weights

**eTable 14:** Results of simulated recruitment for the **HOSTAS** selection model (2 years shift) configurations with best recruitment score (given at the top of each table). The differences in recruitment compared to the model configuration with highest  $F_1$  score are highlighted with green (positive) and red (negative) colour. For each of the ranking functions the used model configuration and its prediction quality measured with  $F_1$  score and AUC is given for reference (rank of the measure among all configurations is given in brackets).

| $F_1$ score   | configuration     |
|---------------|-------------------|
| <b>0.6425</b> | 800-entropy-2-d7  |
| <b>0.6425</b> | 1000-entropy-2-d7 |
| <b>0.6425</b> | 600-entropy-2-d8  |
| ...           |                   |
| <b>0.592</b>  | 800-entropy-2-d4  |
| <b>0.591</b>  | 600-entropy-2-d4  |
| <b>0.588</b>  | 100-entropy-2-d4  |

| AUC(P)         | configuration    |
|----------------|------------------|
| <b>0.71814</b> | 200-gini-2-d4    |
| <b>0.68033</b> | 400-gini-2-d5    |
| <b>0.6714</b>  | 400-entropy-2-d6 |
| ...            |                  |
| <b>0.58772</b> | 200-gini-2-d8    |
| <b>0.58379</b> | 100-entropy-2-d6 |
| <b>0.55908</b> | 200-entropy-2-d8 |

| AUC(S)         | configuration     |
|----------------|-------------------|
| <b>0.56884</b> | 100-entropy-2-d9  |
| <b>0.56165</b> | 1000-entropy-2-d4 |
| <b>0.54714</b> | 200-gini-2-d8     |
| ...            |                   |
| <b>0.39344</b> | 100-gini-2-d10    |
| <b>0.39319</b> | 400-gini-2-d10    |
| <b>0.37248</b> | 100-gini-2-d5     |

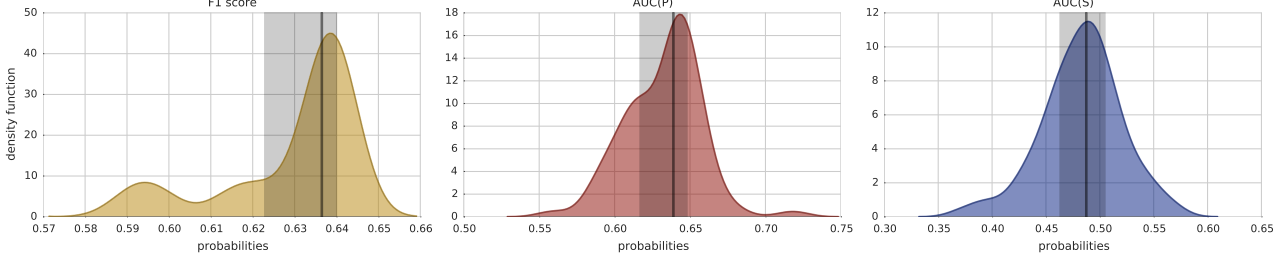

**Figure 14:** Distribution of quality measures across all **HOSTAS** selection model (3 years shift) configurations. The grey area shows interquartile range and thick vertical line indicates the median value. Tables show 3 top/bottom scores and corresponding model parameters.

ranking function: **sum** 0.19560 +0.07704

| size | N [694] |     | P [115] |     | S [109] |     | P+S [24] |     |
|------|---------|-----|---------|-----|---------|-----|----------|-----|
|      | abs     | rel | abs     | rel | abs     | rel | abs      | rel |
| 10   | 3 -1    | 30% | 6 +3    | 60% | 1 -1    | 10% | 0 -1     | 0%  |
| 30   | 15 -5   | 50% | 12 +6   | 40% | 1 -2    | 3%  | 2 +1     | 7%  |
| 60   | 28 -7   | 47% | 22 +6   | 37% | 6 -1    | 10% | 4 +2     | 7%  |
| 90   | 45 -6   | 50% | 27 +2   | 30% | 12      | 13% | 6 +4     | 7%  |
| 120  | 61 -11  | 51% | 36 +5   | 30% | 17 +4   | 14% | 6 +2     | 5%  |
| 150  | 82 -6   | 55% | 43 +4   | 29% | 19 +2   | 13% | 6        | 4%  |

configuration: 200-gini-2-d4  $F_1$  score: 0.59650 (77)  
AUC(P): 0.71814 (1)  
AUC(S): 0.44851 (72)

ranking function: **sum** 0.18507 +0.01962

| size | N [694] |     | P [115] |     | S [109] |     | P+S [24] |     |
|------|---------|-----|---------|-----|---------|-----|----------|-----|
|      | abs     | rel | abs     | rel | abs     | rel | abs      | rel |
| 10   | 4       | 40% | 3       | 30% | 2       | 20% | 1        | 10% |
| 30   | 15 -5   | 50% | 11 +5   | 37% | 3       | 10% | 1        | 3%  |
| 60   | 31 -4   | 52% | 20 +4   | 33% | 6 -1    | 10% | 3 +1     | 5%  |
| 90   | 47 -4   | 52% | 25      | 28% | 13 +1   | 14% | 5 +3     | 6%  |
| 120  | 68 -4   | 57% | 33 +2   | 28% | 14 +1   | 12% | 5 +1     | 4%  |
| 150  | 85 -3   | 57% | 41 +2   | 27% | 19 +2   | 13% | 5 -1     | 3%  |

configuration: 400-gini-2-d5  $F_1$  score: 0.62300 (62)  
AUC(P): 0.68033 (2)  
AUC(S): 0.48519 (44)

ranking function: **scaled** 0.18626 +0.06672

| size | N [694] |     | P [115] |     | S [109] |     | P+S [24] |     |
|------|---------|-----|---------|-----|---------|-----|----------|-----|
|      | abs     | rel | abs     | rel | abs     | rel | abs      | rel |
| 10   | 2 -2    | 20% | 7 +4    | 70% | 1 -1    | 10% | 0 -1     | 0%  |
| 30   | 13 -6   | 43% | 13 +6   | 43% | 3       | 10% | 1        | 3%  |
| 60   | 33 -1   | 55% | 18 +1   | 30% | 6 -2    | 10% | 3 +2     | 5%  |
| 90   | 46 -6   | 51% | 28 +3   | 31% | 12 +1   | 13% | 4 +2     | 4%  |
| 120  | 65 -7   | 54% | 34 +3   | 28% | 16 +2   | 13% | 5 +2     | 4%  |
| 150  | 83 -8   | 55% | 43 +6   | 29% | 18      | 12% | 6 +2     | 4%  |

configuration: 400-gini-2-d4  $F_1$  score: 0.59800 (75)  
AUC(P): 0.64773 (22)  
AUC(S): 0.50533 (21)

ranking function: **scaled** 0.18534 +0.02295

| size | N [694] |     | P [115] |     | S [109] |     | P+S [24] |     |
|------|---------|-----|---------|-----|---------|-----|----------|-----|
|      | abs     | rel | abs     | rel | abs     | rel | abs      | rel |
| 10   | 5 +1    | 50% | 3       | 30% | 1 -1    | 10% | 1        | 10% |
| 30   | 18 -1   | 60% | 6 -1    | 20% | 3       | 10% | 3 +2     | 10% |
| 60   | 34      | 57% | 14 -3   | 23% | 9 +1    | 15% | 3 +2     | 5%  |
| 90   | 52      | 58% | 21 -4   | 23% | 14 +3   | 16% | 3 +1     | 3%  |
| 120  | 67 -5   | 56% | 33 +2   | 28% | 15 +1   | 12% | 5 +2     | 4%  |
| 150  | 90 -1   | 60% | 35 -2   | 23% | 20 +2   | 13% | 5 +1     | 3%  |

configuration: 100-gini-2-d7  $F_1$  score: 0.64200 (4)  
AUC(P): 0.62220 (55)  
AUC(S): 0.51008 (18)

ranking function: **zscore** 0.16194 +0.07330

| size | N [694] |     | P [115] |     | S [109] |     | P+S [24] |     |
|------|---------|-----|---------|-----|---------|-----|----------|-----|
|      | abs     | rel | abs     | rel | abs     | rel | abs      | rel |
| 10   | 4 -1    | 40% | 4 +2    | 40% | 2       | 20% | 0 -1     | 0%  |
| 30   | 14 -6   | 47% | 11 +4   | 37% | 4 +2    | 13% | 1        | 3%  |
| 60   | 29 -8   | 48% | 20 +6   | 33% | 9 +1    | 15% | 2 +1     | 3%  |
| 90   | 50 -2   | 56% | 24      | 27% | 13      | 14% | 3 +2     | 3%  |
| 120  | 69 -6   | 58% | 32 +5   | 27% | 16      | 13% | 3 +1     | 2%  |
| 150  | 92 -8   | 61% | 37 +7   | 25% | 18 +1   | 12% | 3        | 2%  |

configuration: 600-gini-2-d4  $F_1$  score: 0.59750 (76)  
AUC(P): 0.64886 (21)  
AUC(S): 0.51809 (14)

ranking function: **zscore** 0.17900 +0.02526

| size | N [694] |     | P [115] |     | S [109] |     | P+S [24] |     |
|------|---------|-----|---------|-----|---------|-----|----------|-----|
|      | abs     | rel | abs     | rel | abs     | rel | abs      | rel |
| 10   | 5       | 50% | 3 +1    | 30% | 1 -1    | 10% | 1        | 10% |
| 30   | 14 -6   | 47% | 11 +4   | 37% | 4 +2    | 13% | 1        | 3%  |
| 60   | 30 -7   | 50% | 19 +5   | 32% | 9 +1    | 15% | 2 +1     | 3%  |
| 90   | 47 -5   | 52% | 27 +3   | 30% | 13      | 14% | 3 +2     | 3%  |
| 120  | 69 -6   | 58% | 31 +4   | 26% | 17 +1   | 14% | 3 +1     | 2%  |
| 150  | 92 -8   | 61% | 35 +5   | 23% | 19 +2   | 13% | 4 +1     | 3%  |

configuration: 600-entropy-2-d4  $F_1$  score: 0.59100 (83)  
AUC(P): 0.63906 (42)  
AUC(S): 0.54160 (5)

(a) progressive weights

(b) split weights

**Table 15:** Results of simulated recruitment for the **HOSTAS** selection model (3 years shift) configurations with best recruitment score (given at the top of each table). The differences in recruitment compared to the model configuration with highest  $F_1$  score are highlighted with green (positive) and red (negative) colour. For each of the ranking functions the used model configuration and its prediction quality measured with  $F_1$  score and AUC is given for reference (rank of the measure among all configurations is given in brackets).



| $F_1$ score   | configuration     |
|---------------|-------------------|
| <b>0.655</b>  | 800-entropy-2-d9  |
| <b>0.655</b>  | 600-entropy-2-d10 |
| <b>0.655</b>  | 800-entropy-2-d10 |
| ...           |                   |
| <b>0.584</b>  | 1000-entropy-2-d4 |
| <b>0.582</b>  | 200-entropy-2-d4  |
| <b>0.5765</b> | 100-entropy-2-d4  |

| AUC(P)         | configuration     |
|----------------|-------------------|
| <b>0.74372</b> | 200-entropy-2-d9  |
| <b>0.73141</b> | 1000-entropy-2-d5 |
| <b>0.73035</b> | 800-entropy-2-d7  |
| ...            |                   |
| <b>0.6127</b>  | 800-gini-2-d6     |
| <b>0.60945</b> | 200-gini-2-d6     |
| <b>0.58808</b> | 100-entropy-2-d9  |

| AUC(S)         | configuration     |
|----------------|-------------------|
| <b>0.59901</b> | 400-gini-2-d7     |
| <b>0.57552</b> | 600-gini-2-d8     |
| <b>0.56576</b> | 200-gini-2-d4     |
| ...            |                   |
| <b>0.40368</b> | 200-gini-2-d7     |
| <b>0.39942</b> | 800-entropy-2-d10 |
| <b>0.36552</b> | 100-entropy-2-d9  |

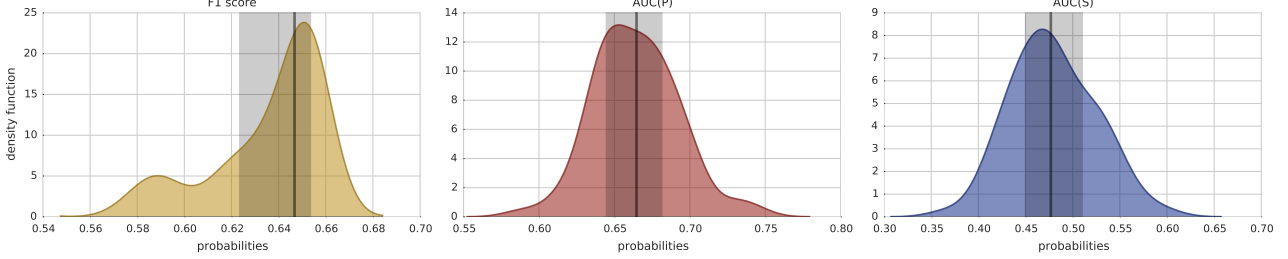

**Figure 15:** Distribution of quality measures across all **HOSTAS** selection model (5 years shift) configurations. The grey area shows interquartile range and thick vertical line indicates the median value. Tables show 3 top/bottom scores and corresponding model parameters.

ranking function: **sum** 0.06818 +0.10810

| size | N [746] |     | P [114] |     | S [109] |     | P+S [24] |     |
|------|---------|-----|---------|-----|---------|-----|----------|-----|
|      | abs     | rel | abs     | rel | abs     | rel | abs      | rel |
| 10   | 5 -1    | 50% | 4       | 40% | 1 +1    | 10% | 0        | 0%  |
| 30   | 17 -6   | 57% | 10 +3   | 33% | 3 +3    | 10% | 0        | 0%  |
| 60   | 40 -5   | 67% | 16 +3   | 27% | 3 +1    | 5%  | 1 +1     | 2%  |
| 90   | 56 -14  | 62% | 25 +9   | 28% | 4 +1    | 4%  | 5 +4     | 6%  |
| 120  | 77 -13  | 64% | 31 +10  | 26% | 5 -1    | 4%  | 7 +4     | 6%  |
| 150  | 99 -7   | 66% | 37 +10  | 25% | 7 -5    | 5%  | 7 +4     | 5%  |

**configuration:** 600-gini-2-d4  
 **$F_1$  score:** 0.59400 (76)  
**AUC(P):** 0.69614 (10)  
**AUC(S):** 0.54806 (5)

ranking function: **sum** 0.12160 +0.05692

| size | N [746] |     | P [114] |     | S [109] |     | P+S [24] |     |
|------|---------|-----|---------|-----|---------|-----|----------|-----|
|      | abs     | rel | abs     | rel | abs     | rel | abs      | rel |
| 10   | 5 -1    | 50% | 4       | 40% | 1 +1    | 10% | 0        | 0%  |
| 30   | 19 -4   | 63% | 8 +1    | 27% | 2 +2    | 7%  | 1 +1     | 3%  |
| 60   | 39 -6   | 65% | 17 +4   | 28% | 2       | 3%  | 2 +2     | 3%  |
| 90   | 56 -14  | 62% | 23 +7   | 26% | 6 +3    | 7%  | 5 +4     | 6%  |
| 120  | 78 -12  | 65% | 28 +7   | 23% | 8 +2    | 7%  | 6 +3     | 5%  |
| 150  | 100 -6  | 67% | 35 +8   | 23% | 9 -3    | 6%  | 6 +1     | 4%  |

**configuration:** 100-entropy-2-d4  
 **$F_1$  score:** 0.57650 (84)  
**AUC(P):** 0.62597 (79)  
**AUC(S):** 0.45562 (59)

ranking function: **scaled** 0.04772 +0.09849

| size | N [746] |     | P [114] |     | S [109] |     | P+S [24] |     |
|------|---------|-----|---------|-----|---------|-----|----------|-----|
|      | abs     | rel | abs     | rel | abs     | rel | abs      | rel |
| 10   | 5 -1    | 50% | 4       | 40% | 1 +1    | 10% | 0        | 0%  |
| 30   | 18 -4   | 60% | 9 +2    | 30% | 3 +2    | 10% | 0        | 0%  |
| 60   | 39 -8   | 65% | 16 +4   | 27% | 3 +2    | 5%  | 2 +2     | 3%  |
| 90   | 60 -10  | 67% | 23 +8   | 26% | 4       | 4%  | 3 +2     | 3%  |
| 120  | 84 -9   | 70% | 27 +10  | 22% | 5 -3    | 4%  | 4 +2     | 3%  |
| 150  | 102 -15 | 68% | 34 +13  | 23% | 7 -2    | 5%  | 7 +4     | 5%  |

**configuration:** 200-entropy-2-d4  
 **$F_1$  score:** 0.58200 (83)  
**AUC(P):** 0.63957 (71)  
**AUC(S):** 0.48456 (37)

ranking function: **scaled** 0.10946 +0.04649

| size | N [746] |     | P [114] |     | S [109] |     | P+S [24] |     |
|------|---------|-----|---------|-----|---------|-----|----------|-----|
|      | abs     | rel | abs     | rel | abs     | rel | abs      | rel |
| 10   | 8 +2    | 80% | 2 -2    | 20% | 0       | 0%  | 0        | 0%  |
| 30   | 20 -2   | 67% | 8 +1    | 27% | 1       | 3%  | 1 +1     | 3%  |
| 60   | 42 -5   | 70% | 12      | 20% | 4 +3    | 7%  | 2 +2     | 3%  |
| 90   | 63 -7   | 70% | 17 +2   | 19% | 5 +1    | 6%  | 5 +4     | 6%  |
| 120  | 80 -13  | 67% | 23 +6   | 19% | 10 +2   | 8%  | 7 +5     | 6%  |
| 150  | 105 -12 | 70% | 25 +4   | 17% | 13 +4   | 9%  | 7 +4     | 5%  |

**configuration:** 100-entropy-2-d6  
 **$F_1$  score:** 0.63100 (60)  
**AUC(P):** 0.62474 (81)  
**AUC(S):** 0.46465 (50)

ranking function: **zscore** -0.00040 +0.05108

| size | N [746] |     | P [114] |     | S [109] |     | P+S [24] |     |
|------|---------|-----|---------|-----|---------|-----|----------|-----|
|      | abs     | rel | abs     | rel | abs     | rel | abs      | rel |
| 10   | 6       | 60% | 4       | 40% | 0       | 0%  | 0        | 0%  |
| 30   | 21 -2   | 70% | 8 +2    | 27% | 1       | 3%  | 0        | 0%  |
| 60   | 42 -3   | 70% | 12 -1   | 20% | 5 +3    | 8%  | 1 +1     | 2%  |
| 90   | 64 -7   | 71% | 18 +4   | 20% | 6 +2    | 7%  | 2 +1     | 2%  |
| 120  | 86 -8   | 72% | 23 +6   | 19% | 8       | 7%  | 3 +2     | 2%  |
| 150  | 108 -8  | 72% | 29 +7   | 19% | 10 +1   | 7%  | 3        | 2%  |

**configuration:** 200-entropy-2-d4  
 **$F_1$  score:** 0.58200 (83)  
**AUC(P):** 0.63957 (71)  
**AUC(S):** 0.48456 (37)

ranking function: **zscore** 0.10307 +0.03935

| size | N [746] |     | P [114] |     | S [109] |     | P+S [24] |     |
|------|---------|-----|---------|-----|---------|-----|----------|-----|
|      | abs     | rel | abs     | rel | abs     | rel | abs      | rel |
| 10   | 8 +2    | 80% | 2 -2    | 20% | 0       | 0%  | 0        | 0%  |
| 30   | 22 -1   | 73% | 6       | 20% | 1       | 3%  | 1 +1     | 3%  |
| 60   | 42 -3   | 70% | 11 -2   | 18% | 5 +3    | 8%  | 2 +2     | 3%  |
| 90   | 63 -8   | 70% | 16 +2   | 18% | 8 +4    | 9%  | 3 +2     | 3%  |
| 120  | 85 -9   | 71% | 22 +5   | 18% | 10 +2   | 8%  | 3 +2     | 2%  |
| 150  | 106 -10 | 71% | 26 +4   | 17% | 12 +3   | 8%  | 6 +3     | 4%  |

**configuration:** 100-entropy-2-d6  
 **$F_1$  score:** 0.63100 (60)  
**AUC(P):** 0.62474 (81)  
**AUC(S):** 0.46465 (50)

(a) progressive weights

(b) split weights

**Table 16:** Results of simulated recruitment for the **HOSTAS** selection model (5 years shift) configurations with best recruitment score (given at the top of each table). The differences in recruitment compared to the model configuration with highest  $F_1$  score are highlighted with green (positive) and red (negative) colour. For each of the ranking functions the used model configuration and its prediction quality measured with  $F_1$  score and AUC is given for reference (rank of the measure among all configurations is given in brackets).

| $F_1$ score   | configuration     |
|---------------|-------------------|
| <b>0.661</b>  | 600-entropy-2-d9  |
| <b>0.661</b>  | 800-entropy-2-d9  |
| <b>0.661</b>  | 800-entropy-2-d10 |
| ...           |                   |
| <b>0.621</b>  | 600-entropy-2-d4  |
| <b>0.6205</b> | 200-entropy-2-d4  |
| <b>0.617</b>  | 100-entropy-2-d4  |

| AUC(P)         | configuration     |
|----------------|-------------------|
| <b>0.76807</b> | 1000-entropy-2-d8 |
| <b>0.75185</b> | 600-gini-2-d9     |
| <b>0.75038</b> | 600-entropy-2-d8  |
| ...            |                   |
| <b>0.65255</b> | 800-gini-2-d4     |
| <b>0.64235</b> | 600-gini-2-d4     |
| <b>0.63654</b> | 100-gini-2-d4     |

| AUC(S)         | configuration    |
|----------------|------------------|
| <b>0.54707</b> | 200-entropy-2-d4 |
| <b>0.5064</b>  | 400-gini-2-d5    |
| <b>0.50515</b> | 600-gini-2-d5    |
| ...            |                  |
| <b>0.40769</b> | 100-gini-2-d10   |
| <b>0.34551</b> | 100-entropy-2-d9 |
| <b>0.3428</b>  | 400-gini-2-d10   |

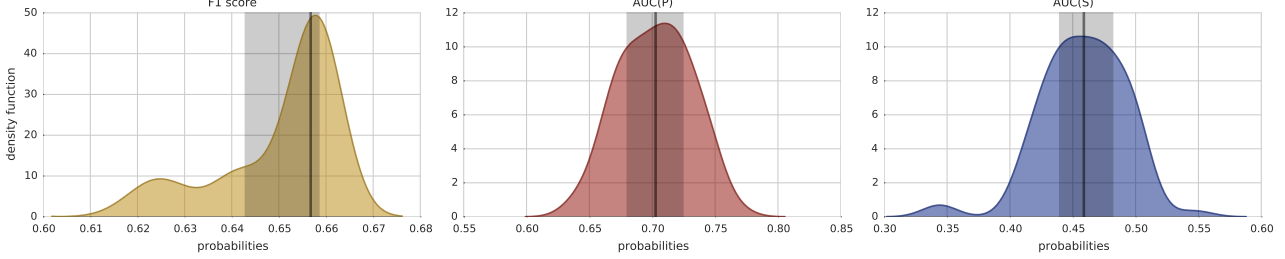

**Figure 16:** Distribution of quality measures across all **MUST selection model (3 years shift)** configurations. The grey area shows interquartile range and thick vertical line indicates the median value. Tables show 3 top/bottom scores and corresponding model parameters.

ranking function: **sum** 0.21637 +0.04482

| size | N [685] |     | P [112] |     | S [109] |     | P+S [24] |     |
|------|---------|-----|---------|-----|---------|-----|----------|-----|
|      | abs     | rel | abs     | rel | abs     | rel | abs      | rel |
| 10   | 2 -2    | 20% | 6 +1    | 60% | 1       | 10% | 1 +1     | 10% |
| 30   | 14      | 47% | 13 +1   | 43% | 2       | 7%  | 1 -1     | 3%  |
| 60   | 27 -4   | 45% | 22 +1   | 37% | 7 +2    | 12% | 4 +1     | 7%  |
| 90   | 42 -3   | 47% | 35 +1   | 39% | 9 +2    | 10% | 4        | 4%  |
| 120  | 63 +1   | 52% | 40 -1   | 33% | 11      | 9%  | 6        | 5%  |
| 150  | 76 -7   | 51% | 51 +4   | 34% | 15 +1   | 10% | 8 +2     | 5%  |

configuration: 200-gini-2-d9  $F_1$  score: 0.65800 (32)  
AUC(P): 0.69630 (50)  
AUC(S): 0.42949 (70)

ranking function: **sum** 0.19522 +0.03691

| size | N [685] |     | P [112] |     | S [109] |     | P+S [24] |     |
|------|---------|-----|---------|-----|---------|-----|----------|-----|
|      | abs     | rel | abs     | rel | abs     | rel | abs      | rel |
| 10   | 3 -1    | 30% | 4 -1    | 40% | 1       | 10% | 2 +2     | 20% |
| 30   | 13 -1   | 43% | 11 -1   | 37% | 3 +1    | 10% | 3 +1     | 10% |
| 60   | 29 -2   | 48% | 21      | 35% | 6 +1    | 10% | 4 +1     | 7%  |
| 90   | 46 +1   | 51% | 32 -2   | 36% | 7       | 8%  | 5 +1     | 6%  |
| 120  | 63 +1   | 52% | 43 +2   | 36% | 8 -3    | 7%  | 6        | 5%  |
| 150  | 78 -5   | 52% | 49 +2   | 33% | 16 +2   | 11% | 7 +1     | 5%  |

configuration: 200-entropy-2-d10  $F_1$  score: 0.65950 (14)  
AUC(P): 0.73027 (14)  
AUC(S): 0.43250 (66)

ranking function: **scaled** 0.19582 +0.06123

| size | N [685] |     | P [112] |     | S [109] |     | P+S [24] |     |
|------|---------|-----|---------|-----|---------|-----|----------|-----|
|      | abs     | rel | abs     | rel | abs     | rel | abs      | rel |
| 10   | 4       | 40% | 5       | 50% | 1       | 10% | 0        | 0%  |
| 30   | 11 -7   | 37% | 15 +7   | 50% | 4 +1    | 13% | 0 -1     | 0%  |
| 60   | 27 -5   | 45% | 24 +3   | 40% | 7 +2    | 12% | 2        | 3%  |
| 90   | 46 -3   | 51% | 30 -2   | 33% | 11 +4   | 12% | 3 +1     | 3%  |
| 120  | 62 -2   | 52% | 40      | 33% | 12 -1   | 10% | 6 +3     | 5%  |
| 150  | 78 -7   | 52% | 49 +6   | 33% | 15 -2   | 10% | 8 +3     | 5%  |

configuration: 400-gini-2-d4  $F_1$  score: 0.62750 (76)  
AUC(P): 0.68317 (60)  
AUC(S): 0.46928 (34)

ranking function: **scaled** 0.18013 +0.03788

| size | N [685] |     | P [112] |     | S [109] |     | P+S [24] |     |
|------|---------|-----|---------|-----|---------|-----|----------|-----|
|      | abs     | rel | abs     | rel | abs     | rel | abs      | rel |
| 10   | 5 +1    | 50% | 3 -2    | 30% | 2 +1    | 20% | 0        | 0%  |
| 30   | 12 -6   | 40% | 13 +5   | 43% | 4 +1    | 13% | 1        | 3%  |
| 60   | 27 -5   | 45% | 24 +3   | 40% | 7 +2    | 12% | 2        | 3%  |
| 90   | 44 -5   | 49% | 30 -2   | 33% | 11 +4   | 12% | 5 +3     | 6%  |
| 120  | 62 -2   | 52% | 40      | 33% | 12 -1   | 10% | 6 +3     | 5%  |
| 150  | 78 -7   | 52% | 50 +7   | 33% | 14 -3   | 9%  | 8 +3     | 5%  |

configuration: 100-gini-2-d4  $F_1$  score: 0.62300 (79)  
AUC(P): 0.63654 (84)  
AUC(S): 0.48970 (16)

ranking function: **zscore** 0.19267 +0.08769

| size | N [685] |     | P [112] |     | S [109] |     | P+S [24] |     |
|------|---------|-----|---------|-----|---------|-----|----------|-----|
|      | abs     | rel | abs     | rel | abs     | rel | abs      | rel |
| 10   | 4 -2    | 40% | 3       | 30% | 3 +2    | 30% | 0        | 0%  |
| 30   | 11 -7   | 37% | 12 +2   | 40% | 6 +4    | 20% | 1 +1     | 3%  |
| 60   | 29 -6   | 48% | 21 +3   | 35% | 8 +3    | 13% | 2        | 3%  |
| 90   | 48 +1   | 53% | 29 -1   | 32% | 9 -2    | 10% | 4 +2     | 4%  |
| 120  | 63 -4   | 52% | 37      | 31% | 13 -1   | 11% | 7 +5     | 6%  |
| 150  | 88 -2   | 59% | 40 +1   | 27% | 15 -2   | 10% | 7 +3     | 5%  |

configuration: 100-gini-2-d4  $F_1$  score: 0.62300 (79)  
AUC(P): 0.63654 (84)  
AUC(S): 0.48970 (16)

ranking function: **zscore** 0.19044 +0.05669

| size | N [685] |     | P [112] |     | S [109] |     | P+S [24] |     |
|------|---------|-----|---------|-----|---------|-----|----------|-----|
|      | abs     | rel | abs     | rel | abs     | rel | abs      | rel |
| 10   | 4 -2    | 40% | 3       | 30% | 3 +2    | 30% | 0        | 0%  |
| 30   | 11 -7   | 37% | 12 +2   | 40% | 6 +4    | 20% | 1 +1     | 3%  |
| 60   | 29 -6   | 48% | 21 +3   | 35% | 8 +3    | 13% | 2        | 3%  |
| 90   | 48 +1   | 53% | 29 -1   | 32% | 9 -2    | 10% | 4 +2     | 4%  |
| 120  | 63 -4   | 52% | 37      | 31% | 13 -1   | 11% | 7 +5     | 6%  |
| 150  | 88 -2   | 59% | 40 +1   | 27% | 15 -2   | 10% | 7 +3     | 5%  |

configuration: 100-gini-2-d4  $F_1$  score: 0.62300 (79)  
AUC(P): 0.63654 (84)  
AUC(S): 0.48970 (16)

(a) progressive weights

(b) split weights

**Table 17:** Results of simulated recruitment for the **MUST selection model (3 years shift)** configurations with best recruitment score (given at the top of each table). The differences in recruitment compared to the model configuration with highest  $F_1$  score are highlighted with green (positive) and red (negative) colour. For each of the ranking functions the used model configuration and its prediction quality measured with  $F_1$  score and AUC is given for reference (rank of the measure among all configurations is given in brackets).

| $F_1$ score   | configuration     |
|---------------|-------------------|
| <b>0.6695</b> | 1000-entropy-2-d9 |
| <b>0.6695</b> | 100-gini-2-d9     |
| <b>0.6695</b> | 600-gini-2-d8     |
| ...           |                   |
| <b>0.6075</b> | 400-entropy-2-d4  |
| <b>0.606</b>  | 200-entropy-2-d4  |
| <b>0.602</b>  | 100-entropy-2-d4  |

| AUC(P)         | configuration    |
|----------------|------------------|
| <b>0.83968</b> | 200-entropy-2-d7 |
| <b>0.82861</b> | 200-gini-2-d10   |
| <b>0.82806</b> | 200-gini-2-d8    |
| ...            |                  |
| <b>0.70792</b> | 100-gini-2-d6    |
| <b>0.70761</b> | 400-entropy-2-d4 |
| <b>0.69667</b> | 100-gini-2-d7    |

| AUC(S)         | configuration     |
|----------------|-------------------|
| <b>0.67518</b> | 100-entropy-2-d7  |
| <b>0.64823</b> | 1000-entropy-2-d5 |
| <b>0.63406</b> | 400-entropy-2-d9  |
| ...            |                   |
| <b>0.45221</b> | 800-gini-2-d7     |
| <b>0.43645</b> | 200-gini-2-d10    |
| <b>0.43481</b> | 100-gini-2-d4     |

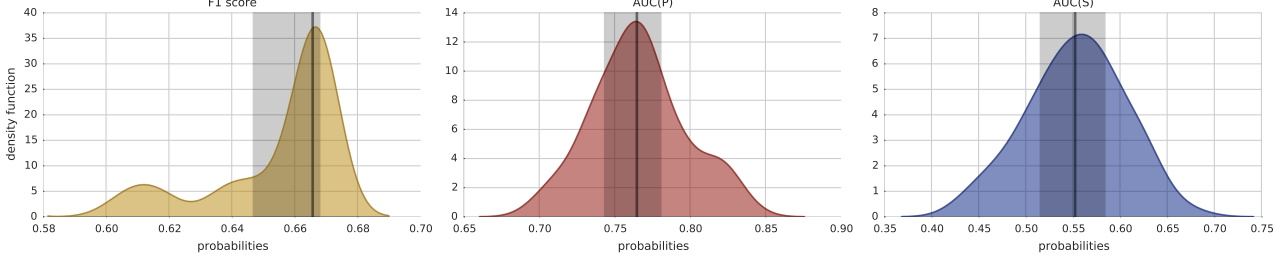

**Figure 17:** Distribution of quality measures across all **MUST selection model (5 years shift)** configurations. The grey area shows interquartile range and thick vertical line indicates the median value. Tables show 3 top/bottom scores and corresponding model parameters.

ranking function: **sum** 0.16384 +0.05031

| size | N [733] |     | P [113] |     | S [108] |     | P+S [24] |     |
|------|---------|-----|---------|-----|---------|-----|----------|-----|
|      | abs     | rel | abs     | rel | abs     | rel | abs      | rel |
| 10   | 1       | 10% | 9 +1    | 90% | 0 -1    | 0%  | 0        | 0%  |
| 30   | 13 -3   | 43% | 16 +3   | 53% | 0 -1    | 0%  | 1 +1     | 3%  |
| 60   | 30 -6   | 50% | 23 +3   | 38% | 4 +2    | 7%  | 3 +1     | 5%  |
| 90   | 54 -5   | 60% | 26 +2   | 29% | 5 +1    | 6%  | 5 +2     | 6%  |
| 120  | 72 -3   | 60% | 33 +4   | 28% | 8 -1    | 7%  | 7        | 6%  |
| 150  | 90 -5   | 60% | 38 +1   | 25% | 13 +3   | 9%  | 9 +1     | 6%  |

configuration: 100-gini-2-d8

$F_1$  score: 0.66850 (15)  
AUC(P): 0.80261 (11)  
AUC(S): 0.51358 (65)

ranking function: **sum** 0.14543 +0.02477

| size | N [733] |     | P [113] |     | S [108] |     | P+S [24] |     |
|------|---------|-----|---------|-----|---------|-----|----------|-----|
|      | abs     | rel | abs     | rel | abs     | rel | abs      | rel |
| 10   | 3 +2    | 30% | 7 -1    | 70% | 0 -1    | 0%  | 0        | 0%  |
| 30   | 13 -3   | 43% | 14 +1   | 47% | 1       | 3%  | 2 +2     | 7%  |
| 60   | 33 -3   | 55% | 19 -1   | 32% | 4 +2    | 7%  | 4 +2     | 7%  |
| 90   | 55 -4   | 61% | 22 -2   | 24% | 8 +4    | 9%  | 5 +2     | 6%  |
| 120  | 76 +1   | 63% | 29      | 24% | 9       | 8%  | 6 -1     | 5%  |
| 150  | 96 +1   | 64% | 35 -2   | 23% | 11 +1   | 7%  | 8        | 5%  |

configuration: 100-gini-2-d9

$F_1$  score: 0.66950 (2)  
AUC(P): 0.77615 (27)  
AUC(S): 0.54445 (49)

ranking function: **scaled** 0.11148 +0.06709

| size | N [733] |     | P [113] |     | S [108] |     | P+S [24] |     |
|------|---------|-----|---------|-----|---------|-----|----------|-----|
|      | abs     | rel | abs     | rel | abs     | rel | abs      | rel |
| 10   | 2 -1    | 20% | 8 +1    | 80% | 0       | 0%  | 0        | 0%  |
| 30   | 16 -1   | 53% | 13 +2   | 43% | 0 -2    | 0%  | 1 +1     | 3%  |
| 60   | 35 -6   | 58% | 18 +2   | 30% | 5 +2    | 8%  | 2 +2     | 3%  |
| 90   | 56 -6   | 62% | 22 +2   | 24% | 9 +3    | 10% | 3 +1     | 3%  |
| 120  | 75 -12  | 62% | 31 +8   | 26% | 11 +5   | 9%  | 3 -1     | 2%  |
| 150  | 101 -9  | 67% | 33 +9   | 22% | 12 +2   | 8%  | 4 -2     | 3%  |

configuration: 100-gini-2-d8

$F_1$  score: 0.66850 (15)  
AUC(P): 0.80261 (11)  
AUC(S): 0.51358 (65)

ranking function: **scaled** 0.12381 +0.02870

| size | N [733] |     | P [113] |     | S [108] |     | P+S [24] |     |
|------|---------|-----|---------|-----|---------|-----|----------|-----|
|      | abs     | rel | abs     | rel | abs     | rel | abs      | rel |
| 10   | 2 -1    | 20% | 8 +1    | 80% | 0       | 0%  | 0        | 0%  |
| 30   | 16 -1   | 53% | 13 +2   | 43% | 0 -2    | 0%  | 1 +1     | 3%  |
| 60   | 35 -6   | 58% | 18 +2   | 30% | 5 +2    | 8%  | 2 +2     | 3%  |
| 90   | 56 -6   | 62% | 22 +2   | 24% | 9 +3    | 10% | 3 +1     | 3%  |
| 120  | 75 -12  | 62% | 31 +8   | 26% | 11 +5   | 9%  | 3 -1     | 2%  |
| 150  | 101 -9  | 67% | 33 +9   | 22% | 12 +2   | 8%  | 4 -2     | 3%  |

configuration: 100-gini-2-d8

$F_1$  score: 0.66850 (15)  
AUC(P): 0.80261 (11)  
AUC(S): 0.51358 (65)

ranking function: **zscore** 0.06883 +0.05417

| size | N [733] |     | P [113] |     | S [108] |     | P+S [24] |     |
|------|---------|-----|---------|-----|---------|-----|----------|-----|
|      | abs     | rel | abs     | rel | abs     | rel | abs      | rel |
| 10   | 3 -1    | 30% | 7 +1    | 70% | 0       | 0%  | 0        | 0%  |
| 30   | 19      | 63% | 11 +2   | 37% | 0 -2    | 0%  | 0        | 0%  |
| 60   | 38 -4   | 63% | 15      | 25% | 6 +3    | 10% | 1 +1     | 2%  |
| 90   | 58 -8   | 64% | 21 +3   | 23% | 9 +4    | 10% | 2 +1     | 2%  |
| 120  | 78 -11  | 65% | 27 +8   | 22% | 11 +3   | 9%  | 4        | 3%  |
| 150  | 105 -4  | 70% | 30 +5   | 20% | 11      | 7%  | 4 -1     | 3%  |

configuration: 100-gini-2-d8

$F_1$  score: 0.66850 (15)  
AUC(P): 0.80261 (11)  
AUC(S): 0.51358 (65)

ranking function: **zscore** 0.12087 +0.03332

| size | N [733] |     | P [113] |     | S [108] |     | P+S [24] |     |
|------|---------|-----|---------|-----|---------|-----|----------|-----|
|      | abs     | rel | abs     | rel | abs     | rel | abs      | rel |
| 10   | 5 +1    | 50% | 4 -2    | 40% | 1 +1    | 10% | 0        | 0%  |
| 30   | 15 -4   | 50% | 12 +3   | 40% | 3 +1    | 10% | 0        | 0%  |
| 60   | 39 -3   | 65% | 15      | 25% | 5 +2    | 8%  | 1 +1     | 2%  |
| 90   | 62 -4   | 69% | 17 -1   | 19% | 9 +4    | 10% | 2 +1     | 2%  |
| 120  | 83 -6   | 69% | 22 +3   | 18% | 13 +5   | 11% | 2 -2     | 2%  |
| 150  | 105 -4  | 70% | 26 +1   | 17% | 16 +5   | 11% | 3 -2     | 2%  |

configuration: 100-entropy-2-d5

$F_1$  score: 0.63300 (72)  
AUC(P): 0.74166 (65)  
AUC(S): 0.58055 (25)

(a) progressive weights

(b) split weights

**Table 18:** Results of simulated recruitment for the **MUST selection model (5 years shift)** configurations with best recruitment score (given at the top of each table). The differences in recruitment compared to the model configuration with highest  $F_1$  score are highlighted with green (positive) and red (negative) colour. For each of the ranking functions the used model configuration and its prediction quality measured with  $F_1$  score and AUC is given for reference (rank of the measure among all configurations is given in brackets).

## 2.3 Probabilities and selection models confidence

**eFigure 18** compares the distribution of probabilities returned by the selection models when no time shift is used. For CHECK, MUST and HOSTAS these distributions were relatively similar for both **P** and **S** labels, but differed more for DIGICOD (mostly for **P**) and PROCOAC (mostly for **S**). These differences are a result of reduced set of attributes used by the models, limited to what was possible to map and harmonise to CHECK. However, the differences are not large enough to invalidate our approach, and mainly affect the probabilities related to pain.

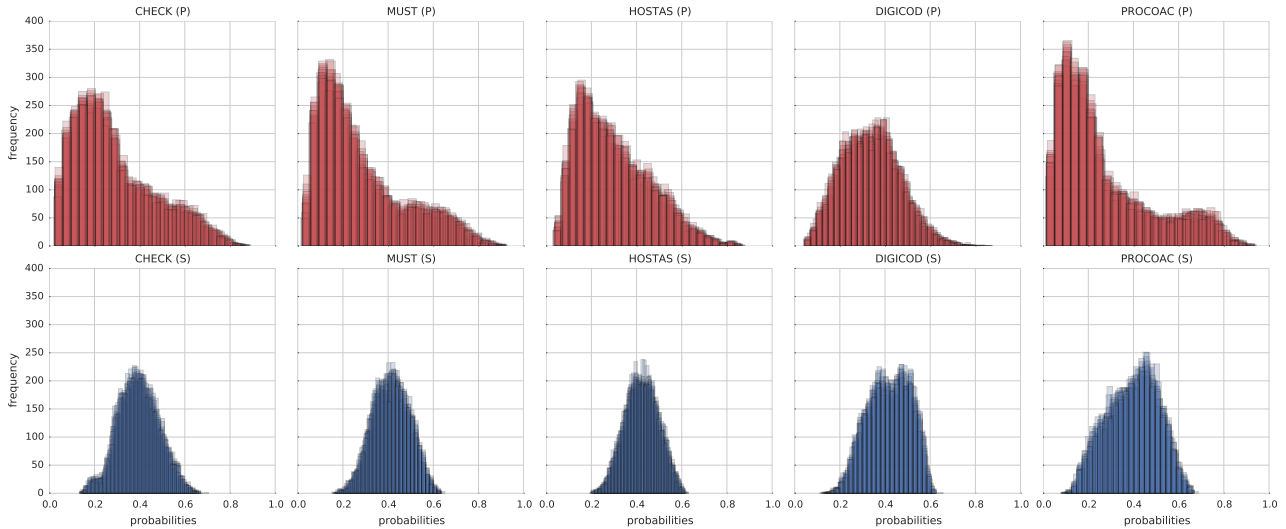

**eFigure 18:** Distribution of model selection probabilities for all cohorts. In each panel, the histograms for all CV-repeats are superimposed on top of each other.

**eFigure 19** illustrates the effect of the time shift. The selection model probabilities tends to get more narrow (especially for **S** label) with increasing shift. The maximum probability decreases and the entire distributions lean more towards 0, which represent reduced confidence the models have in the prediction made for increasing shift.

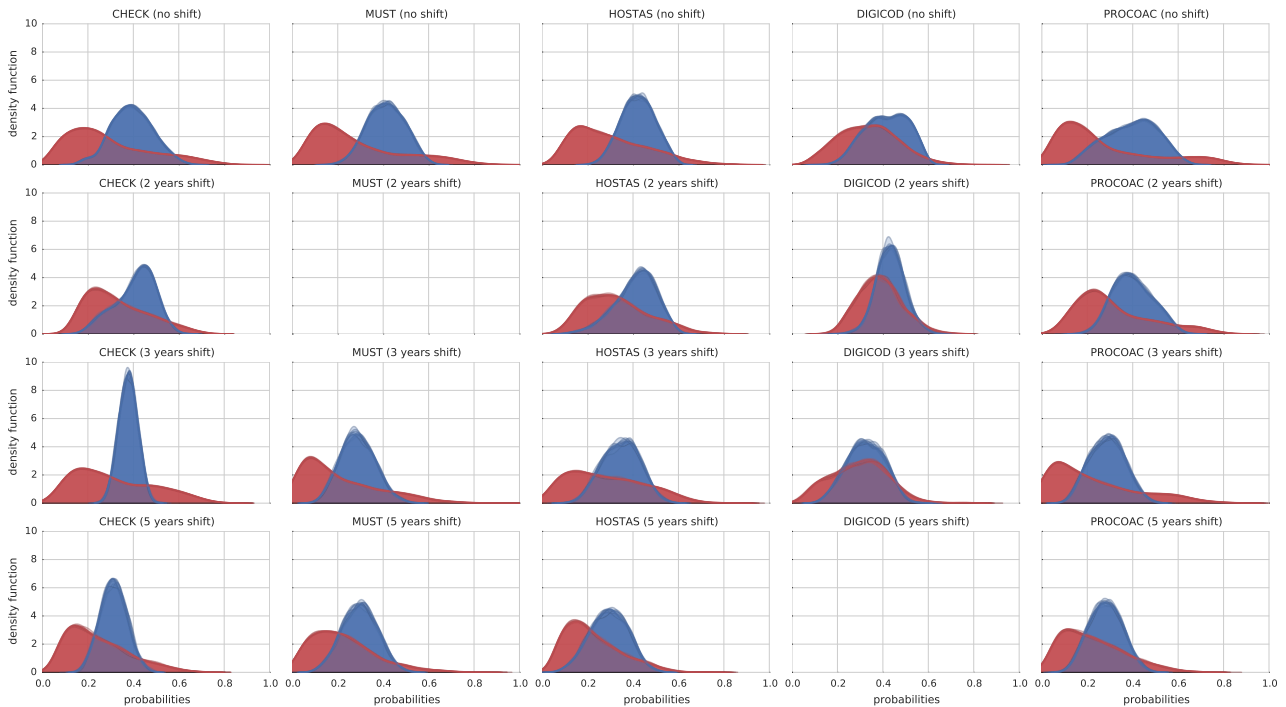

**eFigure 19:** Change in probability distributions with increasing time shift. The **P** probability is plot in red, and **S** in blue. In each panel, the kernel density functions for all CV-repeats are superimposed on top of each other. Empty panel is shown when a particular shift was not applicable.

eFigure 20–24 show the joint distribution of probabilities returned by the selection models for the training data (harmonised CHECK cohort) for increasing shift.

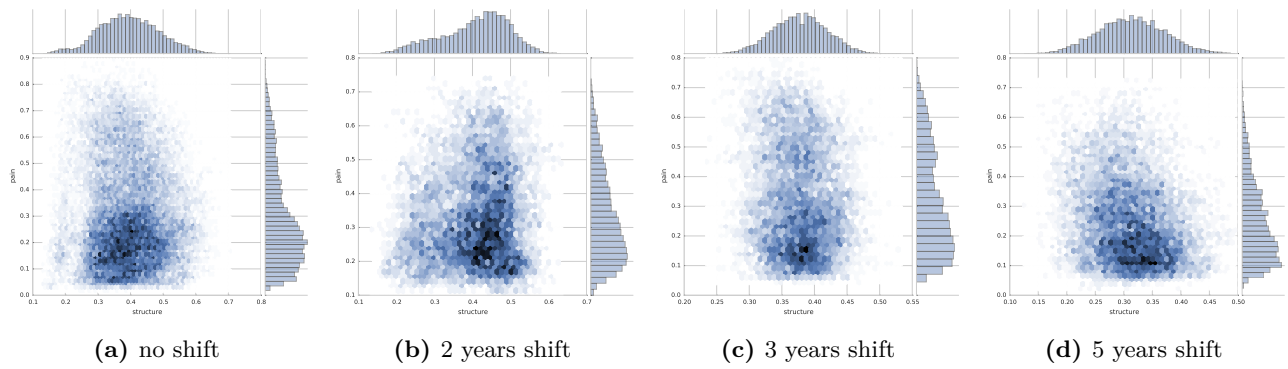

eFigure 20: Joint probability distribution of CHECK models confidence in predicting P and S labels on training set for increasing shift.

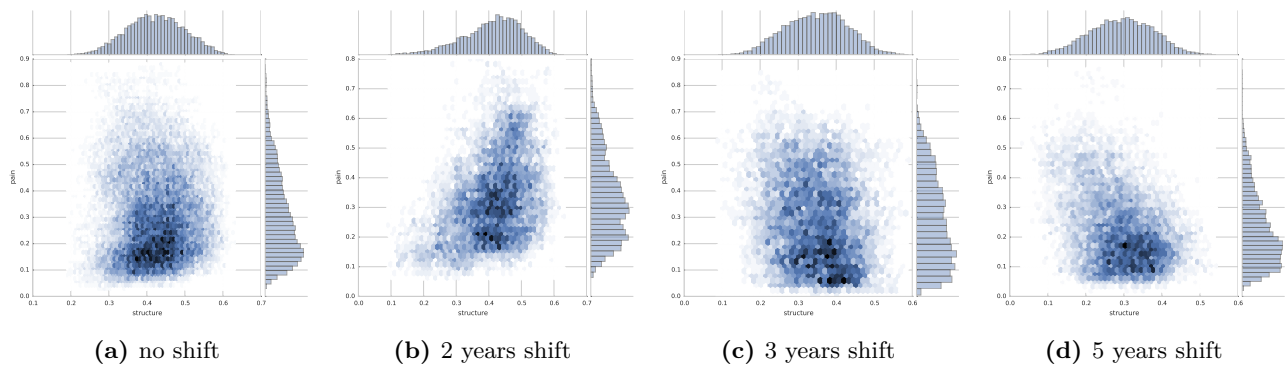

eFigure 21: Joint probability distribution of HOSTAS models confidence in predicting P and S labels on training set for increasing shift.

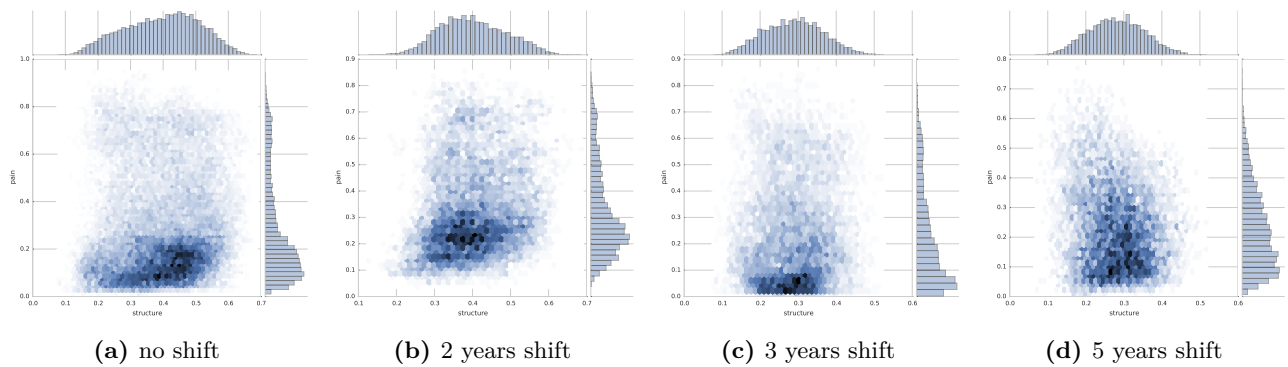

eFigure 22: Joint probability distribution of PROCOAC models confidence in predicting P and S labels on training set for increasing shift.

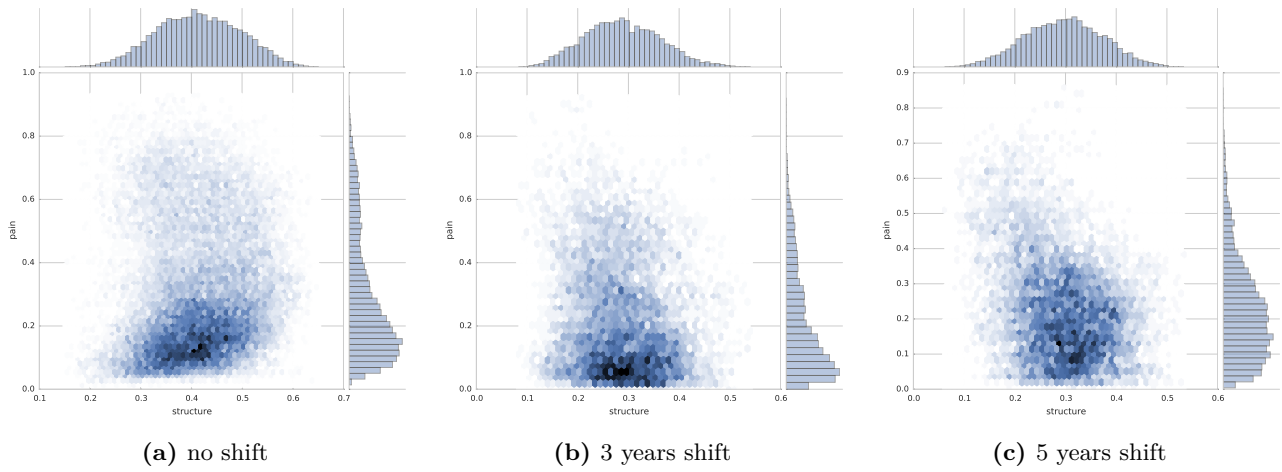

**eFigure 23:** Joint probability distribution of **MUST** models confidence in predicting **P** and **S** labels on training set for increasing shift.

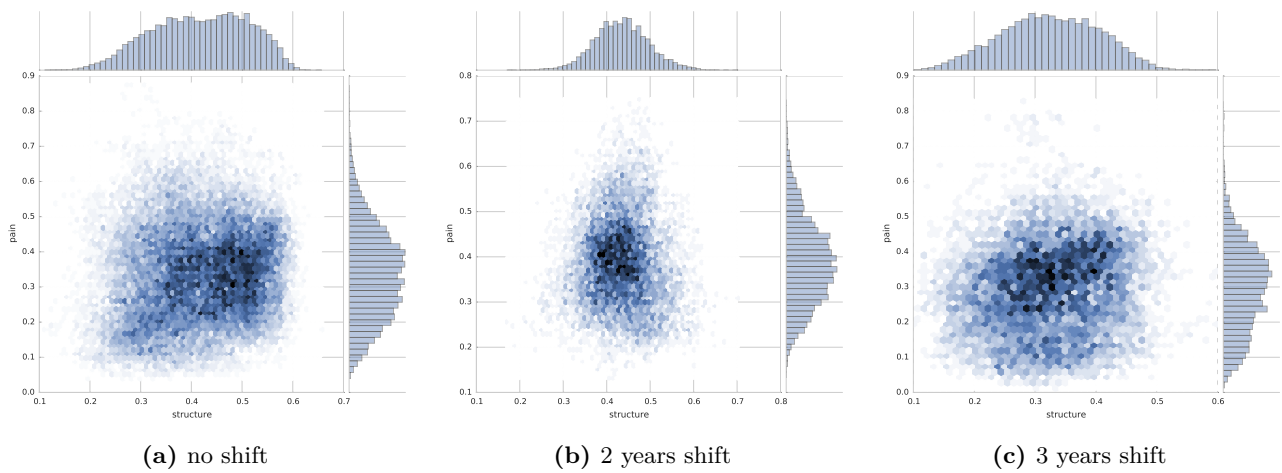

**eFigure 24:** Joint probability distribution of **DIGICOD** models confidence in predicting **P** and **S** labels on training set for increasing shift.

The following figures show the joint distribution divided into categories. The models confidence in predictions for non-progressive periods (**N**) remains unchanged with increasing shift, but for others, the distribution peaks slowly move towards lower valued regions.

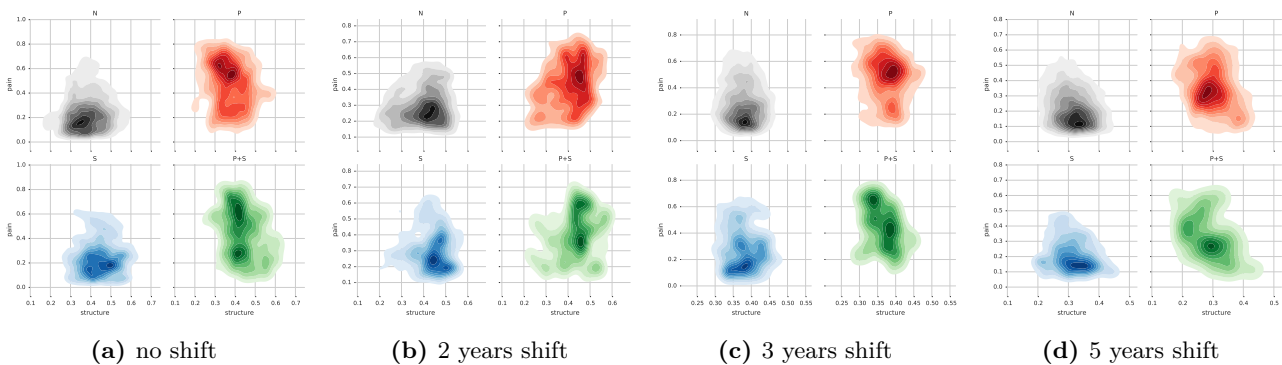

**eFigure 25:** Joint probability distribution of **CHECK** models confidence in predicting **P** and **S** labels on training set for increasing shift divided by the period category.

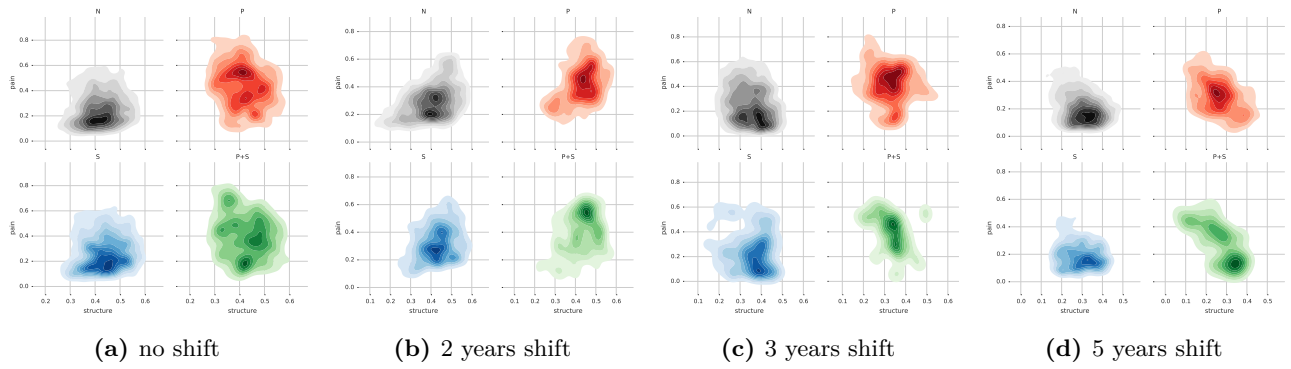

**eFigure 26:** Joint probability distribution of **HOSTAS** models confidence in predicting **P** and **S** labels on training set for increasing shift divided by the period category.

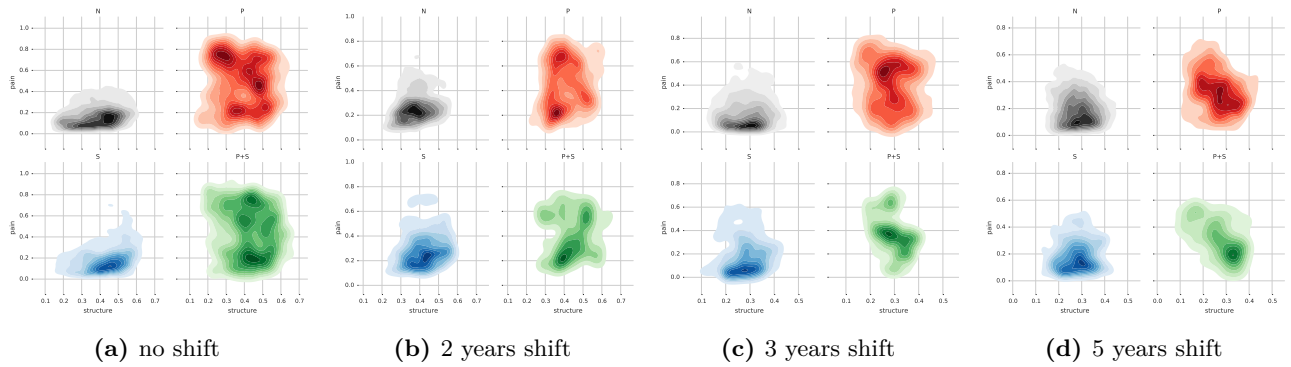

**eFigure 27:** Joint probability distribution of **PROCOAC** models confidence in predicting **P** and **S** labels on training set for increasing shift divided by the period category.

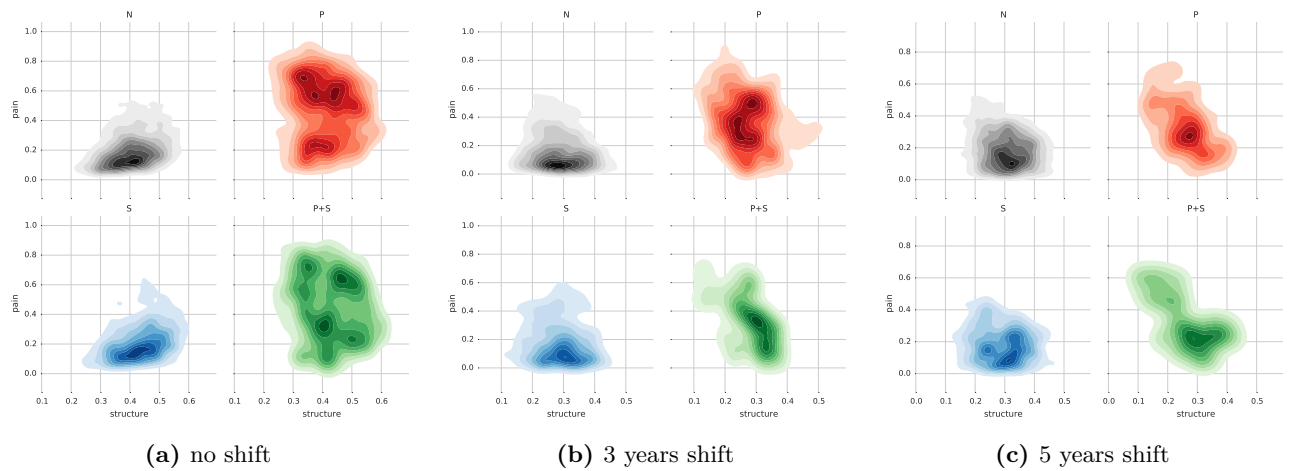

**eFigure 28:** Joint probability distribution of **MUST** models confidence in predicting **P** and **S** labels on training set for increasing shift divided by the period category.

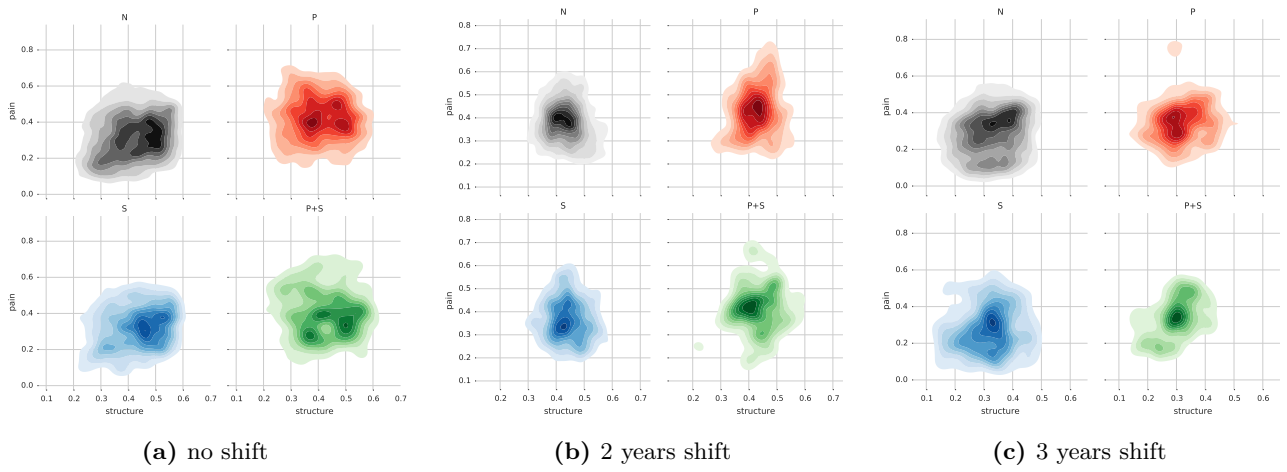

**eFigure 29:** Joint probability distribution of **DIGICOD** models confidence in predicting **P** and **S** labels on training set for increasing shift divided by the period category.



The following figures show the influence of time shift on probabilities returned by the selection models for the harmonised cohort data (real patients data, rather than harmonised CHECK periods). With 2–3 year shift, the distributions remain roughly equivalent to what was seen in the training set, but for visits more than 4 years prior, the distributions start to differ substantially. This indicates that in such cases, the prediction of the selection models might not be reliable.

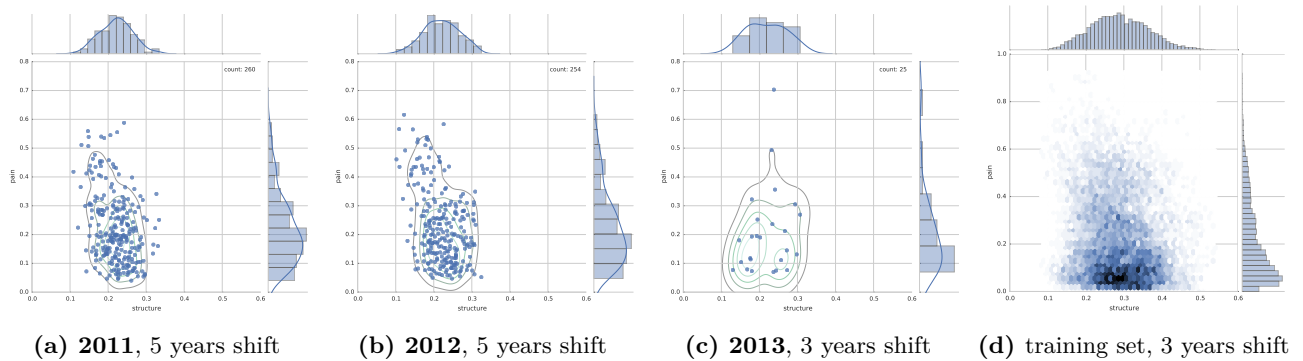

**eFigure 30:** Joint probability distribution of **MUST** selection models applied to harmonised patient data. Each panel shows results of a model with a specific shift, applied to data from a specific visit year, except the last panel, where for comparison the distribution on the training data (from eFigure 23) is shown.

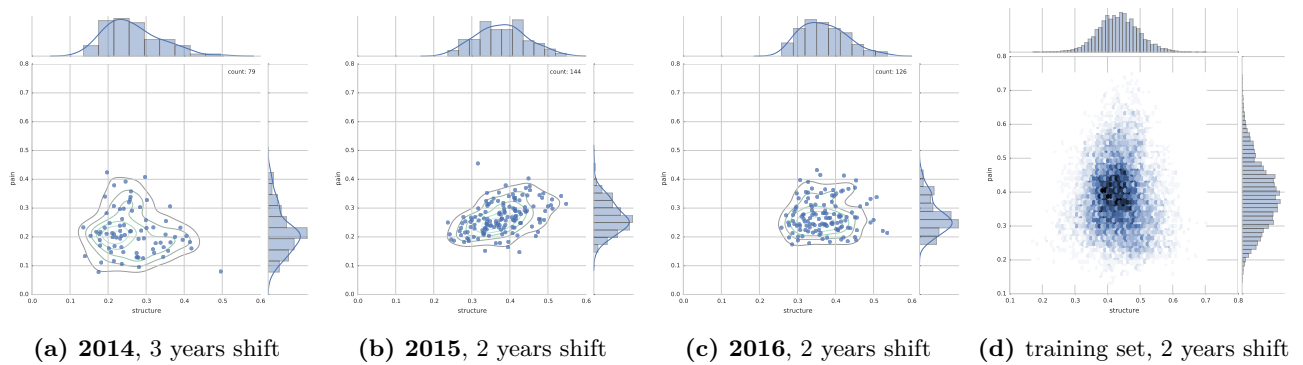

**eFigure 31:** Joint probability distribution of **DIGICOD** selection models applied to harmonised patient data. Each panel shows results of a model with a specific shift, applied to data from a specific visit year, except the last panel, where for comparison the distribution on the training data (from eFigure 24) is shown.

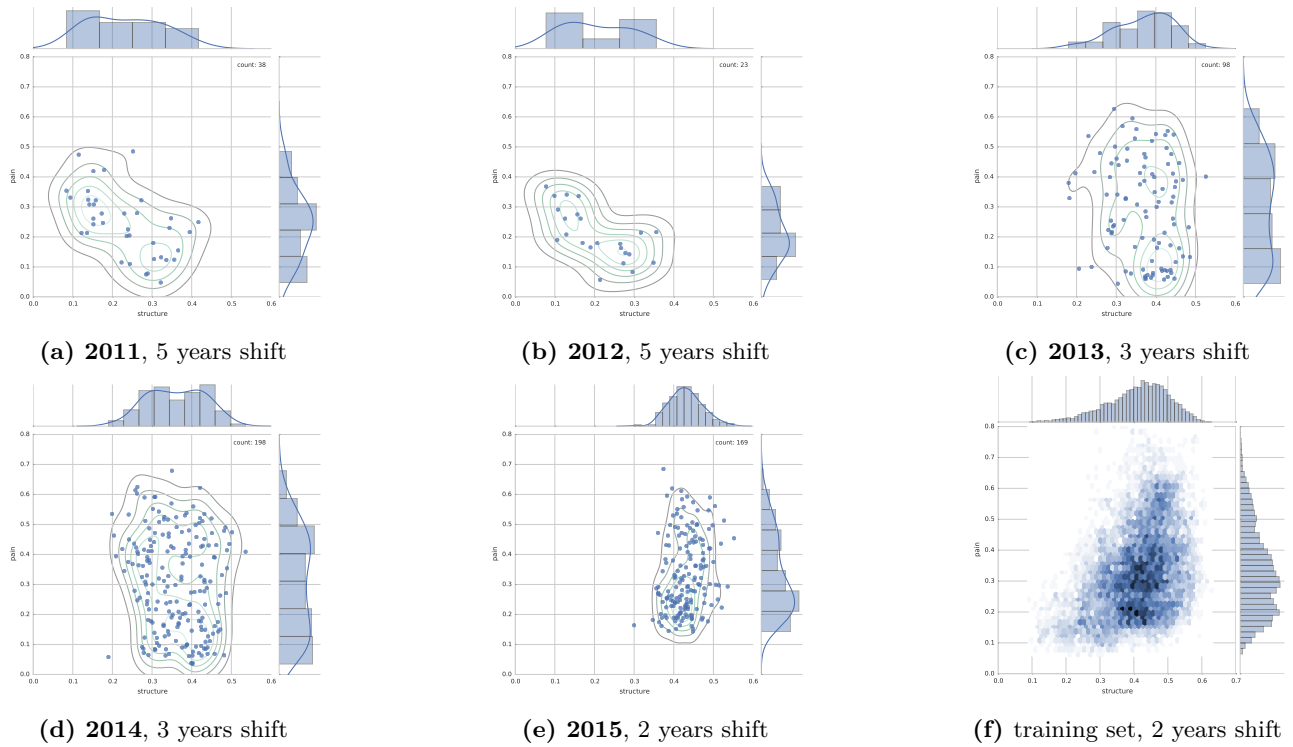

**eFigure 32:** Joint probability distribution of **HOSTAS** selection models applied to harmonised patient data. Each panel shows results of a model with a specific shift, applied to data from a specific visit year, except the last panel, where for comparison the distribution on the training data (from **eFigure 21**) is shown.

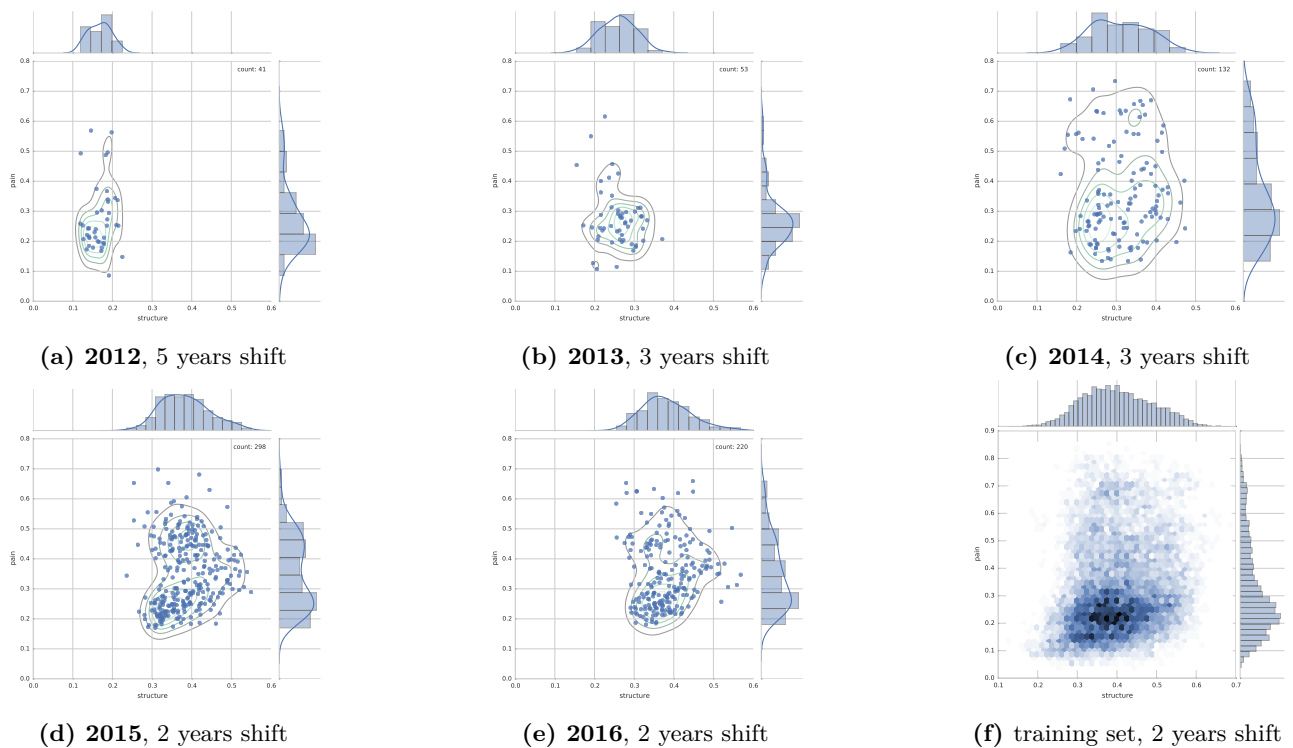

**eFigure 33:** Joint probability distribution of **PROCOAC** selection models applied to harmonised patient data. Each panel shows results of a model with a specific shift, applied to data from a specific visit year, except the last panel, where for comparison the distribution on the training data (from **eFigure 22**) is shown.

## 2.4 Model interpretation — attribute importance

The following figures show the relative importance of the top 50 attributes for all models used in the selection process (the screening model and all the cohort-specific models). The more important an attribute is, the more impact it has on the model output. Two outputs are analysed independently: a probability of **pain-related progression** and a probability of **structure-related progression**. These correspond to the outputs of the two sub-models used by the *duo classifier*.

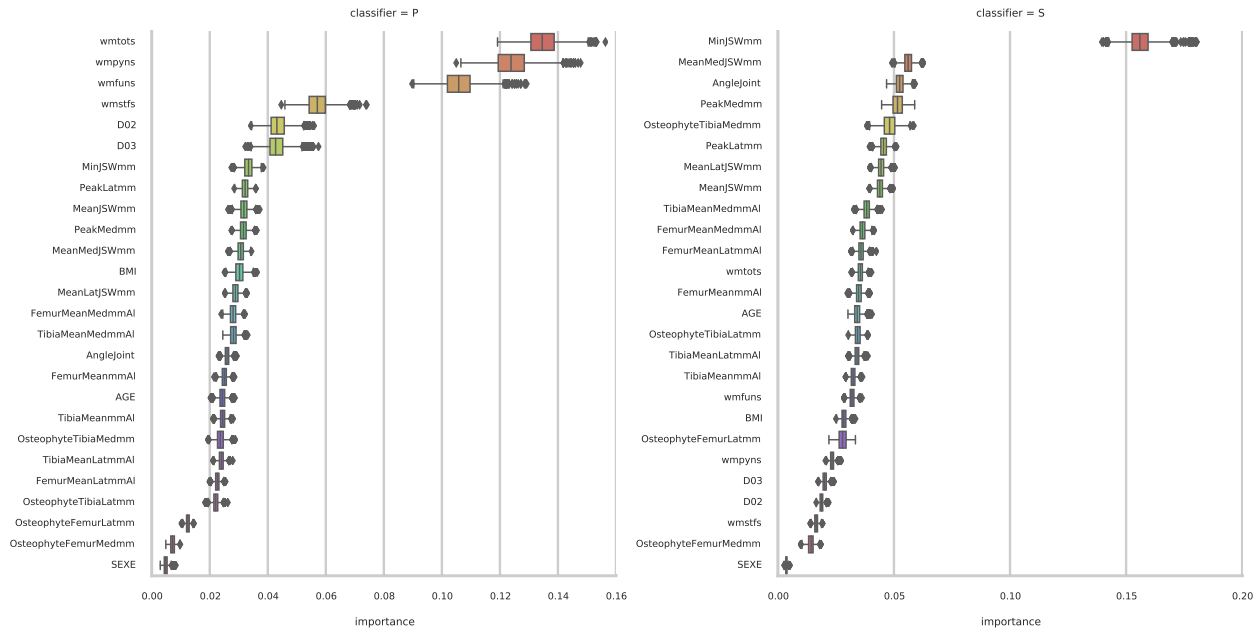

**eFigure 34:** Relative importance of top attributes used by the **screening model**. The two panels show the importance as impact on the probability of progression returned by different sub-models: P (pain-related) on the left, and S (structure-related) on the right. Attributes are listed in order of importance (descending).

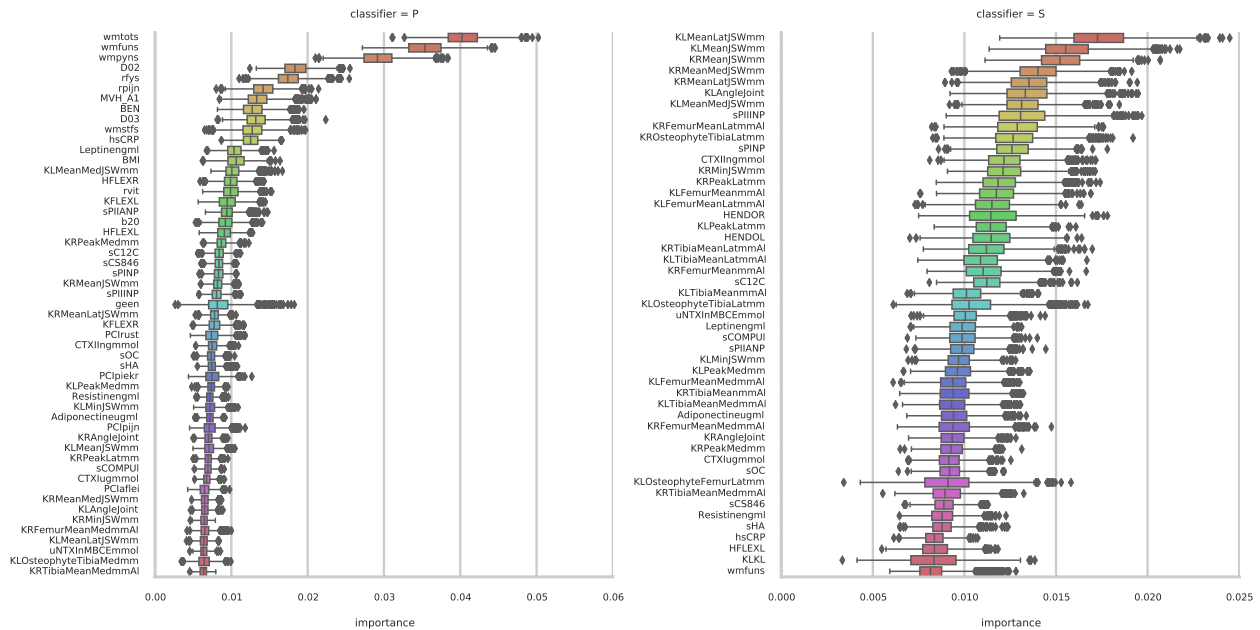

**eFigure 35:** Relative importance of top attributes used by the **CHECK selection model** (2 years shift). The two panels show the importance as impact on the probability of progression returned by different sub-models: P (pain-related) on the left, and S (structure-related) on the right. Attributes are listed in order of importance (descending).

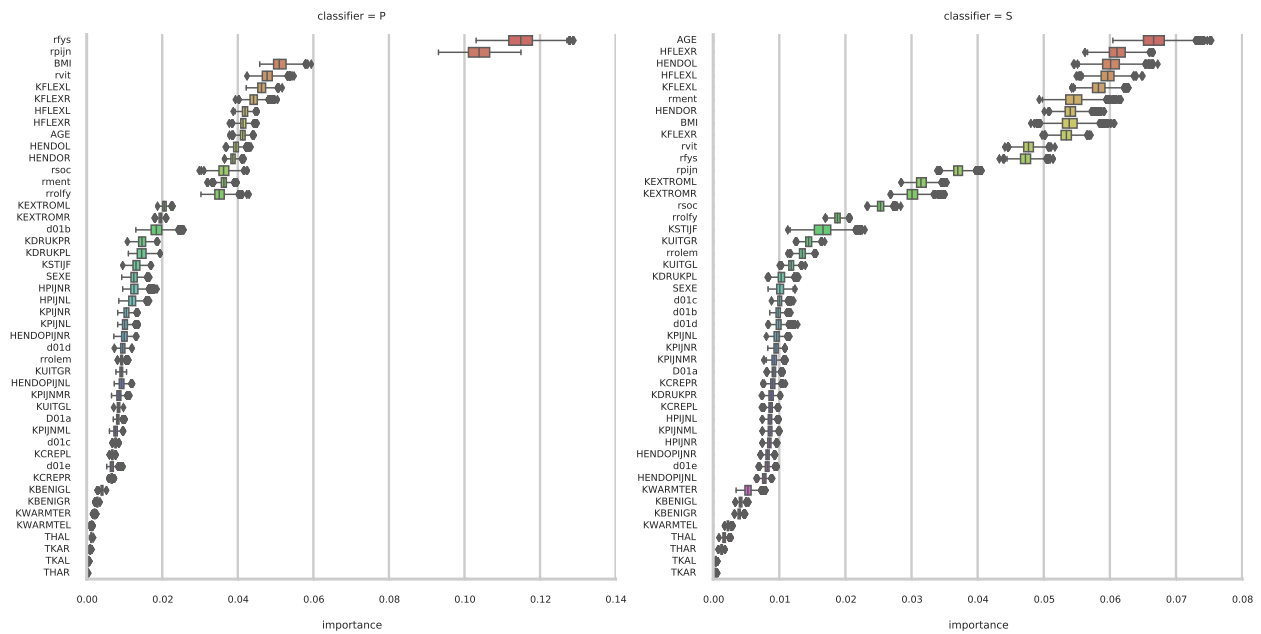

(a) no shift

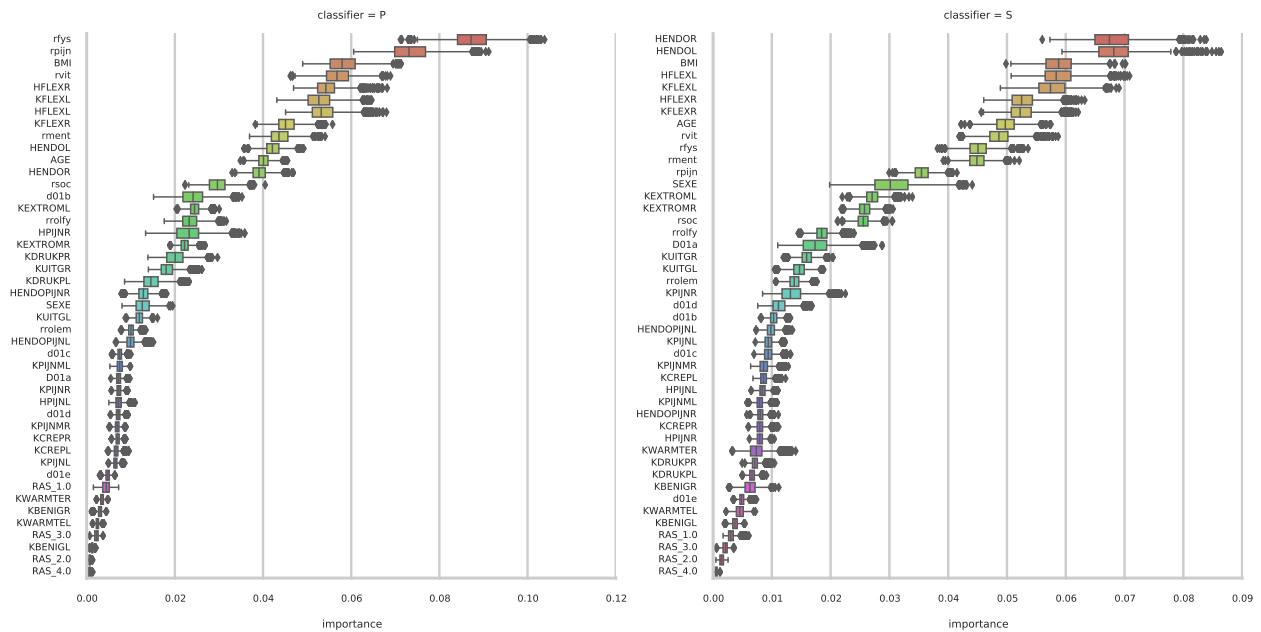

(b) 2 years shift

**eFigure 36:** Relative importance of top attributes used by the **HOSTAS** selection models. The two panels show the importance as impact on the probability of progression returned by different sub-models: pain-related (P) on the left, and structure-related (S) on the right. Attributes are listed in order of importance (descending).

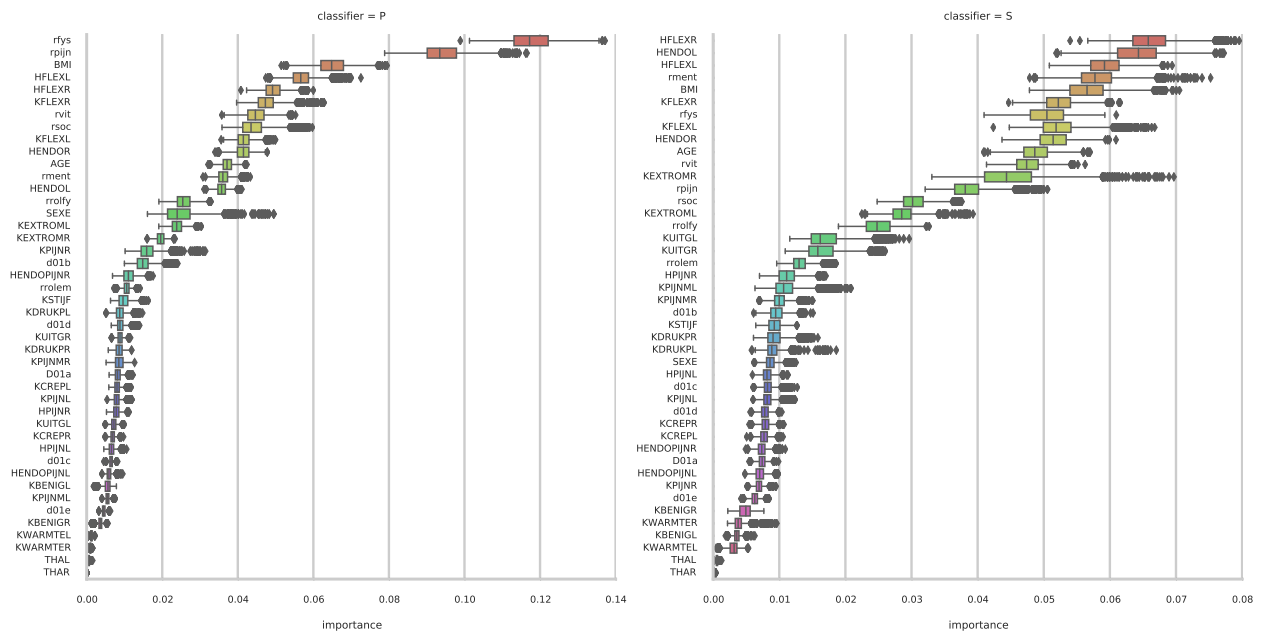

(c) 3 years shift

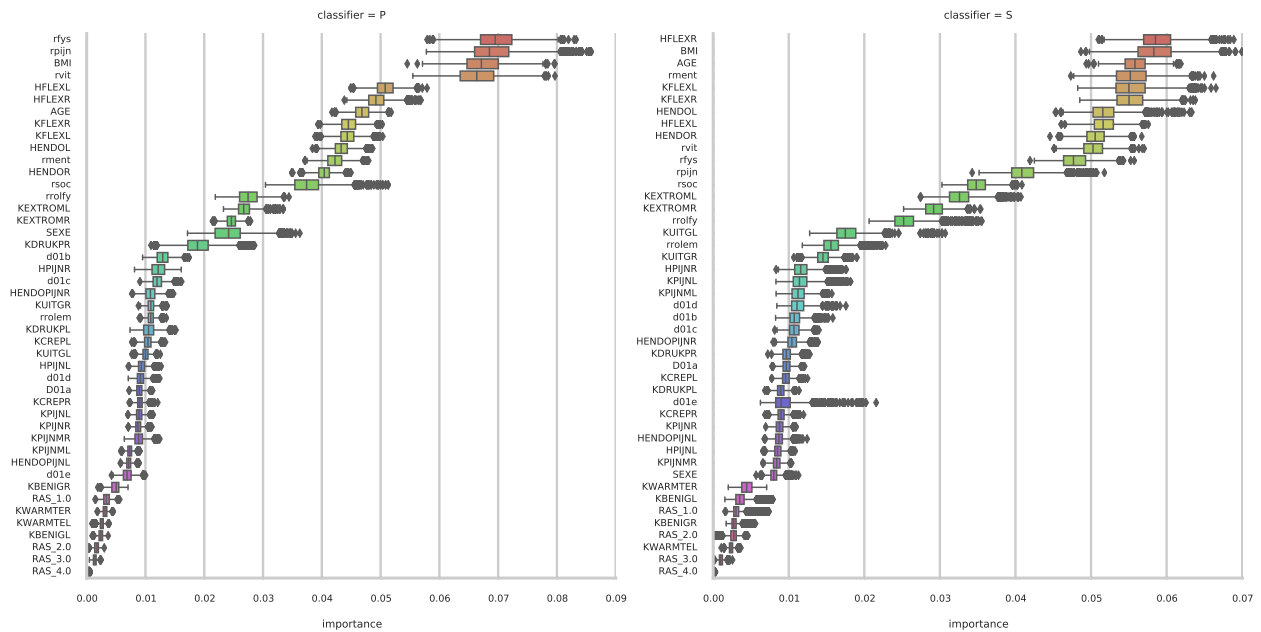

(d) 5 years shift

**eFigure 36:** Relative importance of top attributes used by the **HOSTAS** selection models. The two panels show the importance as impact on the probability of progression returned by different sub-models: pain-related (P) on the left, and structure-related (S) on the right. Attributes are listed in order of importance (descending).

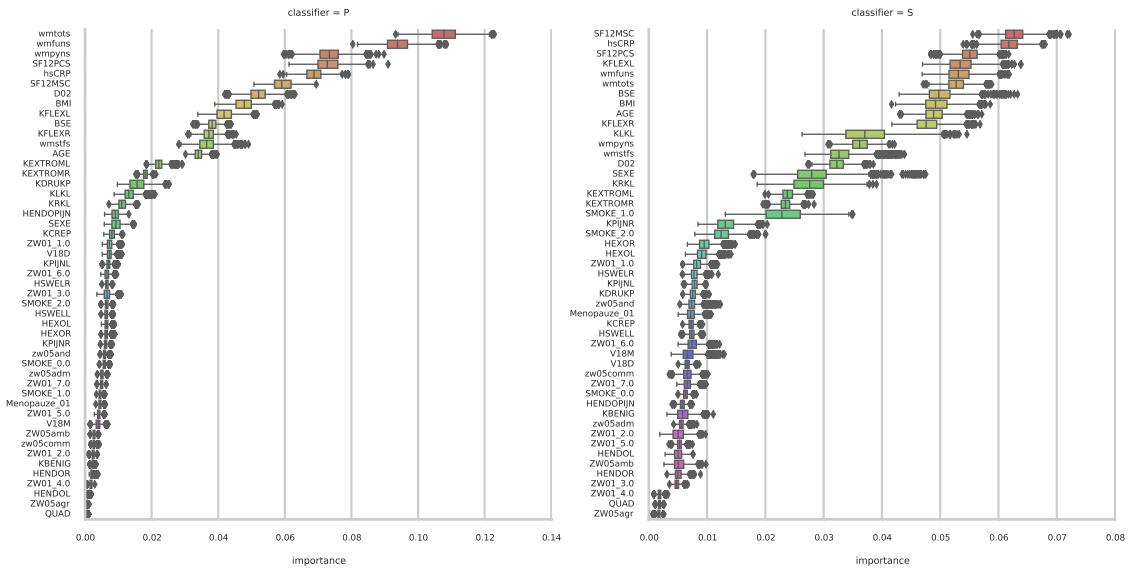

(a) 2 years shift

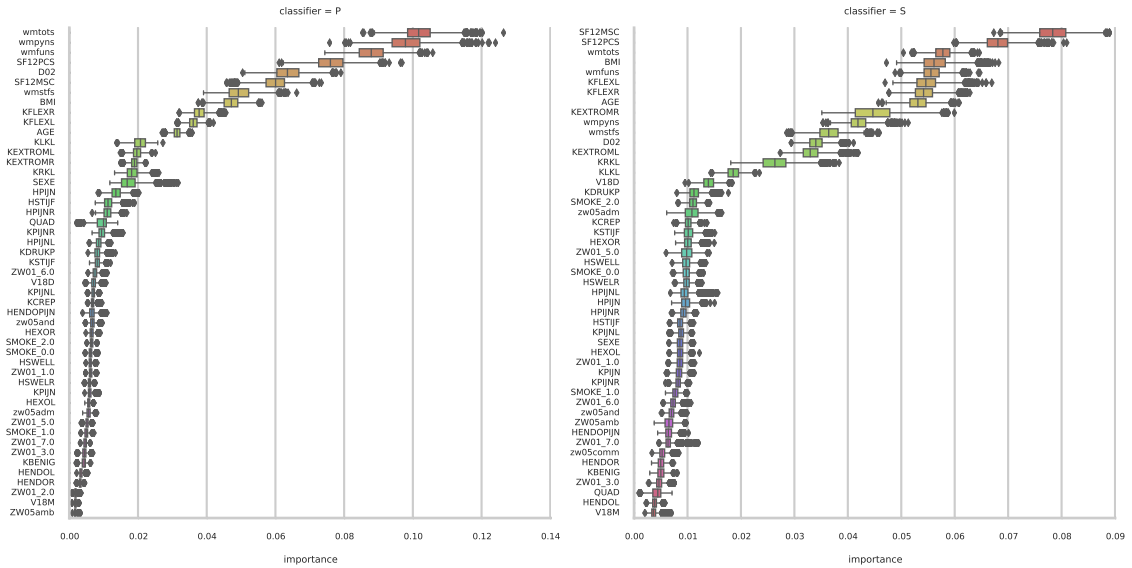

(b) 3 years shift

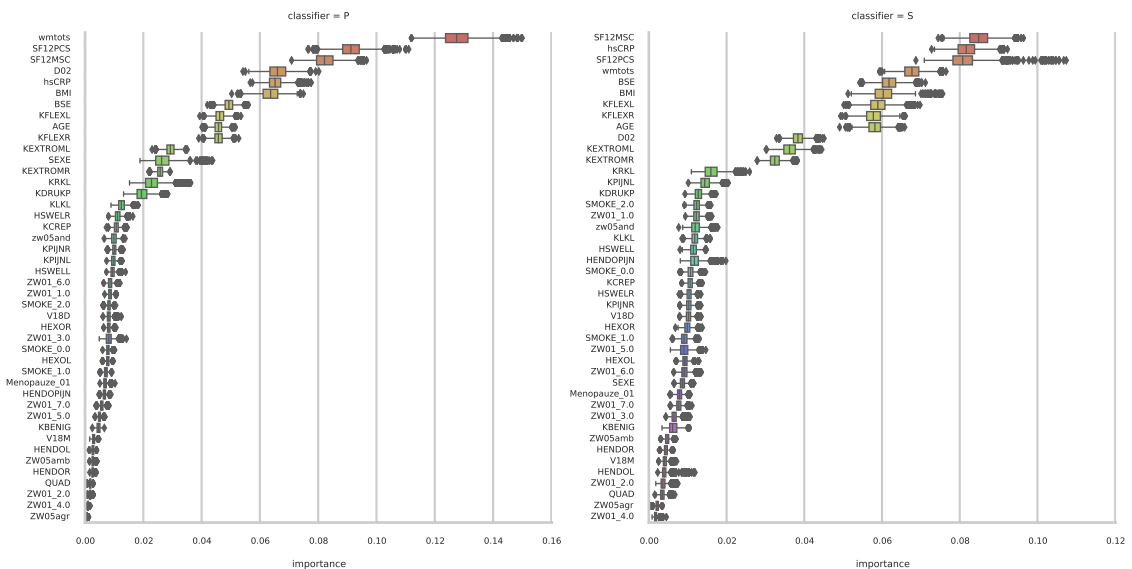

(c) 5 years shift

**eFigure 37:** Relative importance of top attributes used by the PROCOAC selection models. The two panels show the importance as impact on the probability of progression returned by different sub-models: pain-related (P) on the left, and structure-related (S) on the right. Attributes are listed in order of importance (descending).

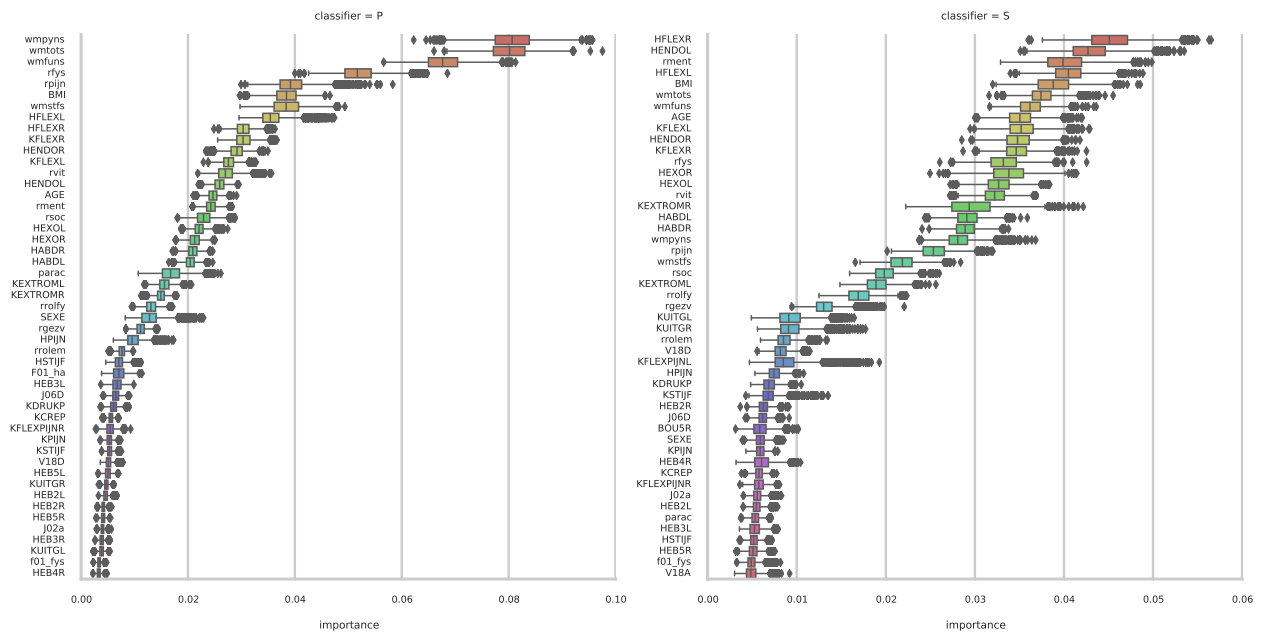

(a) 3 years shift

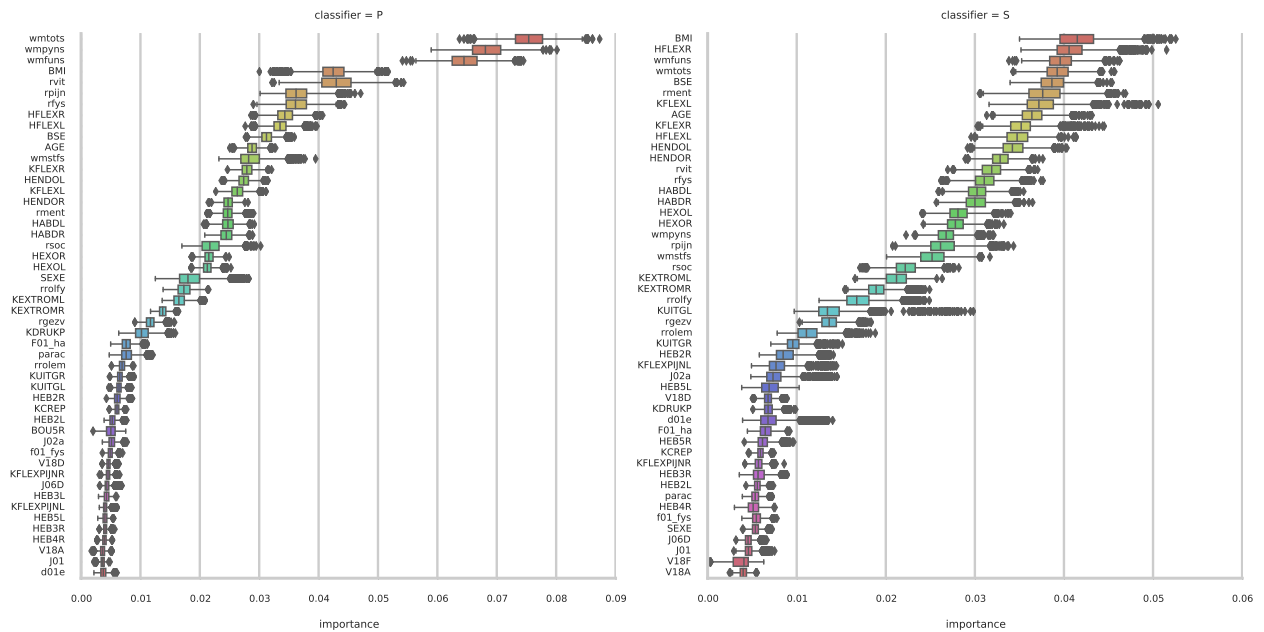

(b) 5 years shift

**eFigure 38:** Relative importance of top attributes used by the MUST selection models. The two panels show the importance as impact on the probability of progression returned by different sub-models: pain-related (P) on the left, and structure-related (S) on the right. Attributes are listed in order of importance (descending).

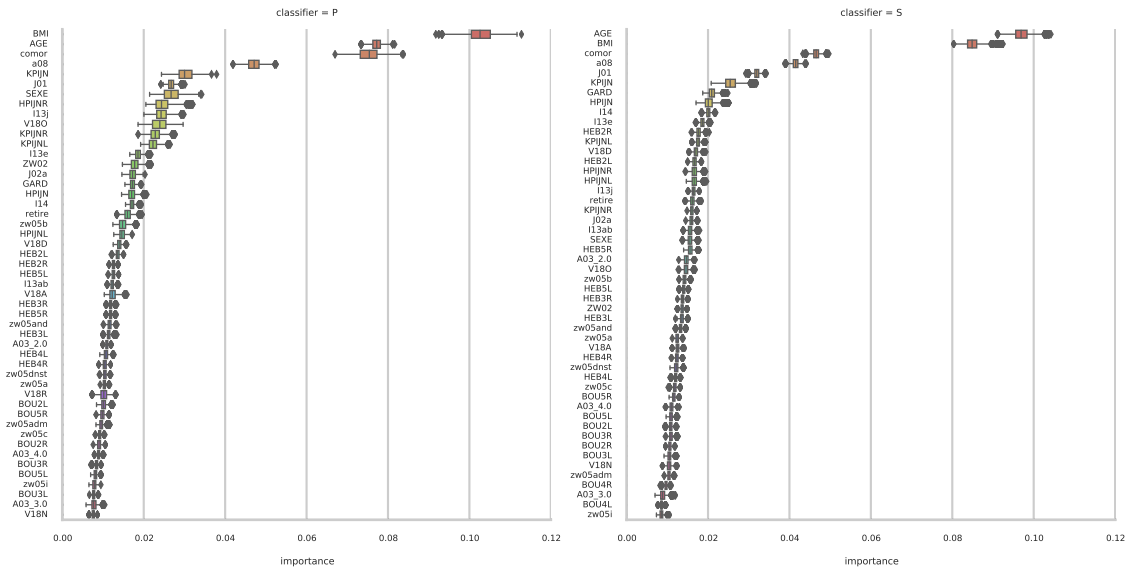

(a) no shift

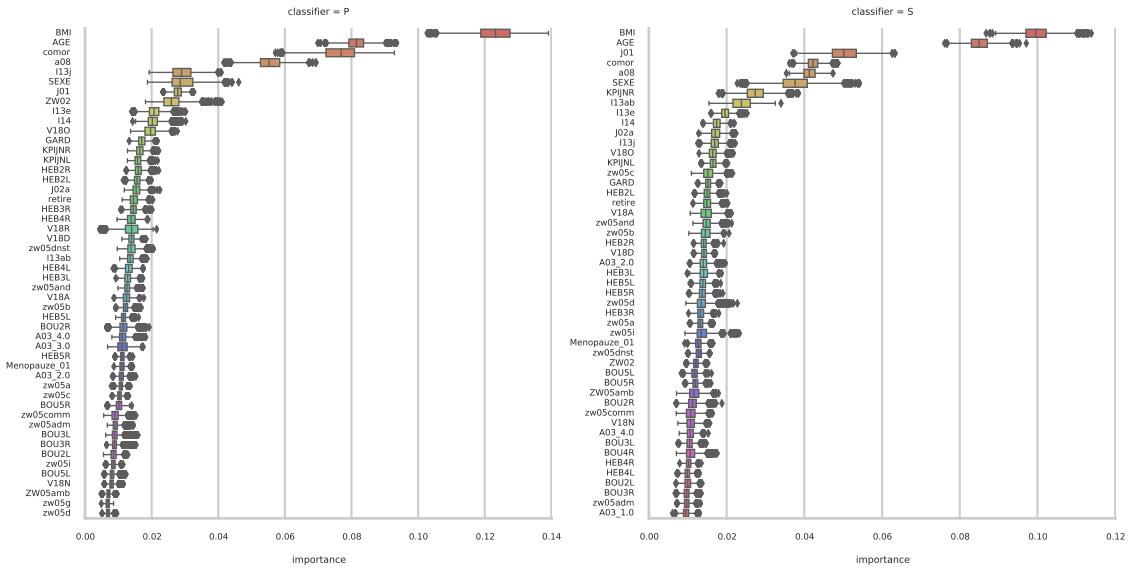

(b) 2 years shift

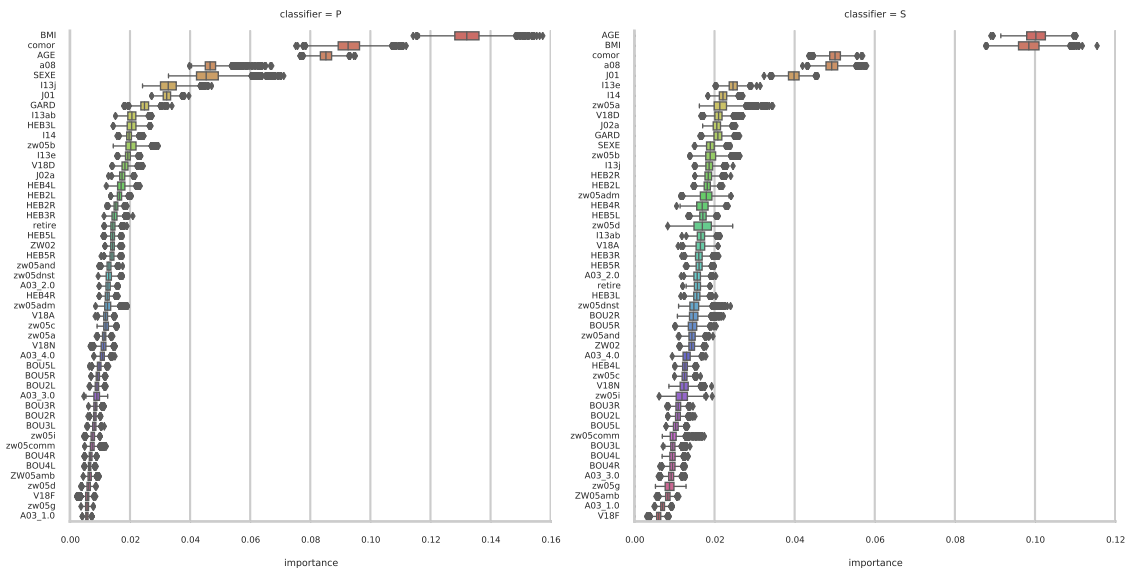

(c) 3 years shift

**eFigure 39:** Relative importance of top attributes used by the DIGICOD selection models. The two panels show the importance as impact on the probability of progression returned by different sub-models: pain-related (P) on the left, and structure-related (S) on the right. Attributes are listed in order of importance (descending).
